# Supplementary material for: ID2 Promotes Lineage Transition of Prostate Cancer through FGFR and JAK-STAT Signaling
Source: Preprints.org preprint supplement (doi:10.20944/preprints202311.1895.v1), 2023-11-29
Supplement: Supplementary file 1 [file supplementary]

(A)

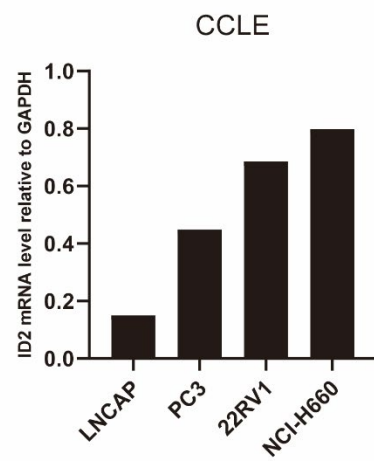

(B)

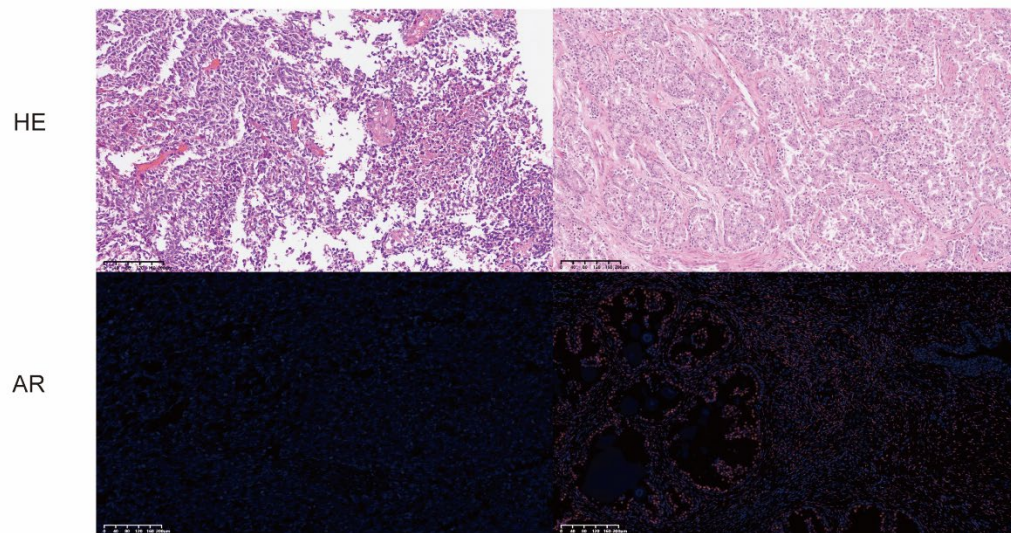

**Figure S1**

**A.** relative ID2 expression level in PCa cell lines from CCLE. **B.** HE staining and immunofluorescent of clinical PCa patients.

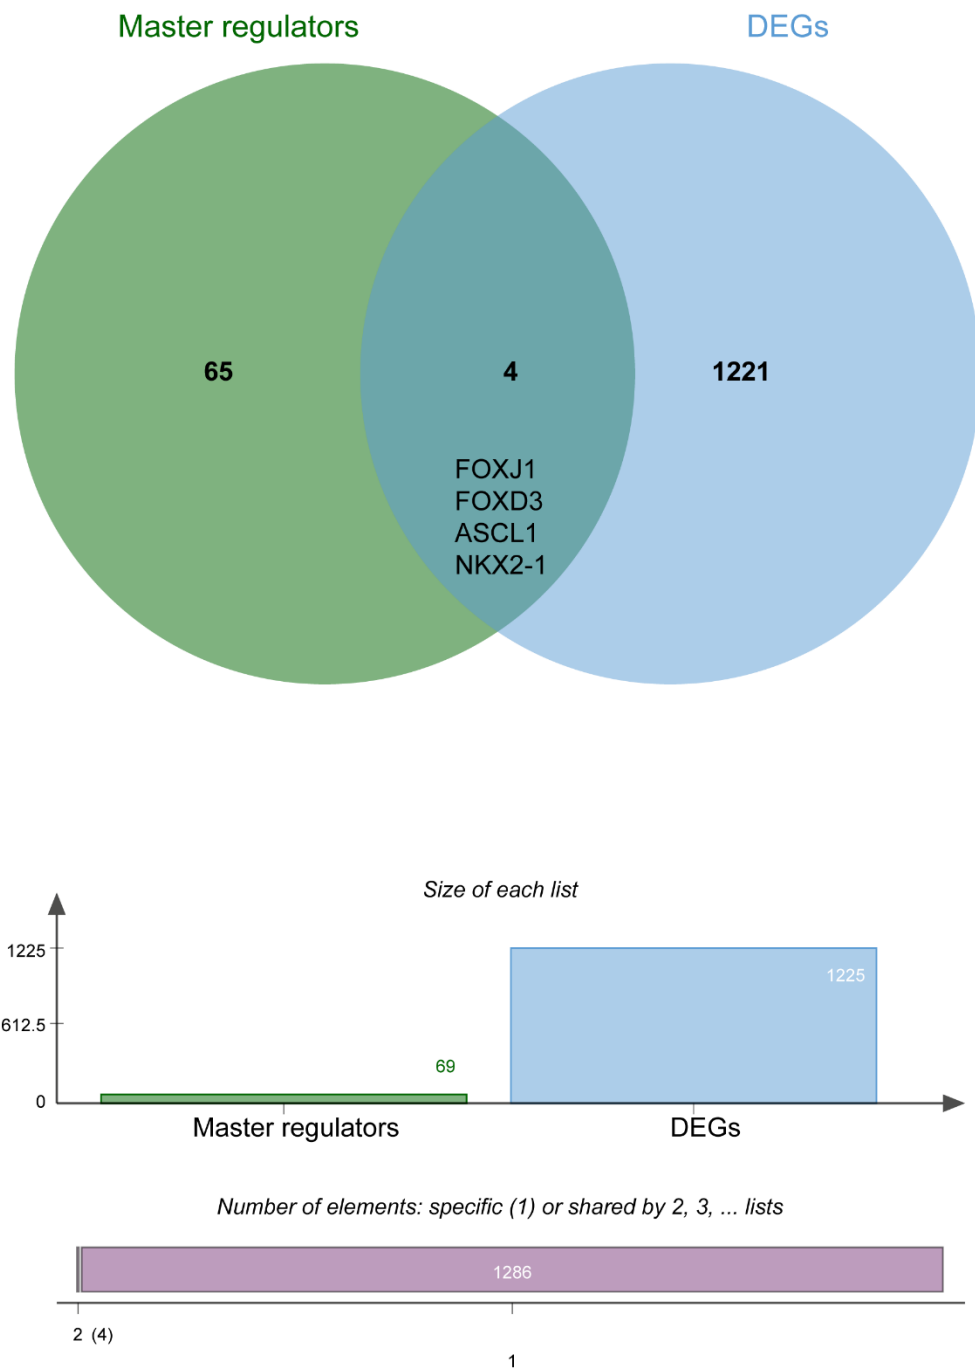

**Figure S2**

Intersection of Master regulators and DEGs. Master regulators was identified by viper R packages to infer effects of ID2 on protein activity changes. DEGs was identified using RNA-seq data of clinical NEPC and ADPC samples from SU2C 2019.

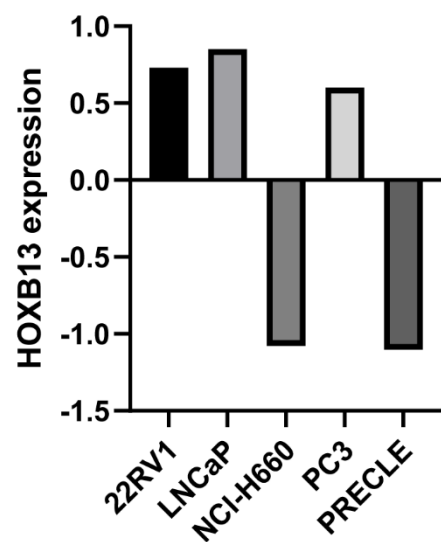

Figure S3

z-score normalized HOXB13 mRNA expression in PCa cell lines from CCLE.

(A)

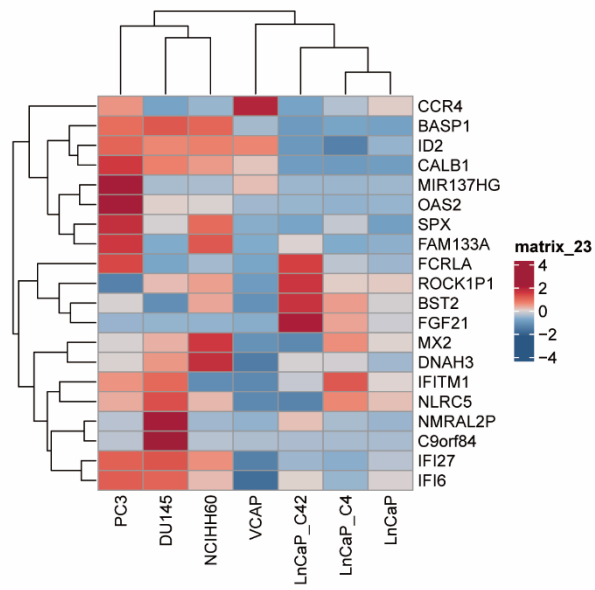

(B)

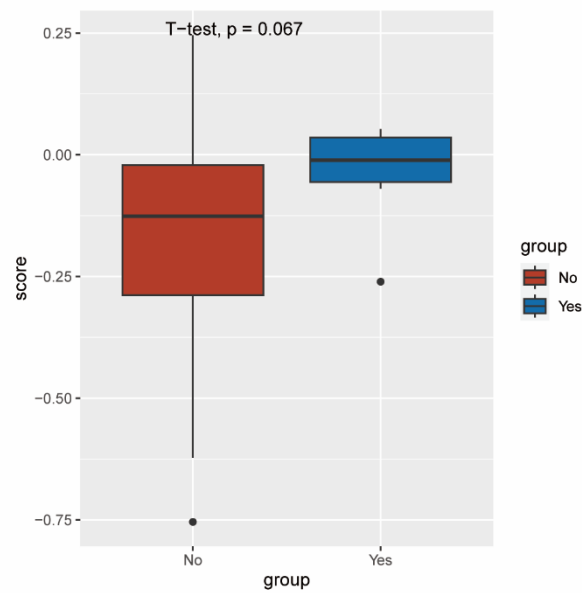

(C)

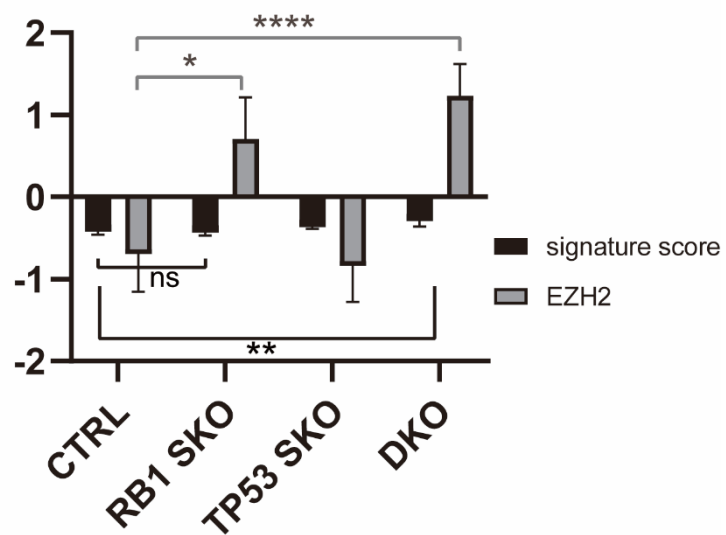

**Figure S4**

**A.** Expression of top 20 DEGs in PCa cell lines. **B.** ID2 UP50 signature score in clinical sample with NE features or not. **C.** ID2 UP50 signature analysis and EZH2 expression analysis after RB1 or TP53 gene knock out in LNCaP cell. SKO: single knock out. DKO: double knock out.
