# Supplementary material for: ID2 Promotes Lineage Transition of Prostate Cancer through FGFR and JAK-STAT Signaling
Source: Preprints.org preprint supplement (doi:10.20944/preprints202311.1895.v1), 2023-11-29
Supplement: Supplementary file 1 [file supplementary]

## Sheet: table1
result of differential analysis by edgeR
	logFC	logCPM	LR	PValue	FDR
IFI27	5.22751	4.23767	378.929	2.12931e-84	3.43756e-80
IFI6	3.16178	6.57329	242.863	9.34185e-55	7.54074e-51
ID2	3.10576	7.3997	230.714	4.1649e-52	2.24127e-48
BST2	3.54429	3.97735	212.584	3.75053e-48	1.51371e-44
IFITM1	3.28578	3.33701	160.416	9.17699e-37	2.96307e-33
OAS2	2.36012	4.45475	122.754	1.57842e-28	4.247e-25
U2AF1L5	-2.26845	3.94325	102.471	4.37659e-24	1.00937e-20
NTS	2.04761	4.21903	90.3031	2.04327e-21	4.12333e-18
KRT81	1.85434	4.77236	85.1973	2.70037e-20	4.84386e-17
NLRC5	3.05133	1.66485	78.8615	6.66199e-19	1.07551e-15
MX2	4.7015	0.495102	76.943	1.75965e-18	2.58253e-15
UBE2L6	2.33912	2.18351	63.9797	1.25709e-15	1.6912e-12
GBP1	2.04584	2.76674	62.1268	3.22036e-15	3.99919e-12
SAMD9L	1.93023	3.11146	61.9128	3.59005e-15	4.13984e-12
ATF3	1.64325	4.11552	58.6924	1.8435e-14	1.9841e-11
IFI44L	1.45016	5.29356	58.3504	2.19352e-14	2.21326e-11
FGF21	3.05535	0.904026	56.1719	6.64046e-14	6.30609e-11
SPX	2.61465	1.37408	55.8195	7.94406e-14	7.12494e-11
ADCY8	-1.35646	5.18643	50.8493	9.97353e-13	8.47435e-10
IGHE	5.44795	-0.501923	49.9906	1.54483e-12	1.24698e-09
TNXB	-1.34066	7.23178	49.4134	2.07328e-12	1.59386e-09
CPA4	1.96182	2.15776	46.9982	7.10528e-12	5.21398e-09
MIR137HG	2.50444	1.09341	46.0837	1.13308e-11	7.95325e-09
MMP1	-1.2816	6.89158	45.8297	1.28991e-11	8.67681e-09
FAM131B	-1.25832	7.02888	44.0201	3.25019e-11	2.09884e-08
ROCK1P1	2.71122	0.722281	43.3387	4.60385e-11	2.85864e-08
IFI16	1.39875	4.03898	42.6734	6.4687e-11	3.8678e-08
CXCL8	1.26122	4.97045	42.5919	6.74395e-11	3.88837e-08
FAM133A	2.34889	1.13489	42.1722	8.35782e-11	4.65271e-08
LGALS3BP	1.19776	6.15239	41.4032	1.23857e-10	6.65931e-08
CCR4	6.43963	-1.02636	41.3408	1.27873e-10	6.65931e-08
SCN8A	1.40673	3.7238	40.1327	2.37279e-10	1.19707e-07
IFIH1	1.55588	2.95826	40.0196	2.51427e-10	1.23001e-07
SEC31B	2.06157	1.51481	39.8476	2.74572e-10	1.30373e-07
CP	-1.23311	4.80324	39.6481	3.04096e-10	1.40266e-07
L1CAM	1.6219	2.67829	39.456	3.35543e-10	1.50473e-07
SAMD9	1.18156	5.24784	39.1706	3.88345e-10	1.69444e-07
DHRS2	1.3719	3.75469	38.5284	5.39621e-10	2.29254e-07
MAGEC2	1.70374	2.30893	38.4139	5.72242e-10	2.36879e-07
IRF9	2.05068	1.34822	37.0202	1.16911e-09	4.71854e-07
FAM135B	-1.38424	3.46559	36.8527	1.27403e-09	5.01656e-07
RSAD2	1.9052	1.58881	35.6778	2.32805e-09	8.94858e-07
UNC5C	-1.20774	4.44143	35.324	2.79172e-09	1.04813e-06
PDE1C	1.89132	1.58038	35.1119	3.1129e-09	1.14215e-06
KCNK10	-1.57263	2.32904	33.8499	5.95336e-09	2.1358e-06
B4GALNT3	-1.18163	4.43471	33.7939	6.12714e-09	2.15036e-06
MEGF8	-1.06811	6.09394	33.2426	8.13481e-09	2.79422e-06
PHACTR3	-1.53379	2.39977	33.144	8.55804e-09	2.87835e-06
CEACAM6	1.99332	1.19631	32.8717	9.84451e-09	3.24347e-06
SLFN5	1.08454	5.05151	32.2517	1.35437e-08	4.37298e-06
COL1A2	-1.05165	7.95545	30.5366	3.27635e-08	1.03712e-05
NXPH4	-1.04892	7.80191	30.3589	3.59057e-08	1.11473e-05
LHX1	1.34319	2.95664	30.2423	3.81293e-08	1.16143e-05
GPR135	1.26411	3.31309	29.7069	5.02545e-08	1.47693e-05
NMRAL2P	3.01978	-0.333717	29.7045	5.03166e-08	1.47693e-05
U2AF1	1.39923	2.61069	29.6081	5.28821e-08	1.52452e-05
SEMA6B	-1.11003	4.31965	29.1319	6.76129e-08	1.88796e-05
RIMKLA	-1.02793	5.05598	29.1258	6.78283e-08	1.88796e-05
BEST1	2.07365	0.78671	28.8068	7.9968e-08	2.18814e-05
HOXB13	-1.01477	9.10836	28.627	8.77503e-08	2.36107e-05
PTPRU	-0.986018	5.86853	28.5161	9.29245e-08	2.44664e-05
PARP9	0.987443	5.56802	28.4946	9.39615e-08	2.44664e-05
GABPB1-AS1	1.01947	4.99425	28.3346	1.02057e-07	2.61526e-05
KRT6A	1.95142	0.946495	28.2714	1.05443e-07	2.6598e-05
NKTR	0.983353	6.18201	28.1777	1.10672e-07	2.71755e-05
PWP2	2.29489	0.357572	28.1703	1.11099e-07	2.71755e-05
NOP53	-0.993295	6.63884	28.1183	1.14124e-07	2.74988e-05
NEAT1	1.00786	7.71462	28.0616	1.17515e-07	2.78995e-05
IL1B	1.19569	3.50619	27.9297	1.25802e-07	2.91961e-05
IRF7	1.17594	3.64186	27.9176	1.26594e-07	2.91961e-05
ABCA3	-1.00101	7.43999	27.7763	1.36182e-07	3.0965e-05
AL391425.1	2.08586	0.654865	27.6962	1.4194e-07	3.12082e-05
MT-TN	-1.00124	7.65437	27.6906	1.42355e-07	3.12082e-05
TFF3	-0.972116	6.09458	27.6696	1.43908e-07	3.12082e-05
INHBE	1.50518	2.02711	27.6552	1.44984e-07	3.12082e-05
PI3	1.03864	4.63076	27.4678	1.59728e-07	3.39296e-05
CYP1A1	1.52499	1.91056	26.9488	2.08914e-07	4.38015e-05
EIF3C	-0.956653	5.8648	26.8861	2.15805e-07	4.4666e-05
CMPK2	1.65061	1.47273	26.4147	2.7543e-07	5.62853e-05
TNFAIP3	1.57463	1.69135	26.3303	2.8774e-07	5.8066e-05
PLEKHH2	0.945182	5.62521	26.3027	2.9188e-07	5.81742e-05
NPW	-1.02253	4.55094	26.2325	3.02679e-07	5.95908e-05
MT-TC	-0.951345	6.57835	25.8882	3.61774e-07	7.03672e-05
AC015813.1	1.09764	3.85284	25.7245	3.93797e-07	7.5684e-05
B3GNT7	-1.42842	2.06341	25.6992	3.98998e-07	7.57815e-05
HES7	-1.1565	3.37698	25.5639	4.27982e-07	8.03411e-05
CA9	-0.957495	7.46273	25.4388	4.56641e-07	8.47357e-05
RPE65	0.959105	5.04599	25.3707	4.73058e-07	8.67846e-05
SPARC	-1.01991	4.42517	25.3282	4.83577e-07	8.77176e-05
TBC1D16	-0.953527	7.60341	25.1527	5.29643e-07	9.50062e-05
DNAH5	1.05138	4.14543	25.1254	5.37213e-07	9.53052e-05
PARP10	1.1661	3.27119	25.0391	5.6178e-07	9.85803e-05
ALS2CL	1.2517	2.72539	24.7306	6.59293e-07	0.000114448
RN7SL5P	2.60382	-0.282106	24.6152	6.99986e-07	0.000120219
FAM156B	2.2868	0.0963004	24.581	7.12502e-07	0.00012108
SMIM11A	-1.87674	0.740721	24.5085	7.39829e-07	0.000124415
PTPRF	-0.939125	8.06788	24.4687	7.55273e-07	0.000125702
AC021078.1	0.989535	4.50757	24.3188	8.16389e-07	0.000133647
SAMD1	-0.922924	6.69746	24.2982	8.25154e-07	0.000133647
LFNG	-0.923757	5.2592	24.2729	8.36068e-07	0.000133647
CACNG8	1.16778	3.11744	24.2544	8.44123e-07	0.000133647
RNF157	-0.907284	5.71435	24.2538	8.44402e-07	0.000133647
NAA15	0.907542	6.148	24.1029	9.13217e-07	0.000141975
HIST1H4H	1.19077	2.96519	24.0999	9.14642e-07	0.000141975
CCDC14	0.90572	6.0672	24.0816	9.23399e-07	0.000141975
CYP1B1	1.1374	3.28188	24.0225	9.52158e-07	0.000145015
ENTPD2	-0.996336	4.33864	23.7351	1.10547e-06	0.000166295
TLE2	-0.955212	4.71327	23.7229	1.11248e-06	0.000166295
DCP2	0.903392	5.3788	23.4944	1.25275e-06	0.000185545
CXCL1	0.889851	5.66773	23.3634	1.34103e-06	0.000196814
CFAP44	1.16412	2.99271	23.3251	1.36802e-06	0.000198967
NNMT	-1.10752	3.34098	23.2519	1.4211e-06	0.000204841
GTF2IP20	1.53116	1.47461	23.0645	1.56659e-06	0.000222272
DENND2A	-0.88522	5.91915	23.0608	1.56956e-06	0.000222272
VEPH1	1.09074	3.42858	22.9903	1.62824e-06	0.000228577
MMP28	1.35683	2.05018	22.9032	1.70364e-06	0.000235542
MAP2	1.23832	2.53653	22.8994	1.70704e-06	0.000235542
DHRS9	1.20636	2.69949	22.8749	1.72891e-06	0.000236538
TDRD7	1.28622	2.30666	22.8428	1.75811e-06	0.000238511
CFH	1.34569	2.06378	22.7905	1.80655e-06	0.000243041
WNT9A	1.13967	3.04378	22.6234	1.97074e-06	0.000262938
DDX58	1.01466	3.94061	22.5072	2.0936e-06	0.000277041
DNAH3	2.9961	-0.845742	22.4239	2.18634e-06	0.00028638
PCLO	1.21615	2.58169	22.4123	2.19965e-06	0.00028638
NAT8L	-0.87041	5.61841	22.3721	2.24618e-06	0.000290099
PALM	-0.967302	4.3281	22.334	2.29112e-06	0.000293554
TMTC3	0.915545	4.83322	22.286	2.34909e-06	0.000298611
FGF1	1.7671	0.805183	22.1515	2.51963e-06	0.000317507
CEP290	1.02429	3.79154	22.1382	2.53706e-06	0.000317507
ACSL5	1.63514	1.08003	21.9687	2.7713e-06	0.000344153
HLA-B	1.35407	1.9346	21.8792	2.9037e-06	0.000357842
AKAP9	0.918452	4.6656	21.7522	3.10234e-06	0.000379425
ALG5	0.984813	4.05391	21.7237	3.14872e-06	0.000382202
FAM111A	1.13487	2.89813	21.5801	3.39358e-06	0.000406762
CCNA1	1.29753	2.10032	21.5756	3.40145e-06	0.000406762
EGR1	1.04377	3.49697	21.5327	3.47842e-06	0.000412909
NABP1	0.888129	4.94782	21.4402	3.65028e-06	0.000430146
ARRB1	-0.861089	5.32971	21.2919	3.94388e-06	0.000461376
GBP3	0.847755	5.67301	21.2291	4.07537e-06	0.000473329
ZNF641	1.86968	0.487507	21.1974	4.14323e-06	0.000477773
BTBD8	1.688	0.873349	21.0973	4.36545e-06	0.000492584
NFIX	-0.869445	8.80564	21.092	4.37744e-06	0.000492584
TTC14	0.858226	5.29784	21.0894	4.38353e-06	0.000492584
ADGRG1	0.921647	4.50134	21.0811	4.40242e-06	0.000492584
STK32C	-0.854014	5.38752	21.0717	4.42423e-06	0.000492584
DDX60L	1.1141	2.92899	21.0183	4.54921e-06	0.000503031
MUC5AC	-0.868617	8.14348	20.9914	4.61347e-06	0.000506665
RTN4RL1	-1.54022	1.16714	20.8737	4.90579e-06	0.000535129
UNC5D	1.45214	1.46618	20.8519	4.96201e-06	0.000537629
REC8	1.33199	1.88228	20.7803	5.15104e-06	0.000554389
RHOBTB3	0.858342	7.17331	20.7251	5.30165e-06	0.00056682
AL450405.1	-0.842703	6.40237	20.5798	5.71962e-06	0.000607484
TIMP3	1.80356	0.561556	20.5594	5.78099e-06	0.000609988
ADGRA2	-1.02089	3.48012	20.5204	5.8998e-06	0.000615427
FTX	0.963333	3.98327	20.5153	5.91576e-06	0.000615427
FCRLA	2.3594	-0.34771	20.5052	5.94689e-06	0.000615427
GSKIP	0.857307	5.06228	20.4114	6.24556e-06	0.000642219
CCDC18-AS1	1.21593	2.27242	20.3109	6.58259e-06	0.000672591
ZNF681	1.79611	0.523887	20.2223	6.89437e-06	0.000700017
SH3PXD2B	-0.826437	5.67557	20.1912	7.00752e-06	0.000707059
MMP10	-1.30328	1.8833	20.1531	7.14858e-06	0.000716811
LTB4R	0.932201	4.1948	20.1239	7.25826e-06	0.000723317
GOLGA8B	0.889857	4.57367	20.0732	7.4534e-06	0.000738207
AHNAK2	-0.848475	8.23838	20.0487	7.54961e-06	0.000743176
TRIM31	1.86168	0.36171	20.0126	7.69334e-06	0.000752735
MALAT1	0.842578	7.20172	19.9633	7.89433e-06	0.000767747
PKDCC	-0.908285	4.35233	19.877	8.25871e-06	0.000798375
PODXL	0.821384	6.03603	19.8567	8.34701e-06	0.000800213
NKAIN1	-1.27213	1.96219	19.8499	8.37686e-06	0.000800213
RPS3AP38	2.84879	-0.957699	19.7224	8.95459e-06	0.000849113
SKIL	0.835417	5.16847	19.714	8.99394e-06	0.000849113
TFPI2	0.954789	3.87215	19.6857	9.12799e-06	0.000856758
NIPAL1	1.17605	2.35923	19.6096	9.49906e-06	0.000886432
AC138393.1	1.1313	2.58419	19.5653	9.72181e-06	0.000902005
REG4	1.22313	2.12485	19.4591	1.02777e-05	0.000942861
PCDH1	0.905127	4.3099	19.4589	1.0279e-05	0.000942861
INTS1	-0.835521	8.15884	19.4447	1.03555e-05	0.000944518
IL11	1.32061	1.75546	19.395	1.06287e-05	0.000963989
SBF1	-0.831402	7.34419	19.345	1.09106e-05	0.000984029
CEP83	0.950589	3.8199	19.2863	1.12511e-05	0.00100546
RPS2P5	-0.829131	9.58702	19.2826	1.12728e-05	0.00100546
SPTBN5	1.38268	1.49403	19.255	1.14372e-05	0.00101452
BASP1	2.60321	-0.768103	19.2428	1.15104e-05	0.00101543
CTXN1	-0.814625	6.49295	19.1656	1.19855e-05	0.0010516
SPOCD1	0.931148	3.97565	19.1475	1.20997e-05	0.00105587
OBSL1	-0.804942	6.28592	18.9076	1.37203e-05	0.00119086
IL15RA	1.69155	0.616157	18.8273	1.43108e-05	0.00123547
TRIP11	0.813389	5.15708	18.6827	1.54375e-05	0.00132565
NGEF	-0.81286	7.16586	18.621	1.59452e-05	0.00136201
PMS1	0.921022	3.92727	18.5556	1.65019e-05	0.00139584
RPLP0P6	-0.796443	6.24781	18.5542	1.65142e-05	0.00139584
RYR2	1.10957	2.52225	18.4816	1.71552e-05	0.00144244
AHSA2P	0.828416	4.87455	18.4717	1.72443e-05	0.00144244
C1QTNF6	1.61941	0.759512	18.454	1.74054e-05	0.00144842
MASP2	1.98216	-0.00159073	18.4088	1.78231e-05	0.00147557
AL353763.2	0.970356	3.42748	18.3552	1.83315e-05	0.00150992
AC090673.1	1.16545	2.21986	18.3265	1.86097e-05	0.00152505
HSPG2	-0.810217	7.88181	18.2783	1.90874e-05	0.00155629
CBX2	-0.802873	7.09939	18.2163	1.97188e-05	0.0015997
IL17RC	-0.781131	5.88934	18.0301	2.1744e-05	0.00174458
TGM2	1.28356	1.71571	18.0216	2.18416e-05	0.00174458
CATSPER2	1.39437	1.28271	18.0186	2.18757e-05	0.00174458
POSTN	-1.87588	0.0679027	18.0133	2.19369e-05	0.00174458
AC107959.3	1.64433	0.634746	17.9711	2.24286e-05	0.00177494
FAM156A	-1.73434	0.343036	17.9602	2.25568e-05	0.00177637
CXCL2	1.21105	1.95534	17.9468	2.27164e-05	0.00178026
RNPEPL1	-0.782126	6.21102	17.9304	2.29131e-05	0.001787
HERC2P2	0.787053	5.36692	17.9069	2.31981e-05	0.00179853
AC025419.1	2.89027	-1.14766	17.8999	2.32838e-05	0.00179853
AC022400.5	1.49874	0.977036	17.889	2.3417e-05	0.00180021
ATP13A2	-0.77809	6.06281	17.8502	2.38993e-05	0.00182858
SERPINB7	0.899244	3.96413	17.8356	2.40836e-05	0.00183399
PARP14	0.776815	5.91864	17.82	2.42811e-05	0.00184035
RPL3P4	-0.775443	6.06125	17.7367	2.53682e-05	0.00191376
AL390728.4	0.86203	4.2943	17.6775	2.61708e-05	0.00196512
KHK	-1.06383	2.61141	17.6038	2.72047e-05	0.00202417
PASD1	-1.68949	0.401509	17.6036	2.7208e-05	0.00202417
ZNF107	0.986876	3.13321	17.5944	2.73395e-05	0.00202463
AC015712.2	1.11688	2.33131	17.5735	2.76416e-05	0.00203085
AC092053.3	2.24952	-0.49995	17.5712	2.76751e-05	0.00203085
EID3	1.54356	0.820746	17.5078	2.86134e-05	0.0020902
CCDC9B	0.827899	4.59748	17.4857	2.8948e-05	0.00210512
COLEC10	-1.4925	0.905923	17.4597	2.93464e-05	0.00212452
SH3BP5-AS1	1.36385	1.30373	17.425	2.9887e-05	0.002154
RTN4RL2	-0.972725	3.19013	17.3972	3.03274e-05	0.0021746
HLA-C	0.829462	4.5602	17.388	3.04744e-05	0.0021746
UFL1	0.790459	5.05351	17.3764	3.06603e-05	0.0021746
SLC25A6	-0.788341	8.67289	17.3733	3.07116e-05	0.0021746
PLSCR4	1.05739	2.60667	17.2834	3.21985e-05	0.00226993
NOX5	1.52666	0.852332	17.2723	3.23875e-05	0.00227332
HIST2H2BF	1.54678	0.790247	17.2202	3.32886e-05	0.00232646
BIRC2	0.777817	5.21123	17.2113	3.3445e-05	0.00232731
BRCA2	0.902263	3.7624	17.1781	3.40336e-05	0.00235811
RSRP1	0.804384	4.78122	17.141	3.47053e-05	0.00239437
RPL13AP25	-1.12512	2.19616	17.1011	3.54424e-05	0.00243482
TRAPPC9	-0.763911	5.46704	17.0374	3.66506e-05	0.00250715
ATM	0.759202	6.04186	17.009	3.72023e-05	0.00253415
GOLGA8N	1.54506	0.760898	16.9837	3.77023e-05	0.00255742
AOX1	1.00296	2.89743	16.9752	3.78704e-05	0.00255808
PXDNL	2.56553	-0.955977	16.9532	3.83129e-05	0.00256794
CCDC18	0.868848	4.0354	16.9521	3.83346e-05	0.00256794
TM4SF5	2.56462	-0.954573	16.9398	3.85833e-05	0.00257392
AL049840.5	1.71621	0.30912	16.8939	3.95291e-05	0.00262616
BTBD2	-0.778278	7.6332	16.8621	4.01954e-05	0.00265289
AP000648.3	1.0386	2.63036	16.857	4.03035e-05	0.00265289
CALB1	2.67573	-1.07209	16.8469	4.05186e-05	0.00265289
ELFN2	-0.755769	6.09705	16.8437	4.05887e-05	0.00265289
SERPINI1	0.880132	3.88575	16.8282	4.09196e-05	0.00265571
RGS4	0.753504	5.63968	16.8263	4.09608e-05	0.00265571
RAB11FIP1P1	1.62255	0.512451	16.7977	4.15842e-05	0.00268338
SGK494	1.39848	1.11996	16.7915	4.17201e-05	0.00268338
SP110	0.93146	3.39648	16.7726	4.21381e-05	0.00269952
WDR97	1.04761	2.56384	16.7528	4.25794e-05	0.002717
C9orf84	2.38165	-0.789863	16.7276	4.31484e-05	0.00274247
SNAPC1	0.774392	5.05073	16.6776	4.43018e-05	0.00280474
RPL13AP5	-0.760174	6.63148	16.6122	4.58553e-05	0.00289175
ZNF761	0.889201	3.73476	16.6028	4.60831e-05	0.00289481
AKR1B10	1.04704	2.52771	16.5563	4.7228e-05	0.00295523
SDSL	0.97593	2.99638	16.4856	4.90198e-05	0.0030555
NEDD4	0.848603	4.11236	16.4428	5.01408e-05	0.00311336
STK32A	0.926261	3.35479	16.406	5.11242e-05	0.00316226
MAPK13	1.42049	1.00321	16.3676	5.21706e-05	0.00321466
IL6ST	0.746692	6.24481	16.3352	5.30686e-05	0.00325757
CCDC17	1.88746	-0.0680723	16.3053	5.39136e-05	0.0032969
KIAA1551	0.857199	3.96636	16.2686	5.49687e-05	0.00334874
HELZ2	0.749189	6.4979	16.2235	5.62907e-05	0.00341638
GRK6	-0.749429	6.56215	16.1946	5.71569e-05	0.00344594
SULT1C2	1.13622	2.01402	16.193	5.72046e-05	0.00344594
PODXL2	-0.748235	6.6211	16.1067	5.98718e-05	0.0035869
AC008038.1	-0.759268	7.47662	16.0962	6.02032e-05	0.0035869
FAM53B	-0.743409	6.36338	16.096	6.02112e-05	0.0035869
CEP126	0.935725	3.18602	16.0664	6.11612e-05	0.0036301
SLC6A8	-0.756088	9.17772	16.0404	6.20037e-05	0.00366662
PCDH15	1.68969	0.264452	16.0162	6.28032e-05	0.00370035
CDK5RAP3	0.920551	3.28736	15.9881	6.37427e-05	0.00374204
N4BP2L2-IT2	1.58753	0.49008	15.981	6.39805e-05	0.00374239
PGM5P2	0.831697	4.15524	15.9497	6.50492e-05	0.00377927
KCNG1	-0.908692	3.37324	15.9488	6.50792e-05	0.00377927
C10orf90	2.50182	-1.00273	15.9247	6.59144e-05	0.00381406
FGFR3	2.03862	-0.370832	15.9132	6.63158e-05	0.00382358
C1QL1	-0.731806	5.68784	15.8829	6.73857e-05	0.00387144
TGFBI	2.3314	-0.825977	15.8719	6.77767e-05	0.0038801
EGF	1.83964	-0.0423535	15.8335	6.91676e-05	0.00394573
NUCB2	0.759253	4.96425	15.7966	7.05285e-05	0.0040092
AC245060.6	1.36118	1.09522	15.7828	7.10467e-05	0.00402448
NELL2	-0.733892	5.47157	15.7648	7.1726e-05	0.00404876
TLN1	-0.751227	8.09466	15.757	7.20196e-05	0.00405116
MZT1	0.742856	5.22554	15.7413	7.26215e-05	0.00407084
TRHDE-AS1	0.903545	3.36763	15.7256	7.32259e-05	0.00409051
TAF1D	0.734013	6.35631	15.7072	7.39421e-05	0.00411628
TMEM255B	1.09844	2.10717	15.6723	7.53185e-05	0.00417849
RPL13A	-0.743141	11.2669	15.6215	7.73709e-05	0.00427765
AC097376.2	1.68802	0.214261	15.6124	7.77433e-05	0.00428358
CREB3L1	-0.739352	6.92561	15.5699	7.95121e-05	0.00436613
NT5DC2	-0.745737	8.62314	15.5619	7.98483e-05	0.00436973
NXN	-0.923389	3.14979	15.5453	8.05509e-05	0.00439329
AC048341.1	1.09614	2.05855	15.4321	8.55242e-05	0.00464523
ZNF195	0.735818	5.20841	15.4272	8.57457e-05	0.00464523
EIF5AL1	-0.741414	5.08593	15.4012	8.69316e-05	0.00468993
NTSR1	-0.73947	7.25687	15.3965	8.71518e-05	0.00468993
INSYN2B	1.12664	1.9245	15.3507	8.92899e-05	0.00478902
RPL18A	-0.737393	10.3018	15.3387	8.98557e-05	0.00479896
SH3RF3	-0.719253	5.79436	15.3314	9.0203e-05	0.00479896
ODF2L	0.803518	4.2746	15.328	9.0367e-05	0.00479896
SLC9A3-AS1	0.80566	4.24954	15.3072	9.13693e-05	0.00483628
ENO1	-0.733687	12.1691	15.266	9.33839e-05	0.00490179
SHH	1.42877	0.835229	15.255	9.39292e-05	0.00490179
C6orf141	0.766153	4.66748	15.2513	9.41118e-05	0.00490179
STAT1	0.733978	7.10801	15.2472	9.4316e-05	0.00490179
FAM171A2	-0.731818	5.20456	15.2453	9.44091e-05	0.00490179
SEMA4F	-0.835126	3.90311	15.245	9.44287e-05	0.00490179
TTYH1	1.94211	-0.298455	15.2296	9.51986e-05	0.00492592
ZNF525	0.94448	2.90971	15.1628	9.86272e-05	0.00508702
CXCR4	-0.971416	2.69635	15.1498	9.93108e-05	0.00510597
RPLP0	-0.731834	10.8939	15.139	9.988e-05	0.00511665
GAB2	-0.788003	4.38679	15.1338	0.000100153	0.00511665
ZNF720	0.922167	3.06009	15.1108	0.00010138	0.00515352
EIF5AP4	-0.782112	4.44138	15.1074	0.000101566	0.00515352
LRRC49	1.11913	1.90434	15.1024	0.000101832	0.00515352
MT-ND3	-0.731876	9.95475	15.0921	0.000102389	0.00516554
AGBL5	-0.712606	5.66597	15.0708	0.000103552	0.00520794
SLC52A3	1.82544	-0.101129	15.0617	0.000104052	0.0052168
AC010343.1	-0.906007	3.16809	15.0454	0.000104954	0.00523327
NRTN	-0.900709	3.20735	15.0441	0.000105028	0.00523327
AP000347.1	1.71127	0.0971207	15.0096	0.000106963	0.00531326
PYGB	-0.730505	9.32738	14.9952	0.000107783	0.00532199
CEP295	0.831001	3.87315	14.995	0.000107798	0.00532199
HIST2H2BE	0.869677	3.47004	14.9344	0.000111315	0.00547886
ZNF28	0.795366	4.24656	14.9215	0.00011208	0.00548459
SBSN	2.05665	-0.542947	14.921	0.000112111	0.00548459
ITPKB	-0.70891	5.77448	14.9014	0.000113278	0.00552496
MTSS1	1.42268	0.797208	14.8744	0.000114909	0.00558762
ANXA3	0.841956	3.70376	14.8086	0.000118991	0.00576874
SCD	-0.725497	9.44494	14.8008	0.000119485	0.00577537
POF1B	0.810402	4.0081	14.6905	0.000126686	0.00610513
FAM157B	2.08353	-0.613541	14.6806	0.000127347	0.00611874
DTX3L	0.70455	6.03769	14.6687	0.000128159	0.00613945
FAM131C	-0.839287	3.67352	14.6478	0.000129585	0.00618254
SCNN1G	0.965379	2.64754	14.6388	0.000130206	0.00618254
GOLGA4	0.706054	6.2202	14.6372	0.000130319	0.00618254
ABCC9	0.983643	2.51744	14.6332	0.00013059	0.00618254
CHD3	-0.722949	8.3447	14.618	0.000131649	0.00621446
TRHDE	0.71833	5.14893	14.6078	0.000132362	0.00622193
RPS21	-0.721035	9.19815	14.6048	0.000132578	0.00622193
KIF18A	0.809003	3.98998	14.599	0.000132983	0.00622285
FTCD	1.67824	0.0946799	14.5816	0.000134219	0.00626254
RPS29	-0.722854	7.6097	14.5701	0.000135039	0.00627816
EIF5A	-0.71836	10.1855	14.5586	0.00013587	0.00627816
ITGA1	1.31474	1.05723	14.5514	0.000136389	0.00627816
MYO5B	1.15868	1.649	14.5507	0.00013644	0.00627816
KCNQ3	1.68986	0.0778932	14.5404	0.000137187	0.00627816
SOX4	-0.710835	6.66218	14.5333	0.000137701	0.00627816
DGKH	0.709637	5.33057	14.5316	0.000137831	0.00627816
GPR158	0.915309	2.97637	14.5289	0.000138027	0.00627816
SP100	0.725451	4.9997	14.5285	0.000138054	0.00627816
SDC3	-0.711752	6.77412	14.5137	0.000139142	0.00630986
TMEM198B	0.90054	3.07953	14.4883	0.00014103	0.00637757
MYPN	1.37551	0.865758	14.4597	0.000143191	0.0064423
CACNA1H	-0.718823	8.36188	14.4539	0.000143636	0.0064423
PRR15	-0.759681	4.49629	14.4535	0.000143659	0.0064423
FOXK1	-0.709961	6.78968	14.4338	0.000145172	0.00649199
MAPT	-0.73981	4.7437	14.4275	0.00014566	0.00649199
BLZF1	0.744132	4.67878	14.4223	0.000146062	0.00649199
PRICKLE2	-1.92658	-0.486104	14.4183	0.000146375	0.00649199
ABCA10	1.26495	1.18779	14.3812	0.000149288	0.00660304
SHMT2	-0.715139	9.20747	14.3694	0.000150226	0.00661277
AZGP1	1.9523	-0.447758	14.3681	0.000150328	0.00661277
PRLR	1.98458	-0.518024	14.3293	0.000153455	0.0067311
HOXB9	2.16972	-0.807248	14.3245	0.000153851	0.0067311
SGO2	0.709628	5.17615	14.3034	0.000155587	0.00678865
SEMA3A	0.717725	5.01843	14.2698	0.000158386	0.00689214
RPL35	-0.710928	9.41209	14.2164	0.000162946	0.00703642
CASP1	2.29961	-0.980933	14.2148	0.000163084	0.00703642
MT-RNR1	-0.710298	9.69149	14.2085	0.000163626	0.00703642
CCDC82	0.779195	4.20825	14.2041	0.000164016	0.00703642
FANCM	0.753374	4.49737	14.2019	0.000164202	0.00703642
DIO2	2.10551	-0.729947	14.2006	0.000164317	0.00703642
AC133919.2	2.05605	-0.65782	14.1841	0.000165766	0.00707972
EIF2AK2	0.701368	6.63418	14.16	0.000167905	0.00715213
EVL	-0.691148	6.00817	14.1348	0.000170169	0.00722948
KIF26A	-0.718979	4.94243	14.1287	0.000170716	0.00723368
KIF21A	0.689539	5.69413	14.1188	0.000171618	0.00725289
DNER	0.930513	2.75987	14.1022	0.000173138	0.007298
LRP1	-0.704777	7.06817	14.091	0.000174179	0.00732276
ZNF441	1.84954	-0.287025	14.079	0.000175291	0.00735037
AC093788.1	2.21341	-0.888927	14.0577	0.000177284	0.00740144
ADAM11	-0.836811	3.5206	14.0526	0.000177767	0.00740144
AKR1C3	0.909655	2.89857	14.048	0.000178199	0.00740144
L3HYPDH	0.792744	3.99841	14.0465	0.000178342	0.00740144
LINC00106	1.58434	0.228635	14.0392	0.000179042	0.00741142
IL32	1.01555	2.21907	14.0293	0.000179988	0.00741288
FLNA	-0.703286	11.8551	14.0281	0.000180101	0.00741288
VPS51	-0.699161	6.7443	14.0244	0.000180455	0.00741288
ANO9	0.879793	3.12214	14.0145	0.000181405	0.00742411
IL1A	1.67959	0.0357628	14.0094	0.000181897	0.00742411
AL596202.1	1.24578	1.19153	14.0013	0.000182684	0.00742411
AC124944.2	1.66175	0.0647028	14.0011	0.000182699	0.00742411
MYSM1	0.686983	5.85216	13.9978	0.000183028	0.00742411
AL451123.1	2.00274	-0.59827	13.9865	0.000184132	0.00745017
GATA2-AS1	1.74675	-0.0998394	13.9719	0.000185563	0.00745994
C1QL4	-0.824262	3.62134	13.9701	0.000185743	0.00745994
PIBF1	0.88096	3.09964	13.9699	0.000185759	0.00745994
RNF207	0.738142	4.59887	13.9611	0.000186636	0.00746393
ATG16L2	0.998086	2.29172	13.9596	0.000186783	0.00746393
HSH2D	1.65013	0.0991347	13.93	0.000189745	0.00756358
RPS27	-0.70502	8.44002	13.9145	0.00019132	0.00760756
KIF5C	-0.68418	5.61157	13.9086	0.000191919	0.00761262
APLN	-0.691929	6.45617	13.9033	0.000192458	0.00761436
ZNF841	0.982179	2.37228	13.899	0.000192906	0.00761436
COL12A1	0.689615	6.34283	13.8844	0.000194409	0.00763733
MCRIP1	-0.727541	4.71299	13.8841	0.000194434	0.00763733
IL7R	0.684317	5.92564	13.8701	0.000195891	0.00767588
RPL13P12	-0.688913	6.35272	13.8546	0.000197508	0.00771251
HLA-V	1.38345	0.760687	13.852	0.000197781	0.00771251
FLNB-AS1	1.17298	1.44697	13.8289	0.000200235	0.00778048
MYO1D	-0.68381	6.07455	13.8264	0.000200501	0.00778048
PDK3	-0.725423	4.71913	13.822	0.00020097	0.00778048
CCDC73	1.99082	-0.601898	13.8157	0.000201639	0.00778771
KIF1C	-0.701613	8.82252	13.8079	0.000202479	0.00780149
GNAQ	0.830381	3.51612	13.7982	0.00020353	0.00782329
TMEM8B	-0.783784	4.00872	13.7607	0.00020764	0.00795596
EEF2	-0.696417	11.5739	13.7481	0.000209031	0.00795596
KLHL4	0.882022	3.03238	13.7469	0.000209167	0.00795596
CCL26	1.04401	2.01112	13.7454	0.000209333	0.00795596
WDR27	0.827961	3.51777	13.7402	0.000209916	0.00795596
CCDC186	0.838933	3.4116	13.74	0.000209938	0.00795596
IFITM3	0.69408	6.95294	13.7254	0.000211571	0.00799784
PNPLA6	-0.697946	7.28088	13.7199	0.000212194	0.00799784
SYTL2	0.768875	4.17239	13.7169	0.000212529	0.00799784
AL662795.2	0.911355	2.79541	13.6899	0.000215611	0.00809493
PFKFB4	-0.680735	5.55351	13.6854	0.000216131	0.00809558
RPL18AP3	-0.694559	7.09313	13.681	0.000216631	0.00809558
AC078795.1	1.73154	-0.116933	13.6564	0.000219498	0.00818376
UBTD1	-0.736439	4.50566	13.6109	0.000224877	0.00836324
USP53	0.751552	4.3304	13.607	0.000225348	0.00836324
DBNDD1	-0.717177	4.7421	13.5728	0.000229491	0.00849747
SPDEF	-0.741864	4.40388	13.4896	0.00023989	0.00886219
PRR16	-0.963431	2.36806	13.4736	0.00024194	0.00891752
CCL2	1.01592	2.09023	13.4553	0.000244312	0.00898444
ARL6	0.819512	3.51301	13.4467	0.000245433	0.00900516
GBA2	-0.678992	6.39654	13.4339	0.000247119	0.00904166
MX1	1.78741	-0.256698	13.4275	0.00024796	0.00904166
PEX6	-0.687405	5.17471	13.4264	0.000248108	0.00904166
AL049840.1	0.947142	2.47893	13.4004	0.000251566	0.00911657
MUC5B	-0.690854	8.93425	13.4001	0.000251617	0.00911657
METRN	-0.691814	8.29683	13.3963	0.000252115	0.00911657
AC093673.2	-1.80985	-0.400002	13.3941	0.000252422	0.00911657
HELLPAR	1.06823	1.82574	13.3892	0.000253073	0.00911968
CCNL1	0.680112	6.54738	13.3782	0.000254562	0.00915291
NAP1L3	1.14416	1.47139	13.3462	0.000258942	0.00928848
LUCAT1	1.21999	1.17003	13.3423	0.000259484	0.00928848
AC118344.2	1.41757	0.556045	13.322	0.000262313	0.009369
CEBPA	-0.755422	4.18264	13.2871	0.000267235	0.00950207
NDUFS6	-0.680225	6.74121	13.2867	0.000267298	0.00950207
SREK1	0.671627	5.51772	13.2831	0.000267805	0.00950207
AL136979.1	-1.92513	-0.663874	13.2559	0.000271717	0.00961975
LONP1	-0.686389	9.18351	13.2461	0.000273143	0.00964905
FUT9	1.00332	2.11166	13.2372	0.000274445	0.00965329
MIA2	0.686118	5.09618	13.2371	0.000274459	0.00965329
PPIAP53	2.31934	-1.12024	13.2162	0.00027754	0.00974045
EME2	0.782364	3.83399	13.212	0.000278156	0.00974088
KITLG	0.67134	5.4653	13.2028	0.000279526	0.00976767
ADGRF4	1.23242	1.10026	13.1908	0.000281327	0.00980938
TNFRSF25	0.81171	3.5046	13.172	0.000284167	0.00988704
ZNF700	1.01462	2.04037	13.1673	0.000284873	0.00989029
PTAR1	0.66831	5.51453	13.1433	0.000288553	0.00999657
AC009533.1	0.866117	2.99926	13.1374	0.000289458	0.0100064
ESRRG	2.22334	-1.02606	13.1115	0.000293494	0.0101243
RPL13	-0.680712	10.4814	13.1002	0.000295259	0.0101539
PYROXD1	0.77394	3.89044	13.098	0.000295612	0.0101539
HIST1H2BC	1.06927	1.77543	13.0858	0.000297547	0.0101874
AC015712.7	2.22115	-1.02839	13.0839	0.000297849	0.0101874
ZNF432	0.940528	2.43489	13.0791	0.000298616	0.0101921
HAPLN1	-0.758377	4.05883	13.0548	0.000302516	0.0103034
RPL10P16	-0.678033	7.12425	13.0304	0.00030648	0.0103954
LSAMP	-0.797302	3.60052	13.0302	0.000306506	0.0103954
RPL8	-0.677204	11.3563	12.9994	0.000311596	0.0105353
METRNL	-0.661916	5.59289	12.9973	0.000311934	0.0105353
EIF4A1	0.801834	3.54231	12.9822	0.000314474	0.0105989
UBL4A	-0.679667	7.41666	12.9563	0.00031885	0.010724
CBS	-0.826284	3.28723	12.9395	0.000321725	0.0107982
IGIP	1.05934	1.78528	12.9034	0.000327978	0.0109852
E2F7	0.660895	6.12788	12.8995	0.000328676	0.0109858
DNAJB14	0.721332	4.4463	12.8841	0.000331378	0.0110532
ZBED9	0.95704	2.29055	12.8788	0.000332321	0.0110548
RPL38	-0.678247	8.17394	12.8762	0.000332795	0.0110548
SAPCD2	-0.677734	7.45257	12.8665	0.000334516	0.0110892
N4BP2L2	0.671519	5.18211	12.8366	0.000339903	0.0112447
SLCO4A1	-0.676989	8.26469	12.8322	0.000340707	0.0112482
PRRC2B	-0.676893	8.17559	12.8235	0.000342293	0.0112775
RASSF8	0.659158	6.17446	12.8058	0.000345552	0.0113617
PFKL	-0.676073	7.97875	12.7835	0.000349687	0.0114622
KIAA0930	-0.660873	6.31638	12.7816	0.000350046	0.0114622
RCN3	-0.658231	5.53118	12.7779	0.00035074	0.0114622
ZDHHC21	0.736302	4.22753	12.7589	0.000354315	0.0115557
CWC22	0.691173	4.79371	12.7346	0.000358949	0.011672
KLRA1P	1.24468	0.980763	12.7327	0.000359327	0.011672
PNISR	0.655293	6.01101	12.7233	0.000361129	0.011707
CTDSP1	-0.661428	6.46376	12.7107	0.000363569	0.0117539
NME4	-0.66902	7.08197	12.7072	0.000364247	0.0117539
CLK1	0.689821	4.80099	12.7046	0.000364762	0.0117539
AL354740.1	1.95926	-0.705748	12.6999	0.000365678	0.01176
UACA	0.65303	5.62061	12.6843	0.000368736	0.0118347
ACAP2-IT1	2.05712	-0.869538	12.6597	0.000373615	0.0119524
ADAM15	-0.669459	10.0596	12.6547	0.000374623	0.0119524
DOP1A	0.826706	3.19934	12.6547	0.000374624	0.0119524
IFNE	1.29337	0.823183	12.6459	0.000376394	0.0119779
NEMF	0.66026	5.36057	12.6433	0.000376905	0.0119779
ZNF571	1.7877	-0.407151	12.6261	0.000380408	0.0120654
GCC2	0.704238	4.56435	12.616	0.00038245	0.0121064
TOGARAM1	0.972326	2.13674	12.577	0.000390524	0.0123378
C4BPAP1	1.87357	-0.580238	12.5688	0.000392233	0.0123524
RPS16	-0.668464	9.14906	12.5675	0.000392516	0.0123524
USP6	1.90916	-0.654488	12.5423	0.000397846	0.01248
FAM71F2	1.46056	0.294922	12.541	0.000398115	0.01248
PRR7	-0.650295	6.01015	12.5289	0.000400711	0.012537
TTLL7	0.802113	3.3917	12.5233	0.000401919	0.0125412
EREG	1.43814	0.348187	12.521	0.000402399	0.0125412
SCX	0.854427	2.92096	12.5074	0.000405351	0.0126088
AC009090.6	1.09955	1.49393	12.4853	0.00041016	0.0127307
RPS3	-0.664635	10.217	12.4822	0.000410847	0.0127307
FADS2	-0.667839	7.88359	12.4721	0.000413074	0.0127576
RPL10P9	-0.653852	5.41309	12.4711	0.000413294	0.0127576
GOLGB1	0.653907	6.43252	12.4419	0.000419808	0.012892
LRRCC1	0.726768	4.23079	12.4418	0.000419823	0.012892
CTDSP2	-0.663917	7.25155	12.4408	0.000420045	0.012892
ZNF469	-0.663402	7.2264	12.4317	0.000422115	0.0129126
NHLRC3	0.797843	3.40304	12.4308	0.000422314	0.0129126
HERC6	0.775205	3.64755	12.423	0.000424085	0.0129422
LINC01285	1.58487	-0.0127242	12.4008	0.000429141	0.0130718
NACC1	-0.664891	8.56829	12.3942	0.00043066	0.0130934
COL18A1	-0.664473	7.43844	12.3784	0.000434334	0.0131803
RNPC3	0.813439	3.23084	12.3687	0.000436602	0.0132099
SOX12	-0.664802	7.48971	12.3672	0.000436947	0.0132099
C4orf19	1.22555	0.996674	12.3509	0.000440784	0.0132812
SLC27A5	-0.731603	4.13552	12.3488	0.000441258	0.0132812
RPL36	-0.662362	9.18758	12.3436	0.000442499	0.0132812
MLST8	-0.66473	7.65839	12.3432	0.000442598	0.0132812
DDIT3	0.771295	3.6545	12.333	0.000445031	0.0132933
ERAP2	0.714911	4.335	12.3312	0.000445443	0.0132933
SPDL1	0.648244	6.27528	12.3311	0.000445469	0.0132933
DZIP3	0.791773	3.42935	12.3123	0.000449991	0.0134034
AC141557.2	1.61744	-0.0922045	12.3071	0.000451232	0.0134156
LRCH2	0.808819	3.25407	12.3002	0.00045292	0.0134411
COL7A1	0.822766	3.11075	12.2522	0.000464718	0.0137437
CBWD6	0.888484	2.57528	12.2518	0.00046482	0.0137437
RPS11	-0.658268	10.2028	12.2457	0.00046634	0.0137481
MOXD1	1.62925	-0.111469	12.2443	0.000466671	0.0137481
BCHE	0.858612	2.80959	12.2397	0.000467842	0.0137575
SNHG12	0.756881	3.77443	12.2279	0.000470806	0.0138194
KIF20B	0.664506	5.00126	12.2185	0.000473188	0.0138364
DDX39B	0.641161	5.80743	12.2151	0.000474045	0.0138364
PRPF39	0.669152	4.91568	12.2128	0.000474637	0.0138364
NAP1L2	0.77676	3.55382	12.2111	0.000475054	0.0138364
ZNF569	1.76094	-0.422742	12.2075	0.000475965	0.0138364
GNAZ	-0.738811	3.98874	12.2054	0.000476526	0.0138364
LAGE3	-0.641946	6.08567	12.2007	0.000477716	0.0138436
GDF11	-0.641955	6.08987	12.1977	0.000478489	0.0138436
GSDMB	0.972674	2.04606	12.1746	0.000484458	0.0139912
USP32P3	1.26393	0.834872	12.1709	0.000485397	0.0139933
COG6	0.711719	4.30986	12.1659	0.000486719	0.0140064
RPS2	-0.65458	11.617	12.1609	0.000488029	0.0140105
FAP	1.78228	-0.465048	12.1537	0.000489908	0.0140105
HLA-F	1.43094	0.304222	12.153	0.000490082	0.0140105
FZD8	-0.658384	8.50024	12.1507	0.000490688	0.0140105
CDKN1A	0.68639	4.62316	12.1488	0.000491199	0.0140105
HOXA10-AS	1.35299	0.538256	12.145	0.000492204	0.0140144
EEA1	0.654044	5.14353	12.1323	0.000495569	0.0140629
CELSR2	-0.800814	3.27384	12.1261	0.0004972	0.0140629
ZNF75A	0.778545	3.50187	12.1243	0.000497683	0.0140629
SLC22A23	-0.689604	4.5684	12.1225	0.00049817	0.0140629
ZNF675	0.826739	3.03305	12.1221	0.000498265	0.0140629
AC009948.1	0.853876	2.81071	12.1182	0.000499334	0.0140685
AC106037.1	2.1519	-1.07139	12.1109	0.000501277	0.0140986
AC100821.1	2.0783	-0.98074	12.0938	0.000505885	0.0141664
RYR3	1.04953	1.64171	12.0926	0.000506229	0.0141664
LAMC2	0.638893	5.96673	12.0922	0.00050632	0.0141664
MAFG-DT	-0.777702	3.49414	12.0837	0.000508644	0.0141868
ATP5ME	-0.773528	3.5276	12.0806	0.000509502	0.0141868
CILP2	1.68353	-0.261163	12.0797	0.000509744	0.0141868
TOX	1.11226	1.35222	12.0767	0.000510565	0.0141868
AC241952.1	1.09277	1.43801	12.0735	0.000511443	0.0141868
DSP	1.83704	-0.598313	12.0324	0.000522844	0.0144782
ESF1	0.654001	5.08062	12.0062	0.000530235	0.0146577
PDE2A	1.04492	1.65832	11.9819	0.000537184	0.0148244
SOX21-AS1	1.34617	0.515559	11.9617	0.000543061	0.0149611
AC015813.6	0.857332	2.7407	11.9573	0.000544335	0.0149706
MRNIP	0.728889	4.01808	11.9528	0.000545645	0.0149787
TMEM9B-AS1	1.67437	-0.253482	11.95	0.000546483	0.0149787
ABCA13	1.23821	0.882628	11.9456	0.000547775	0.0149886
POLI	0.81158	3.11343	11.9415	0.000548962	0.0149911
GALNT12	0.80135	3.21911	11.939	0.000549722	0.0149911
PITPNM3	0.713504	4.21948	11.9288	0.000552737	0.0150479
ZNF480	0.672448	4.7306	11.9255	0.000553694	0.0150486
WSCD1	-0.643713	5.27563	11.918	0.000555945	0.0150843
HOTAIRM1	1.05337	1.58735	11.9134	0.000557318	0.0150962
EDIL3	-0.642213	6.66695	11.8853	0.000565801	0.0152858
B4GALT2	-0.650887	7.43258	11.8839	0.000566213	0.0152858
MRPL12	-0.633922	5.53703	11.8711	0.000570119	0.0153656
ASIC1	-0.633707	5.53134	11.8507	0.000576396	0.0154954
MATR3	1.14731	1.16994	11.8492	0.000576855	0.0154954
AC069277.1	1.99597	-0.886404	11.8375	0.000580507	0.0155676
AL109615.3	1.99768	-0.911994	11.8004	0.000592171	0.0158515
LRRC69	1.44379	0.216256	11.7953	0.000593795	0.0158515
WDR54	-0.64353	5.18038	11.7946	0.00059404	0.0158515
ASS1	-0.642698	6.9721	11.7795	0.000598868	0.0158897
TBXAS1	-0.664491	4.79269	11.7776	0.00059947	0.0158897
ZNF775	-0.832532	2.87844	11.7767	0.000599783	0.0158897
RPS18	-0.646366	9.47447	11.7752	0.000600265	0.0158897
SNORA71C	1.52878	0.0152605	11.7725	0.000601109	0.0158897
TENM4	-0.630951	5.55402	11.771	0.000601592	0.0158897
FER1L6-AS2	-1.53553	-0.0536562	11.7683	0.000602476	0.0158897
GOLGA6L9	0.916595	2.26491	11.7656	0.000603344	0.0158897
SEMA3C	0.672079	4.66445	11.7602	0.000605105	0.0159101
MICU3	0.881815	2.49286	11.7572	0.00060609	0.0159101
USH2A	1.56477	-0.0656604	11.7485	0.000608907	0.0159565
ANKRD26	0.838738	2.82656	11.7457	0.000609834	0.0159565
RIMBP3	-1.73982	-0.540967	11.7345	0.00061351	0.0160208
SMIM3	-0.627825	5.68614	11.7322	0.000614278	0.0160208
HSF4	0.864219	2.60622	11.7131	0.000620632	0.0161604
RNASEH2C	-0.627237	5.67139	11.7095	0.000621804	0.0161649
PHF11	1.15099	1.12175	11.694	0.000627029	0.0162546
TRMT13	0.687155	4.43761	11.6929	0.000627406	0.0162546
CNTRL	0.749377	3.66996	11.6897	0.000628475	0.0162546
Z83843.1	0.997079	1.81771	11.6873	0.000629283	0.0162546
ZNF91	0.979297	1.91091	11.6813	0.000631309	0.0162809
KCNN3	1.15093	1.12562	11.673	0.000634132	0.0163247
TNRC18	-0.645556	8.09208	11.6704	0.000635028	0.0163247
DDX60	0.690673	4.38625	11.659	0.00063892	0.0163898
APBA2	-0.635307	6.60839	11.6526	0.000641115	0.0163898
CENPK	0.748077	3.66577	11.6518	0.000641401	0.0163898
ADCY3	-0.62876	6.19893	11.6485	0.000642547	0.0163898
ZNF83	0.667538	4.68395	11.6462	0.000643343	0.0163898
AC055811.4	0.773955	3.38841	11.6434	0.000644322	0.0163898
NDRG1	-0.642066	9.92775	11.6424	0.000644667	0.0163898
AC093157.1	0.880977	2.47065	11.6361	0.000646853	0.0164195
NXF3	1.52198	0.0077763	11.6325	0.00064809	0.0164251
ZNF701	0.778864	3.32789	11.6261	0.000650342	0.0164563
RPL39	-0.642841	8.792	11.6084	0.000656555	0.0165875
CENPE	0.656035	4.85258	11.5969	0.000660625	0.0166541
AC006480.2	1.84435	-0.69045	11.5951	0.000661252	0.0166541
ZNF117	1.11724	1.22412	11.5825	0.000665759	0.0167414
EFCAB13	1.31933	0.526181	11.5741	0.000668762	0.01678
CEP162	0.842699	2.73464	11.5715	0.000669692	0.01678
RPL29	-0.639999	9.91513	11.5677	0.000671058	0.01678
ADIRF-AS1	0.830969	2.83273	11.5667	0.000671449	0.01678
AC098613.1	1.10992	1.25591	11.5558	0.000675384	0.0168299
MAFB	-1.19359	0.922336	11.5521	0.00067672	0.0168299
BCL9L	-0.638979	7.20574	11.549	0.000677862	0.0168299
ARHGDIA	-0.642397	7.87987	11.5477	0.000678341	0.0168299
CERK	-0.623865	5.58387	11.5468	0.000678659	0.0168299
GEN1	0.660734	4.74152	11.5367	0.000682345	0.0168906
ZNF600	0.751367	3.58565	11.5344	0.0006832	0.0168906
FBL	-0.641949	7.76011	11.5252	0.000686583	0.0169483
SELPLG	1.41643	0.242237	11.5154	0.000690226	0.0169916
RELB	0.888016	2.40524	11.5148	0.000690441	0.0169916
IL15	1.38222	0.333427	11.5068	0.000693412	0.0170326
RND3	0.622449	5.89741	11.5047	0.000694216	0.0170326
FOXD4	1.29134	0.600443	11.4581	0.00071183	0.0174366
TBL1X	-0.62104	5.85425	11.4553	0.000712895	0.0174366
GCN1	-0.638967	8.5517	11.4526	0.000713925	0.0174366
ANO1	1.18179	0.977064	11.4456	0.000716643	0.0174766
EFNB1	-0.639525	7.73085	11.4369	0.000720017	0.0175324
SMCHD1	0.622932	6.20153	11.4334	0.00072134	0.0175381
KRT8P33	1.49655	0.0249486	11.4293	0.000722967	0.0175513
ZFYVE16	0.695863	4.22853	11.4175	0.000727556	0.0176149
AC112128.1	1.83034	-0.683778	11.4158	0.00072823	0.0176149
RPS5	-0.635127	10.2946	11.4104	0.00073034	0.0176149
FBXO6	-0.967898	1.89003	11.4088	0.00073098	0.0176149
C5orf15	0.619696	5.59806	11.4086	0.000731047	0.0176149
SLITRK6	0.812534	2.93942	11.3967	0.000735752	0.0177019
CYP26B1	1.44564	0.149802	11.3924	0.000737452	0.0177164
ADCY9	-0.622595	6.25751	11.3885	0.000739019	0.0177277
CCDC66	0.735947	3.70198	11.3771	0.000743565	0.0178103
AL031717.1	1.70564	-0.451363	11.3704	0.000746228	0.0178476
AC004556.1	-0.670374	4.51825	11.3377	0.000759477	0.0180997
G2E3	0.618121	5.95354	11.3369	0.00075984	0.0180997
TMEM45A	-0.617804	5.59197	11.3361	0.000760134	0.0180997
DNPH1	-0.617054	5.76156	11.325	0.000764723	0.0181822
NTHL1	-0.616636	5.64765	11.3214	0.000766182	0.0181901
RGP1	-0.616705	5.71572	11.3135	0.000769458	0.018241
HIST1H3E	1.18195	0.946654	11.2984	0.000775747	0.0183517
CHAC1	0.807653	2.95825	11.2968	0.000776402	0.0183517
TCN2	1.82371	-0.711057	11.2861	0.000780893	0.0184309
CENPJ	0.702886	4.08153	11.2742	0.000785912	0.0184636
NTNG1	0.83734	2.69608	11.2741	0.000785941	0.0184636
AC092757.2	2.01966	-1.02384	11.2722	0.000786778	0.0184636
AC009318.2	1.41797	0.187702	11.272	0.000786853	0.0184636
GPNMB	1.82222	-0.710211	11.2676	0.000788736	0.0184809
UQCRHL	-0.780531	3.17318	11.2564	0.000793501	0.0185656
FASN	-0.631553	9.61129	11.2524	0.000795183	0.018578
AC090004.1	1.95669	-0.931644	11.2491	0.000796605	0.0185844
AC068831.7	0.943571	1.99497	11.2452	0.000798288	0.0185968
SCNN1D	1.10519	1.21336	11.24	0.000800534	0.018612
TMEM56-RWDD3	1.95585	-0.933288	11.2383	0.000801249	0.018612
EGR2	1.35223	0.358425	11.2344	0.000802944	0.0186246
MOB3A	-0.617313	5.50805	11.2254	0.000806868	0.0186888
DPF3	1.72106	-0.512971	11.2117	0.000812822	0.0187997
ZNF614	0.702286	4.05392	11.1873	0.000823597	0.0189999
SLC2A1	-0.628018	7.1434	11.185	0.000824635	0.0189999
CADM2	0.853359	2.54905	11.1819	0.000825994	0.0189999
SLC16A14	0.763565	3.33138	11.1815	0.000826184	0.0189999
SPRY3	1.95064	-0.93371	11.1771	0.000828131	0.0190176
LSP1	2.01089	-1.02445	11.1717	0.000830542	0.0190458
SLCO1B3	0.808602	2.89069	11.1653	0.000833424	0.0190659
PRRX2	-0.708624	3.95336	11.1632	0.000834345	0.0190659
MSH5	1.04034	1.47712	11.1619	0.000834959	0.0190659
ADAMTS16	1.64607	-0.359779	11.1518	0.000839497	0.0191424
FBN1	0.732142	3.67161	11.1385	0.000845547	0.0192532
GMDS	-0.611281	5.62174	11.1323	0.000848381	0.0192802
STAT2	0.643446	4.84075	11.1307	0.00084912	0.0192802
EFNA3	-0.787961	3.05964	11.1239	0.000852236	0.0193237
OSCAR	1.2935	0.526697	11.1123	0.000857572	0.0194174
SSPO	0.771513	3.22252	11.1049	0.000861011	0.019468
POLD2	-0.629755	7.81394	11.0973	0.000864524	0.0194976
SYT17	-0.701576	4.02059	11.0969	0.000864737	0.0194976
SLFNL1	1.38296	0.252172	11.0865	0.000869595	0.0195798
AC010168.2	1.05584	1.38427	11.0838	0.000870829	0.0195803
ADGRB2	-0.618985	5.31852	11.0721	0.000876347	0.019633
TAS2R5	2.00214	-1.02776	11.0714	0.000876707	0.019633
GCLM	0.6108	5.96356	11.0692	0.000877722	0.019633
MARCH9	-0.641533	4.83593	11.0686	0.000878037	0.019633
PABPC1L	0.709489	3.90314	11.0635	0.000880444	0.0196596
TVP23C	1.07683	1.28926	11.0579	0.000883124	0.0196922
SNX16	0.81091	2.84125	11.0445	0.000889485	0.0198067
AL162458.1	0.960717	1.86083	11.0399	0.000891734	0.0198294
RN7SKP97	1.68055	-0.465971	10.999	0.000911632	0.020244
S1PR1	1.02045	1.53672	10.9865	0.000917792	0.0203508
EGLN3	-0.612026	5.45924	10.9841	0.000918965	0.0203508
HIST1H2AC	0.689249	4.14311	10.9737	0.000924165	0.020438
AC060780.1	0.837826	2.59462	10.965	0.000928508	0.0205059
KPNA5	0.789393	2.99348	10.9472	0.000937428	0.0206746
CCPG1	0.902346	2.15331	10.9355	0.000943393	0.0207778
CCDC85C	-0.6205	7.14832	10.9184	0.000952144	0.020942
SCAMP5	-0.761839	3.24212	10.9157	0.000953547	0.0209443
HMMR	0.605025	5.70723	10.8951	0.000964202	0.0211422
NBEAP3	-1.78747	-0.79161	10.8932	0.000965176	0.0211422
ASNS	0.987724	1.68784	10.8741	0.000975174	0.0213323
TMOD1	1.87671	-0.868997	10.8667	0.000979091	0.021389
AL132989.1	1.18611	0.846666	10.8626	0.000981266	0.0214075
ZC2HC1C	1.42903	0.094094	10.8447	0.000990798	0.021564
JRKL	0.724569	3.63037	10.8438	0.000991248	0.021564
TRIM6	1.02311	1.48841	10.8402	0.000993181	0.021564
ELF3	-0.607442	5.47487	10.8368	0.000995006	0.021564
GTF2IP23	1.87421	-0.867438	10.8366	0.000995118	0.021564
RPSA	-0.618348	10.5824	10.8305	0.0009984	0.0216061
AC002350.1	1.72453	-0.597045	10.826	0.00100083	0.021627
BIRC3	1.2101	0.769468	10.8238	0.00100204	0.021627
RETREG2	-0.612316	6.64364	10.8185	0.00100492	0.0216526
ZNF468	0.649812	4.58491	10.816	0.00100629	0.0216526
SEPT2	0.621151	8.15867	10.8142	0.00100725	0.0216526
ARID4A	0.681929	4.16935	10.8109	0.00100904	0.0216622
LENG8	0.620118	7.4206	10.8002	0.00101491	0.021736
CLCN4	0.742849	3.41047	10.7997	0.00101517	0.021736
NDUFA3	-0.601723	5.70212	10.782	0.00102495	0.0219162
AL138789.1	0.765154	3.16121	10.7743	0.00102918	0.0219775
EPOP	-0.601589	5.81282	10.7628	0.00103562	0.0220859
ALDOA	-0.685843	4.08916	10.7585	0.001038	0.0220916
AC073335.2	0.838744	2.52385	10.7574	0.00103862	0.0220916
RPS28P7	-0.620093	7.61288	10.7524	0.00104145	0.0220992
CHMP1B2P	0.859745	2.3737	10.7519	0.00104172	0.0220992
PRDM8	-0.672688	4.25486	10.7474	0.00104428	0.0221245
SHISAL1	-0.609916	5.3007	10.7406	0.00104813	0.0221768
MIR222HG	0.949571	1.83489	10.7245	0.00105725	0.0223406
AL109811.3	1.9158	-0.957339	10.712	0.00106444	0.0224462
AL590560.1	1.06145	1.2804	10.7086	0.00106639	0.0224462
PTPRS	-0.618626	7.7185	10.7058	0.001068	0.0224462
FLRT3	1.32168	0.35259	10.7054	0.00106824	0.0224462
LIFR	0.608906	6.63437	10.7031	0.00106957	0.0224462
AL391684.1	1.35034	0.269199	10.6981	0.00107243	0.0224462
SERTM1	1.9748	-1.04985	10.6976	0.00107276	0.0224462
TRIM66	0.717184	3.66595	10.6965	0.00107337	0.0224462
MCM2	-0.613081	7.0856	10.6847	0.00108023	0.0225604
ABCA2	-0.612986	7.08642	10.6798	0.00108309	0.0225647
CCZ1	-0.669246	4.26483	10.6796	0.00108323	0.0225647
CEP57L1	0.73475	3.43932	10.6626	0.00109321	0.0227241
RPL39P3	-0.614713	7.29935	10.6618	0.00109369	0.0227241
TNIP1	-0.60718	6.59952	10.654	0.00109835	0.0227914
RIMS3	-1.14869	0.908482	10.6499	0.00110077	0.0228125
SELENON	-0.613164	7.19627	10.6452	0.00110355	0.0228406
PAQR4	-0.60424	5.39379	10.6404	0.00110644	0.0228712
RNF187	-0.616332	7.88316	10.6365	0.00110876	0.0228898
HKDC1	1.4456	0.0219307	10.6327	0.00111103	0.0229074
GCAT	-0.616994	5.04046	10.6244	0.00111607	0.0229676
GPC6	0.608057	5.26035	10.6232	0.0011168	0.0229676
NAALAD2	1.53849	-0.194596	10.6165	0.0011208	0.0230206
RHBDL1	0.809704	2.70482	10.6088	0.00112553	0.0230216
HMOX1	0.614742	5.07766	10.6082	0.00112586	0.0230216
CBWD3	0.71322	3.6634	10.608	0.001126	0.0230216
ADGRL1	-0.615797	7.53586	10.6069	0.00112665	0.0230216
SIPA1	-0.597341	5.84554	10.6047	0.00112798	0.0230216
RPL37A	-0.613949	8.83308	10.5985	0.00113178	0.023044
PFN1P2	1.07463	1.20541	10.5983	0.00113193	0.023044
CFAP69	1.01169	1.47958	10.5957	0.00113349	0.0230467
NPIPB5	0.60052	5.46946	10.5868	0.00113901	0.0231075
MLLT11	0.846177	2.42036	10.5862	0.00113934	0.0231075
WDR4	-0.598642	6.16971	10.5835	0.001141	0.023112
RPS2P46	-0.614714	7.72225	10.5736	0.00114715	0.0232076
SYTL5	2.03351	-1.14756	10.5678	0.00115072	0.0232506
NSMF	-0.614599	7.65769	10.5653	0.00115228	0.0232511
RABL6	-0.614347	7.72352	10.5601	0.00115557	0.0232511
FABP4	-0.620834	4.93394	10.5597	0.00115583	0.0232511
STEAP2	0.720647	3.5626	10.5586	0.00115651	0.0232511
RND1	1.60289	-0.370067	10.5383	0.00116928	0.0234786
AMY2B	1.85299	-0.888314	10.5331	0.00117253	0.0235147
MDK	0.596331	5.55533	10.5249	0.0011778	0.0235777
PCDHA3	1.9591	-1.05174	10.5236	0.00117859	0.0235777
GLIPR1	0.676413	4.10094	10.5	0.00119378	0.0237725
GORAB	0.698802	3.80338	10.4999	0.00119382	0.0237725
CAMK1D	-0.611401	5.07653	10.4966	0.00119592	0.0237725
ST3GAL1	-0.610406	9.18051	10.496	0.00119632	0.0237725
TRAPPC6B	0.726402	3.46806	10.494	0.00119762	0.0237725
MT-ATP8	-0.694435	3.8552	10.4937	0.0011978	0.0237725
DLC1	0.635257	4.65538	10.4924	0.00119864	0.0237725
HEATR5A	0.640418	4.57835	10.485	0.00120347	0.0238027
SLC2A4	-1.19521	0.703777	10.4842	0.00120398	0.0238027
TRAF7	-0.610013	7.34452	10.4818	0.00120554	0.0238027
NARF	-0.594313	5.99692	10.481	0.00120606	0.0238027
CEACAM19	1.26071	0.497206	10.4783	0.00120787	0.0238093
PPM1J	-0.87272	2.19724	10.4583	0.00122098	0.0240123
MZT2B	-0.599625	5.36814	10.4581	0.00122114	0.0240123
SCHIP1	1.12339	0.981365	10.4527	0.00122471	0.0240532
AGR2	-0.601451	6.65024	10.4409	0.00123252	0.0241708
CLIP4	1.0038	1.49045	10.4392	0.00123369	0.0241708
MTM1	0.706432	3.67889	10.436	0.00123581	0.0241829
ZNF267	0.735911	3.33555	10.4292	0.00124038	0.024243
GOLGA8A	0.615012	4.96526	10.4256	0.0012428	0.0242609
RPL9	-0.607672	7.32109	10.4125	0.00125164	0.0244039
RPS3A	-0.609091	8.17433	10.4027	0.00125833	0.0244943
ZNF320	1.07208	1.17333	10.4012	0.00125931	0.0244943
USP33	0.591759	5.97428	10.3948	0.00126373	0.0245507
NEURL3	2.01667	-1.14556	10.3879	0.00126844	0.024602
DPP7	-0.600813	6.74116	10.3865	0.00126942	0.024602
NDUFB7	-0.604988	7.15646	10.382	0.00127251	0.0246191
RPS14	-0.60649	9.54733	10.3808	0.00127335	0.0246191
CDK6	0.594635	6.30302	10.3714	0.00127983	0.0247141
RPL3	-0.60501	10.5074	10.3692	0.00128133	0.0247141
KCNK9	0.621974	4.8179	10.3605	0.00128738	0.0248012
KLF11	-0.648008	4.41152	10.352	0.00129337	0.0248646
PLXNB2	-0.599791	6.74438	10.3493	0.00129527	0.0248646
KLK6	2.01263	-1.1479	10.3454	0.00129799	0.0248646
RPL41P1	-0.614117	4.93958	10.3451	0.0012982	0.0248646
MIS18BP1	0.5927	5.49475	10.3448	0.00129837	0.0248646
PLCXD2	0.714823	3.54127	10.3402	0.00130162	0.0248972
RBFOX3	1.33174	0.245141	10.3357	0.00130482	0.024929
NAXE	-0.600617	6.90368	10.3226	0.00131413	0.0250772
MEX3D	-0.590034	6.0797	10.3187	0.00131686	0.0250997
PTPRO	-1.0977	1.0226	10.306	0.00132598	0.0252377
AP001469.1	2.00867	-1.14696	10.304	0.0013274	0.0252377
CENPV	1.14099	0.889662	10.3021	0.00132879	0.0252377
AC141557.1	1.56602	-0.330241	10.2966	0.00133272	0.0252578
ENHO	-1.14669	0.847645	10.2963	0.00133298	0.0252578
SSTR5	-0.598363	6.78659	10.2861	0.00134034	0.025358
FAM157A	1.58623	-0.387452	10.2846	0.00134147	0.025358
AC089983.1	1.53129	-0.241123	10.2825	0.00134298	0.025358
ZFC3H1	0.59657	5.29069	10.266	0.00135505	0.025556
KTN1	0.604449	8.46065	10.2544	0.00136363	0.0256877
ZNF529	0.819814	2.51338	10.2504	0.00136656	0.0257129
MMP15	-0.656826	4.25429	10.2471	0.00136902	0.0257293
HECTD2	0.907047	1.95216	10.2419	0.00137283	0.025771
SMC5	0.590034	5.4767	10.2351	0.00137797	0.0258373
NUDT12	0.675148	3.99671	10.2263	0.00138449	0.0259295
DNAJB4	0.608679	4.97389	10.2196	0.00138958	0.0259947
SPTBN2	-0.599244	7.08892	10.2084	0.00139802	0.0260934
STYK1	1.0493	1.22481	10.2083	0.00139809	0.0260934
AMER1	-0.589356	5.4659	10.1981	0.00140583	0.0261931
RNF122	-0.816732	2.51423	10.197	0.00140668	0.0261931
IL18BP	0.791182	2.72897	10.1876	0.00141387	0.0262176
BMS1P4	0.912482	1.90479	10.1867	0.00141457	0.0262176
RBP4	-0.666686	4.08701	10.1864	0.00141479	0.0262176
CA13	1.07206	1.11091	10.1854	0.00141559	0.0262176
TAP1	0.775319	2.87846	10.1847	0.00141611	0.0262176
SLC25A23	-0.603271	7.60328	10.179	0.00142051	0.0262689
HTRA3	1.57439	-0.364575	10.1618	0.00143383	0.0264848
TFRC	0.599697	9.4963	10.1487	0.00144406	0.0266434
RACK1	-0.598686	10.2668	10.1465	0.00144573	0.0266436
C2orf68	-0.61325	4.84766	10.1412	0.00144993	0.0266906
PIK3C2A	0.584871	6.12079	10.1299	0.00145883	0.0268238
CPEB2	0.807047	2.57774	10.1267	0.00146133	0.0268393
TH	0.911317	1.9037	10.1213	0.00146569	0.0268887
TNNT1	-0.599371	7.38094	10.1093	0.00147525	0.0269847
VPS26B	-0.591443	6.61884	10.1074	0.00147674	0.0269847
PPP1R14BP3	-0.59598	5.15323	10.1073	0.0014768	0.0269847
SLC25A10	-0.595168	5.18204	10.1058	0.00147805	0.0269847
AC090673.2	1.67349	-0.638141	10.1042	0.00147928	0.0269847
AL353743.1	1.13566	0.871437	10.1009	0.00148196	0.0270031
STXBP3	0.628514	4.57118	10.0985	0.00148387	0.0270074
DNHD1	0.652408	4.24786	10.0922	0.00148902	0.0270706
CD226	1.61874	-0.514836	10.0901	0.00149069	0.0270706
APEH	-0.598246	7.34373	10.0846	0.00149515	0.027121
AC242376.2	0.994262	1.43437	10.0822	0.00149708	0.0271256
FIRRE	0.650183	4.26802	10.0744	0.00150343	0.0272048
RPS3AP26	-0.86047	2.16613	10.0721	0.00150533	0.0272048
L3MBTL1	0.751968	3.03945	10.0706	0.00150651	0.0272048
ZNF420	1.10127	0.973962	10.0472	0.00152577	0.0275219
TG	-0.585496	5.44174	10.0443	0.0015282	0.0275349
ZNF615	1.08183	1.05964	10.0414	0.00153061	0.0275476
CASP8AP2	0.65579	4.17822	10.035	0.00153594	0.027602
AL513485.1	1.69659	-0.689479	10.0321	0.00153833	0.027602
KRCC1	0.724975	3.29912	10.0316	0.00153876	0.027602
BAZ2B	0.688863	3.72418	10.0267	0.00154284	0.0276445
SLC1A4	-0.616495	4.72648	10.0235	0.00154558	0.0276629
RSPH4A	1.8643	-1.00011	10.0142	0.00155334	0.0277709
FKBP10	-0.596194	7.3756	10.0049	0.00156126	0.0278817
AC024293.1	-0.636467	4.41829	10.0002	0.00156522	0.0279215
PWWP2B	-0.591263	5.20174	9.99233	0.00157193	0.0279877
ZNF395	-0.579995	5.94759	9.99179	0.0015724	0.0279877
SYT16	0.731769	3.21337	9.9877	0.00157589	0.0280189
AC136604.2	1.76427	-0.824189	9.97979	0.00158268	0.0281087
RAC3	-0.584845	5.39365	9.97701	0.00158507	0.0281201
EXOC5P1	-1.53126	-0.39212	9.97203	0.00158936	0.0281654
IGFBP3	0.867512	2.11872	9.96648	0.00159416	0.0282149
BAHCC1	-0.579081	5.90993	9.96476	0.00159565	0.0282149
MYC	-0.593707	9.67493	9.95647	0.00160285	0.0283113
P3H3	-0.649708	4.22277	9.95227	0.00160651	0.0283449
DUSP2	-0.613782	4.72355	9.945	0.00161287	0.0284097
ZNF638	0.579492	6.12442	9.94404	0.00161371	0.0284097
SLC9A3	0.938463	1.71136	9.94041	0.00161689	0.0284347
PLCD3	-0.595744	7.75736	9.93647	0.00162036	0.0284647
AC021087.1	1.65928	-0.635923	9.93051	0.00162561	0.028509
LYSMD3	0.586869	5.28111	9.92961	0.00162641	0.028509
SH2B2	-0.625213	4.54034	9.91935	0.0016355	0.0286372
GTPBP1	-0.583573	6.47965	9.90489	0.0016484	0.0288319
AC090616.6	1.76075	-0.848792	9.88961	0.00166214	0.0290408
SCAP	-0.591102	7.24274	9.88186	0.00166916	0.0291117
AC124944.3	0.853336	2.16805	9.88114	0.00166981	0.0291117
KRT87P	1.75911	-0.847806	9.87122	0.00167884	0.0292376
C18orf54	0.615194	4.65937	9.8596	0.00168948	0.0293911
PLSCR1	0.576709	6.11319	9.85202	0.00169646	0.0294807
RNU6-1016P	1.84874	-1.00384	9.8432	0.00170461	0.0295837
IL13RA2	0.592682	7.51083	9.84068	0.00170694	0.0295837
PYCR1	-0.588793	7.15421	9.8371	0.00171027	0.0295837
AC092070.2	1.24507	0.41469	9.8325	0.00171455	0.0295837
MECP2	-0.588356	7.1254	9.83225	0.00171478	0.0295837
KIF14	0.574477	5.71287	9.8294	0.00171744	0.0295837
GCNA	1.11454	0.880482	9.82905	0.00171777	0.0295837
FAM78A	-0.815553	2.40578	9.82784	0.0017189	0.0295837
FAAP100	-0.581575	6.50347	9.82633	0.00172031	0.0295837
AC116049.1	1.20589	0.538252	9.82591	0.00172071	0.0295837
RPL27	-0.591562	8.31758	9.82124	0.00172508	0.0296273
TSPAN8	0.573709	5.61592	9.80849	0.00173708	0.0298017
ZNF765	0.653179	4.10247	9.79863	0.00174642	0.0298991
PLEKHM1P1	0.715295	3.31167	9.79858	0.00174646	0.0298991
LINC00161	1.71198	-0.767383	9.78885	0.00175573	0.030026
OVGP1	0.813544	2.41472	9.78497	0.00175944	0.0300576
CCDC124	-0.590414	7.46637	9.78209	0.0017622	0.0300728
WASHC4	0.581824	5.29454	9.7753	0.00176872	0.0301523
AC093525.9	1.35309	0.0887001	9.77159	0.0017723	0.0301587
CEP152	0.648158	4.16197	9.77064	0.00177321	0.0301587
APOL1	0.949336	1.60181	9.76909	0.0017747	0.0301587
CPLANE1	0.687721	3.62223	9.75577	0.00178761	0.0303461
SLC37A1	0.812795	2.41973	9.75069	0.00179256	0.0303482
TMEM160	-0.571875	5.64701	9.74942	0.00179379	0.0303482
TRIM5	0.682136	3.68853	9.74758	0.00179559	0.0303482
C7orf50	-0.584442	6.99919	9.74606	0.00179707	0.0303482
PMVK	-0.598065	4.9029	9.746	0.00179713	0.0303482
TIMM13	-0.577834	6.42664	9.7424	0.00180066	0.030376
KLHDC3	-0.578633	6.48222	9.73926	0.00180374	0.0303962
AC016722.2	1.74699	-0.84903	9.73261	0.00181027	0.0304214
SMC6	0.574651	5.49842	9.73202	0.00181086	0.0304214
HRASLS	-0.72236	3.19887	9.73198	0.00181089	0.0304214
TIMM50	-0.587864	7.37575	9.72948	0.00181336	0.0304313
MUC20-OT1	0.673755	3.77738	9.71797	0.00182475	0.0305847
RPL10	-0.585252	10.7918	9.71591	0.0018268	0.0305847
CENPB	-0.587471	8.9251	9.71452	0.00182818	0.0305847
RPL18	-0.586881	9.22931	9.71058	0.0018321	0.0305963
CNKSR1	1.14132	0.775767	9.70908	0.0018336	0.0305963
TBC1D9B	-0.58898	7.6448	9.70811	0.00183457	0.0305963
TBC1D8B	0.644249	4.18664	9.69917	0.00184351	0.0307137
C21orf91	0.693403	3.51687	9.69152	0.00185121	0.0307606
TBL1XR1	0.585537	7.26995	9.68984	0.0018529	0.0307606
ABCA8	0.837584	2.22585	9.68919	0.00185355	0.0307606
CLK4	0.727409	3.13175	9.68762	0.00185514	0.0307606
CEP112	0.953501	1.54635	9.68605	0.00185672	0.0307606
GSTCD	-0.607578	4.69061	9.68503	0.00185776	0.0307606
AC110079.1	0.874715	1.98703	9.67078	0.00187222	0.0309684
SMC4	0.587458	7.53457	9.66044	0.00188279	0.0311113
AQP7P1	1.63981	-0.654528	9.65682	0.0018865	0.0311364
ATAD5	0.741941	2.97989	9.6552	0.00188817	0.0311364
LCA5L	1.23604	0.401592	9.64765	0.00189594	0.0312328
KNL1	0.578666	5.26054	9.63155	0.00191264	0.0314756
RPS9	-0.583575	9.85677	9.6289	0.00191539	0.0314889
AC110597.1	1.14839	0.714697	9.62632	0.00191808	0.0315011
SGSM3	1.63589	-0.651798	9.6103	0.00193489	0.0316919
PGK1	-0.581273	11.7176	9.6092	0.00193605	0.0316919
PKD2	0.665628	3.83552	9.60722	0.00193814	0.0316919
PRR36	-0.883869	1.90167	9.60648	0.00193892	0.0316919
ZNF527	1.15622	0.68276	9.60591	0.00193952	0.0316919
HERC2P9	0.694533	3.46329	9.60256	0.00194306	0.0317176
ANKRD24	0.873534	1.98526	9.59914	0.00194669	0.0317448
EIF4A2	0.585152	7.92991	9.59693	0.00194903	0.0317509
TUT7	0.608455	4.62854	9.57933	0.00196781	0.0320244
RPAP3	0.569178	5.52771	9.57713	0.00197016	0.0320305
AC138207.4	1.63287	-0.652167	9.57248	0.00197516	0.0320794
MSLN	1.66078	-0.707581	9.56477	0.00198347	0.0321821
RPL37	-0.582862	8.85396	9.56046	0.00198813	0.0321973
DTNB	-0.668787	3.7685	9.56022	0.0019884	0.0321973
ZNF528	1.35024	0.0554113	9.54319	0.00200693	0.0324403
PITPNM1	-0.570254	6.30646	9.54274	0.00200742	0.0324403
EIF4BP7	-0.867214	1.97804	9.5349	0.00201601	0.0325464
STARD4-AS1	0.86325	2.0094	9.5316	0.00201964	0.0325697
FIBP	-0.576893	6.90012	9.52992	0.00202148	0.0325697
TTLL12	-0.577387	6.96232	9.52535	0.00202652	0.0326183
DAAM1	0.641854	4.1345	9.51909	0.00203345	0.0326973
AC012181.1	1.69206	-0.78692	9.51465	0.00203838	0.0327199
TMEM249	0.866895	1.98125	9.51382	0.0020393	0.0327199
PQLC1	-0.568091	6.22313	9.51235	0.00204094	0.0327199
KIAA1109	0.591361	4.89062	9.50867	0.00204503	0.0327529
RPS28	-0.580761	8.99573	9.49957	0.0020552	0.0328832
RPL7A	-0.579137	10.1366	9.49448	0.00206091	0.0329419
TRIM47	-0.584784	5.00254	9.48858	0.00206755	0.0330154
NSMCE1	-0.564411	5.75935	9.48505	0.00207153	0.0330462
AC083843.2	0.827222	2.21939	9.48105	0.00207605	0.0330857
CENPBD1P1	-0.567027	5.49896	9.47732	0.00208027	0.0331203
CCDC88A	0.572247	6.5983	9.47264	0.00208559	0.0331722
PDE4A	-0.564989	5.55895	9.46328	0.00209626	0.0333091
AC010976.1	1.17992	0.541179	9.46056	0.00209937	0.0333209
RPL4	-0.577704	10.4599	9.45902	0.00210113	0.0333209
PUS7L	0.563036	5.63	9.45265	0.00210844	0.033404
EEPD1	-0.562969	5.64009	9.44972	0.00211182	0.0334247
ZNF252P	0.590317	4.87555	9.4457	0.00211644	0.033449
UGGT2	0.639121	4.13473	9.44479	0.0021175	0.033449
SNX8	-0.573529	5.23925	9.44282	0.00211978	0.0334523
COX5B	-0.579154	7.39643	9.43928	0.00212387	0.0334581
RN7SKP16	1.81647	-1.02449	9.43714	0.00212635	0.0334581
TRANK1	0.676008	3.63205	9.43671	0.00212685	0.0334581
GLUL	-0.580567	7.6251	9.43396	0.00213004	0.0334581
WASF2	-0.580443	7.70678	9.43356	0.00213051	0.0334581
AC022211.1	1.12705	0.756636	9.43068	0.00213385	0.0334779
MAML3	-0.640949	4.09039	9.41797	0.00214869	0.0336469
PRAC2	-0.725493	3.03958	9.41628	0.00215068	0.0336469
GLI3	-0.564623	6.18428	9.41612	0.00215087	0.0336469
NAPA-AS1	-1.38463	-0.112571	9.40437	0.00216469	0.0338303
NOP9	-0.566725	6.35896	9.402	0.00216749	0.0338413
LINC00973	1.16213	0.603163	9.39655	0.00217395	0.0338788
TMEM106B	0.577882	5.08424	9.39643	0.00217408	0.0338788
TSPAN17	-0.565884	6.32573	9.39106	0.00218046	0.0339453
FARP1	-0.565226	6.30647	9.37633	0.00219805	0.0341023
BCR	-0.574191	7.09743	9.37604	0.0021984	0.0341023
HPS6	-0.56073	5.63955	9.37348	0.00220147	0.0341023
ITPR1	-0.563957	6.2273	9.3734	0.00220157	0.0341023
BX322639.1	0.905227	1.73638	9.37214	0.00220308	0.0341023
NCS1	-0.575979	7.29084	9.37035	0.00220523	0.0341023
CLUHP3	0.735179	2.93758	9.37027	0.00220533	0.0341023
AL139095.2	-0.722006	3.06068	9.36445	0.00221234	0.0341689
AP001029.2	1.29668	0.147326	9.36319	0.00221387	0.0341689
LRP5L	0.692807	3.38663	9.3571	0.00222123	0.0342278
MZT2A	-0.562935	6.19597	9.35653	0.00222192	0.0342278
MAZ	-0.573363	7.10466	9.34713	0.00223335	0.034371
NBL1	-0.574144	7.23827	9.32894	0.00225562	0.0346807
CCDC191	1.11778	0.766574	9.32664	0.00225846	0.0346913
ALDH1B1	-0.568754	6.72071	9.32076	0.00226571	0.0347697
FAT4	0.846299	2.06126	9.31412	0.00227394	0.0348628
CELSR1	-0.562256	6.24686	9.30664	0.00228324	0.0349722
NES	-0.573459	9.85603	9.29986	0.00229171	0.0350432
ALYREF	-0.575792	8.05826	9.29945	0.00229222	0.0350432
VGLL3	0.860377	1.96779	9.29733	0.00229487	0.0350506
DICER1	0.561221	6.21631	9.28856	0.00230589	0.0351855
SLC25A27	0.795115	2.3853	9.27597	0.00232179	0.0353948
DVL2	-0.558102	5.82984	9.26983	0.0023296	0.0354802
FBXO41	-0.564625	5.35124	9.25996	0.00234218	0.0356381
LMBRD2	0.622643	4.27377	9.25572	0.00234761	0.0356872
HMGA2	0.56736	6.78767	9.25375	0.00235014	0.035692
AC034236.1	-0.614272	4.38424	9.25084	0.00235387	0.0357151
NT5E	0.566867	5.26811	9.24695	0.00235889	0.0357391
ICE2	0.558567	6.11977	9.24455	0.00236197	0.0357391
ZNF672	-0.559624	6.19476	9.24446	0.00236209	0.0357391
BDP1	0.569277	5.16973	9.23988	0.002368	0.0357839
MPND	-0.684262	3.42601	9.23812	0.00237028	0.0357839
PPIC	0.661705	3.71816	9.23702	0.0023717	0.0357839
AL049869.3	1.51078	-0.436991	9.23123	0.00237921	0.0358637
FER	0.626019	4.21343	9.22686	0.0023849	0.0359159
MT-CO3	-0.568789	12.6544	9.22459	0.00238786	0.035927
TNXA	-0.756543	2.68373	9.2194	0.00239464	0.0359836
NBPF11	0.668308	3.61949	9.21755	0.00239706	0.0359836
GATA2	0.710661	3.13153	9.21659	0.00239831	0.0359836
TMEM205	-0.562999	5.35665	9.21235	0.00240389	0.0360337
PLXNC1	1.18565	0.476619	9.20597	0.00241228	0.0360464
AL161431.1	0.745373	2.7861	9.20591	0.00241235	0.0360464
ETV4	-0.567934	7.00686	9.20437	0.00241439	0.0360464
ACCS	0.847205	2.01841	9.20223	0.0024172	0.0360464
NT5M	-0.644912	3.92667	9.20192	0.00241761	0.0360464
RPL27A	-0.571094	9.26941	9.20036	0.00241967	0.0360464
C6orf163	1.6683	-0.807202	9.19984	0.00242036	0.0360464
BOK	-0.562463	6.51099	9.19256	0.00243001	0.0361568
ZNF680	0.782062	2.45791	9.18611	0.00243858	0.0362509
LINC00957	-1.1536	0.544723	9.18404	0.00244135	0.0362586
NFIC	-0.569519	7.23308	9.18162	0.00244458	0.0362732
LINC01352	1.70103	-0.866936	9.16998	0.00246017	0.0364711
AL359762.3	1.84918	-1.1195	9.16495	0.00246694	0.0365379
AC005674.2	1.46989	-0.3437	9.16039	0.0024731	0.0365955
TCEAL9	0.554406	5.76245	9.15806	0.00247624	0.0366085
FAU	-0.570854	8.45749	9.15364	0.00248224	0.0366476
SNTA1	-0.556187	6.14854	9.15276	0.00248343	0.0366476
LRP8	0.560009	6.43383	9.14785	0.00249011	0.0367126
UQCRC1	-0.570177	8.68537	9.14232	0.00249764	0.03679
SLC25A25	0.588804	4.72307	9.13852	0.00250283	0.0368209
SMARCA4	-0.569506	8.99268	9.13642	0.00250571	0.0368209
GAPDHP1	-0.574955	4.97971	9.13579	0.00250658	0.0368209
KRTCAP2	0.799771	2.30675	9.13387	0.0025092	0.036826
FAM76B	0.678123	3.44817	9.12929	0.0025155	0.0368848
DBN1	-0.570322	8.12647	9.12696	0.0025187	0.0368907
AL133517.1	1.50471	-0.45208	9.12536	0.0025209	0.0368907
FOXO4	-0.672522	3.51833	9.12402	0.00252275	0.0368907
LRFN1	-0.575562	4.95661	9.12105	0.00252685	0.0369087
SPON1	1.40527	-0.164375	9.11982	0.00252855	0.0369087
AC025569.1	1.59729	-0.667553	9.1159	0.00253397	0.0369503
HIST1H2BD	0.804103	2.27687	9.11445	0.00253599	0.0369503
MMRN1	0.658495	3.69589	9.10847	0.00254429	0.0370379
PHGDH	-0.569705	8.02814	9.1039	0.00255065	0.0370971
RCHY1	0.634744	4.0157	9.09315	0.00256568	0.0372821
LINC01239	1.22268	0.308798	9.08577	0.00257606	0.0373992
SREBF2	-0.564921	7.09602	9.07861	0.00258617	0.0375123
TLE1	-0.553013	6.08709	9.07366	0.00259318	0.0375801
KLHL28	0.649387	3.79898	9.07014	0.00259818	0.0376188
ABHD8	-0.552669	6.025	9.06833	0.00260075	0.0376223
EEF1A1P5	-0.566725	7.3162	9.06624	0.00260372	0.0376316
SCART1	0.797948	2.29502	9.05918	0.00261379	0.0377433
UBLCP1	0.617112	4.25109	9.0531	0.00262249	0.0378351
SPHK1	0.551154	5.61334	9.04975	0.0026273	0.0378707
CBX6	-0.565437	7.28176	9.03528	0.00264819	0.0381184
SERPINB1	0.583001	4.76663	9.03457	0.00264921	0.0381184
CRYZP1	1.62084	-0.747982	9.01998	0.00267044	0.0383897
FSIP2	0.797274	2.28609	9.01291	0.00268079	0.0384264
POLR2I	-0.637082	3.93614	9.01148	0.00268288	0.0384264
USP47	0.550335	5.87246	9.0111	0.00268346	0.0384264
RPL9P7	-0.78839	2.33806	9.00914	0.00268633	0.0384264
SGPP2	1.06796	0.868066	9.0087	0.00268697	0.0384264
TMF1	0.620686	4.18274	9.0085	0.00268728	0.0384264
USP45	0.616695	4.23554	9.00607	0.00269085	0.0384341
AL365203.2	0.72228	2.91613	9.00394	0.00269399	0.0384341
AL354822.1	0.859126	1.89733	9.00328	0.00269496	0.0384341
TP63	1.22015	0.310984	9.00056	0.00269897	0.0384574
AWAT2	-1.11659	0.641005	8.99638	0.00270514	0.0385113
ASPM	0.561697	5.16516	8.99124	0.00271277	0.0385858
MYH7B	1.25911	0.18415	8.98367	0.00272403	0.0386952
SYNGR1	-0.572005	4.93903	8.9815	0.00272727	0.0386952
SMG1P7	0.87314	1.80087	8.98124	0.00272765	0.0386952
UBE2Q2P2	1.05312	0.924033	8.97861	0.00273158	0.038717
RASA4DP	1.35675	-0.0684909	8.97383	0.00273874	0.0387845
LINC00886	0.82183	2.11181	8.96123	0.00275769	0.0389913
AARSD1	1.21958	0.297797	8.96091	0.00275818	0.0389913
ROCK1	0.554028	6.42722	8.95772	0.00276299	0.0389991
SLC16A3	-0.56372	9.08426	8.95735	0.00276356	0.0389991
PROX2	1.3589	-0.0853719	8.95266	0.00277067	0.0390652
UNC13B	-0.551904	5.46223	8.94673	0.00277967	0.0391579
ACO2	-0.559405	6.98101	8.93909	0.00279131	0.0392852
COL5A1	-0.561224	7.16898	8.93762	0.00279357	0.0392852
PLAGL1	0.710169	3.01257	8.93516	0.00279734	0.0393039
CKB	-0.5631	7.38074	8.93125	0.00280333	0.0393226
RPS15	-0.562774	9.15926	8.93111	0.00280354	0.0393226
DDB1	-0.562664	9.00184	8.92004	0.00282058	0.0395219
AC103591.4	1.58021	-0.669678	8.91871	0.00282264	0.0395219
SNRK-AS1	1.7207	-0.951941	8.90476	0.00284428	0.0397904
AC003681.1	1.14405	0.548228	8.9002	0.0028514	0.0398314
RPS8	-0.560853	9.87542	8.89898	0.0028533	0.0398314
C5orf34	0.68408	3.27788	8.89814	0.00285461	0.0398314
ARID3A	-0.709489	2.99693	8.89219	0.00286393	0.0399268
ZNF431	0.615653	4.19607	8.88945	0.00286823	0.0399523
SF3B3	-0.561637	8.97648	8.8866	0.00287272	0.0399676
ZNF358	-0.553461	5.33558	8.8856	0.00287428	0.0399676
TYW5	0.662032	3.53532	8.88311	0.0028782	0.0399877
UBR1	0.562785	5.06188	8.88102	0.00288151	0.0399992
KLF13	-0.55011	6.32229	8.87909	0.00288455	0.040007
SERF1B	0.963314	1.26929	8.87627	0.00288901	0.0400345
CCDC144CP	1.60794	-0.746223	8.87455	0.00289173	0.0400379
FLOT2	-0.546137	5.97089	8.86226	0.00291127	0.0402738
PRKACB	0.546001	5.96467	8.85998	0.00291491	0.0402896
LUC7L3	0.557485	7.05393	8.85788	0.00291827	0.0403015
PEAR1	0.733443	2.75968	8.84951	0.00293167	0.0404238
RIF1	0.552804	6.58307	8.84923	0.00293213	0.0404238
C2orf66	1.41662	-0.275672	8.84637	0.00293673	0.0404527
VEGFB	-0.544624	5.68911	8.84296	0.00294222	0.0404937
OAS3	0.554322	6.79352	8.82995	0.00296327	0.040663
C2orf88	1.38244	-0.161172	8.82951	0.00296398	0.040663
PWAR6	0.820016	2.07595	8.8293	0.00296433	0.040663
HSPA12B	0.957584	1.28664	8.82913	0.00296459	0.040663
AC135279.1	1.38835	-0.195423	8.82595	0.00296977	0.0406995
TPI1	-0.558099	10.2207	8.8241	0.00297278	0.0407062
ZBTB42	-0.648161	3.69063	8.82003	0.00297942	0.0407624
RNA5SP187	1.63787	-0.827908	8.81628	0.00298555	0.0408117
MTCO1P49	1.63733	-0.827192	8.81066	0.00299476	0.0409031
ITSN2	0.569385	4.876	8.79922	0.0030136	0.0411255
OSR1	-0.946182	1.31447	8.79407	0.0030221	0.0412068
DDN-AS1	1.75999	-1.04809	8.79064	0.0030278	0.0412497
MAP9	0.634051	3.86538	8.786	0.00303552	0.0413199
BMP3	-0.966269	1.21216	8.78349	0.00303968	0.0413418
IL22RA1	0.978051	1.18729	8.78153	0.00304297	0.0413516
LINC01085	1.63387	-0.825573	8.77371	0.00305603	0.0414942
ANXA1	0.558395	8.65847	8.76979	0.00306261	0.0415151
AKAP11	0.550525	5.31217	8.76973	0.00306272	0.0415151
AP4E1	0.593793	4.44725	8.76746	0.00306652	0.0415318
AC027796.4	1.17721	0.387236	8.76406	0.00307225	0.0415745
PLEKHA5	0.568775	4.86391	8.76114	0.00307717	0.0415867
PNN	0.558963	7.51901	8.75836	0.00308186	0.0415867
BTBD19	0.790847	2.25092	8.75792	0.0030826	0.0415867
TBC1D32	0.799817	2.18798	8.75742	0.00308345	0.0415867
MRPL23	-0.601604	4.31676	8.73849	0.00311563	0.0419856
NCK2	-0.659843	3.48805	8.73442	0.00312259	0.0420443
TBC1D10C	1.45195	-0.379293	8.73236	0.00312611	0.0420566
NEXN-AS1	1.51798	-0.580525	8.72727	0.00313485	0.042069
CARD6	0.821177	2.04113	8.72693	0.00313544	0.042069
CREBRF	0.783484	2.29453	8.72639	0.00313638	0.042069
KCNQ1OT1	0.706593	2.96533	8.72576	0.00313746	0.042069
IFT80	0.65683	3.52425	8.72011	0.00314719	0.0421646
AC069499.1	0.971713	1.18861	8.71782	0.00315115	0.0421826
RPL32	-0.555269	9.57731	8.71282	0.00315979	0.0422632
ZNF33B	0.66497	3.41481	8.70846	0.00316737	0.0423295
PRICKLE1	-0.686838	3.15202	8.70332	0.00317631	0.0424139
BRIP1	0.586952	4.51337	8.70157	0.00317936	0.0424195
RPL37P6	-1.73637	-1.10399	8.69836	0.00318497	0.0424524
SCFD1	0.540374	5.81644	8.69703	0.00318729	0.0424524
ZNF483	1.56391	-0.688733	8.69564	0.00318971	0.0424524
ANKRD10-IT1	0.758559	2.46761	8.6892	0.00320101	0.0425562
GRAMD1B	0.727837	2.75635	8.68819	0.00320279	0.0425562
DMTF1	0.547183	5.32874	8.68578	0.00320703	0.0425775
ZNF365	0.632147	3.8423	8.68148	0.0032146	0.0426113
AL359922.2	0.99304	1.08452	8.68133	0.00321485	0.0426113
ZNF789	0.679042	3.23086	8.66709	0.00324007	0.0429104
MGLL	-0.553489	7.26624	8.66465	0.00324443	0.0429212
AC016739.1	-0.657848	3.47495	8.66365	0.00324621	0.0429212
IGKV1OR9-2	-1.61936	-0.901584	8.65989	0.00325291	0.0429507
IGFBP4	-0.554021	9.21589	8.65941	0.00325376	0.0429507
RALYL	1.59205	-0.768481	8.65659	0.00325881	0.0429579
AL450124.1	-1.47627	-0.559768	8.65595	0.00325995	0.0429579
DST	0.54529	6.48181	8.65464	0.00326229	0.0429579
RPL22P1	-0.627167	3.88296	8.6458	0.00327815	0.0431316
SPAG1	0.650238	3.56772	8.63868	0.003291	0.0432351
MPP7	0.731254	2.69502	8.63847	0.00329138	0.0432351
USPL1	0.632916	3.8062	8.6351	0.00329748	0.0432801
IGF2BP2-AS1	1.50988	-0.584925	8.63303	0.00330121	0.0432927
ADCK2	-0.565214	4.84937	8.62857	0.00330932	0.0432927
SUCO	0.542003	6.30588	8.62816	0.00331006	0.0432927
AP5B1	-0.538644	5.94097	8.62772	0.00331086	0.0432927
OGT	0.553999	8.54426	8.62717	0.00331185	0.0432927
LARP4	0.549797	7.03472	8.6208	0.00332345	0.0434092
AC044787.1	-0.752712	2.4826	8.61166	0.00334017	0.0435656
CDK16	-0.553346	7.42773	8.61068	0.00334198	0.0435656
COL6A3	1.30608	-0.0231332	8.60893	0.00334518	0.0435656
AVPR1B	1.23953	0.146564	8.60837	0.00334622	0.0435656
STARD4	0.590339	4.4102	8.59894	0.00336358	0.0437563
WDR19	0.662107	3.39631	8.59693	0.0033673	0.0437694
PPP2R5D	-0.546261	5.26405	8.59228	0.0033759	0.043846
SH3PXD2A	-0.558456	4.95882	8.5905	0.00337922	0.0438537
NELFB	-0.551221	7.28702	8.58863	0.00338268	0.0438635
SPATA2L	-0.60735	4.16077	8.58711	0.00338551	0.0438649
PDGFRB	1.52878	-0.630489	8.58501	0.00338941	0.0438787
RPL28	-0.550771	9.86911	8.58361	0.00339201	0.0438787
RB1	0.536191	5.64621	8.57745	0.00340351	0.0439922
ZNF605	0.816204	2.02391	8.57199	0.00341374	0.0440892
FAM227A	0.736309	2.61341	8.56351	0.00342967	0.0442334
MRPS31P5	1.44265	-0.418874	8.56313	0.00343039	0.0442334
ANKRD10	0.555765	4.98773	8.55695	0.00344205	0.0443483
SPINK5	0.777584	2.27977	8.54803	0.00345897	0.0445307
BRCA1	0.579455	4.54906	8.54658	0.00346172	0.0445307
FRMD3	0.780355	2.26242	8.54403	0.00346657	0.0445576
LINC01315	-1.04547	0.824023	8.54046	0.00347338	0.0445995
RPL4P4	-0.691843	3.02908	8.5381	0.00347788	0.0445995
POLQ	0.547796	5.14612	8.53797	0.00347812	0.0445995
HES4	-0.54668	5.16268	8.52242	0.00350798	0.0449467
PTPA	-0.551029	7.99498	8.51883	0.0035149	0.0449996
ZC3H8	0.60109	4.21217	8.51684	0.00351874	0.0450131
AC093827.3	-1.63892	-0.963214	8.51178	0.00352854	0.0450965
SSBP4	-0.547541	7.17354	8.50963	0.00353273	0.0450965
AC138932.3	1.73772	-1.07121	8.50796	0.00353596	0.0450965
MN1	0.639942	3.6544	8.50653	0.00353875	0.0450965
VPS18	-0.535137	6.0084	8.50628	0.00353923	0.0450965
RITA1	-0.534724	5.96602	8.50001	0.00355144	0.0452017
PRELID1	-0.55038	7.9803	8.49917	0.00355309	0.0452017
RPL41P5	-0.586344	4.41241	8.49325	0.00356466	0.0453133
AURKAIP1	-0.550234	7.78304	8.48719	0.00357656	0.0454288
AC245884.3	1.78664	-1.14496	8.47994	0.00359084	0.0455291
UBE2CP2	1.73473	-1.07083	8.47833	0.00359402	0.0455291
FRG1HP	0.622022	3.87708	8.47789	0.00359489	0.0455291
PRDX2	-0.549239	8.4086	8.47666	0.00359733	0.0455291
HRASLS2	1.54779	-0.705892	8.47603	0.00359856	0.0455291
BLVRA	-0.535425	5.51413	8.47085	0.00360883	0.0456233
CNNM3	-0.54445	5.18638	8.46856	0.00361336	0.045632
SCOC	0.54135	5.2925	8.46766	0.00361517	0.045632
AC091181.1	1.78351	-1.14574	8.4499	0.00365064	0.0460437
CPED1	1.06961	0.740011	8.44699	0.00365647	0.0460614
BCAM	-0.533769	6.12255	8.44636	0.00365775	0.0460614
YBX1P1	-0.573169	4.58855	8.44398	0.00366254	0.0460723
SERPINA1	0.73728	2.57005	8.4431	0.00366432	0.0460723
ZNF678	0.641416	3.58765	8.44074	0.00366907	0.0460961
AC004990.1	1.35916	-0.207121	8.43432	0.00368205	0.0461838
CARM1	-0.548157	7.48273	8.43426	0.00368217	0.0461838
SPRED2	-0.536684	6.37521	8.43304	0.00368463	0.0461838
CLEC2D	0.999209	0.993373	8.43097	0.00368883	0.0462005
CNIH2	-0.882197	1.56303	8.42524	0.00370048	0.0463106
SSPN	1.45116	-0.479044	8.42205	0.00370698	0.0463506
CCNF	-0.532664	6.07447	8.42085	0.00370943	0.0463506
MARCH1	0.96229	1.14823	8.40133	0.00374946	0.0468146
HDGF	-0.544708	9.81204	8.39476	0.00376305	0.046931
MACROD1	-0.54106	6.89091	8.39268	0.00376735	0.046931
TEAD2	-0.531758	6.09381	8.39216	0.00376843	0.046931
RABL2B	0.655528	3.38512	8.3912	0.00377041	0.046931
ARRB2	-0.535855	5.39288	8.38218	0.00378917	0.0471281
TTC7B	-0.53545	5.40808	8.38004	0.00379364	0.0471474
RPL12	-0.543804	10.0704	8.3758	0.00380251	0.0471569
TMSB10	-0.543982	9.8607	8.37437	0.0038055	0.0471569
DNAJC10	0.540833	6.93093	8.37397	0.00380632	0.0471569
ZNF658	0.771511	2.26298	8.37393	0.00380642	0.0471569
SLC44A3	1.14468	0.408086	8.37269	0.003809	0.0471569
LUZP1	-0.531799	6.1759	8.36237	0.00383071	0.0473893
NLGN2	-0.535642	6.46626	8.36057	0.00383451	0.0473999
ST3GAL4	-0.5332	6.28985	8.3588	0.00383824	0.0474097
HCN2	0.737168	2.5375	8.34752	0.00386214	0.047573
CIP2A	0.529099	5.75398	8.34586	0.00386566	0.047573
WNT7B	-0.548261	5.00058	8.34281	0.00387217	0.047573
THOC1	0.540922	5.15923	8.34161	0.00387473	0.047573
RGPD8	0.897017	1.46357	8.34106	0.00387589	0.047573
FGFRL1	-0.540676	7.02643	8.3409	0.00387624	0.047573
AC024560.2	0.991808	1.01535	8.33983	0.00387853	0.047573
AF129075.1	1.72083	-1.0763	8.33974	0.00387872	0.047573
MYL10	1.42131	-0.392818	8.33824	0.00388191	0.047573
LINC02482	1.63208	-0.904887	8.33793	0.00388258	0.047573
ZDHHC17	0.541278	5.14353	8.33733	0.00388387	0.047573
NR1H2	-0.540501	7.06274	8.32552	0.00390919	0.0478468
CHRNA10	1.30528	-0.0911052	8.32383	0.00391283	0.0478472
CCDC15	0.754277	2.37223	8.32257	0.00391555	0.0478472
CYC1	-0.54089	11.4194	8.32138	0.00391811	0.0478472
ITPK1	-0.540414	7.08097	8.31751	0.00392648	0.0479131
ATF7IP2	0.75014	2.39755	8.30953	0.00394375	0.0480875
PITX1	-0.541747	7.25046	8.30788	0.00394735	0.0480951
RPLP2	-0.542396	9.28393	8.30491	0.00395381	0.0481083
DEAF1	-0.534103	6.48625	8.30464	0.00395439	0.0481083
GAPDH	-0.539765	11.9328	8.29792	0.00396904	0.0482502
NBN	0.535419	6.62064	8.29452	0.00397649	0.0483044
DVL1	-0.543041	8.52879	8.28997	0.00398647	0.0483778
TARDBP	0.535796	6.68808	8.28692	0.00399317	0.0483778
PCM1	0.528214	6.0524	8.28641	0.00399428	0.0483778
TWIST1	-0.563332	4.6588	8.28524	0.00399687	0.0483778
TNFRSF21	-0.54371	7.71576	8.28491	0.00399758	0.0483778
ARHGDIB	0.734996	2.52638	8.28071	0.00400684	0.0483778
FANCG	-0.536234	5.25862	8.28062	0.00400704	0.0483778
GPI	-0.541491	9.36712	8.28032	0.00400772	0.0483778
AC015712.6	0.720565	2.65383	8.27879	0.00401108	0.0483778
SSR4	-0.543057	8.02605	8.27722	0.00401455	0.0483778
IL17RD	-0.596027	4.1643	8.27679	0.0040155	0.0483778
FAM13B	0.616531	3.84044	8.27114	0.00402801	0.0484924
CCDC183	1.20345	0.186503	8.26251	0.00404721	0.0486871
MARCKSL1	-0.542269	8.24775	8.26021	0.00405234	0.0487125
AC020916.1	0.555483	4.79377	8.25658	0.00406047	0.0487739
ENO3	0.753733	2.35068	8.24864	0.00407825	0.0489085
NUF2	0.533324	5.32214	8.24864	0.00407826	0.0489085
DENND1B	0.612274	3.89864	8.24753	0.00408076	0.0489085
ZNF337	0.844227	1.76641	8.24598	0.00408423	0.0489138
ZC3H7B	-0.531319	6.42547	8.24354	0.00408973	0.0489433
PRAC1	-0.536209	5.20494	8.23698	0.00410453	0.0490603
SCG2	1.45716	-0.549159	8.23652	0.00410558	0.0490603
LTB4R2	0.910846	1.36214	8.23032	0.00411963	0.0491918
HSD17B2	-0.641211	3.4771	8.22562	0.00413031	0.0492828
ATG9A	-0.531706	5.35068	8.2158	0.00415271	0.0494827
RPS20	-0.54006	8.83255	8.21482	0.00415496	0.0494827
MAST2	-0.53519	6.8804	8.21426	0.00415625	0.0494827
WBP4	0.666559	3.15866	8.20699	0.00417293	0.0496446
AC007038.1	1.55419	-0.7895	8.20322	0.0041816	0.0497112
ADGRG6	0.52696	6.21035	8.19612	0.004198	0.0498677
JADE2	-0.534294	6.85408	8.19485	0.00420094	0.0498677
ZNF140	1.13385	0.398092	8.19246	0.00420648	0.0498967
LINC00174	0.892002	1.44467	8.17759	0.00424111	0.0502631
RPL41	-0.538193	9.26237	8.17653	0.00424359	0.0502631
RPL15P3	-0.52676	6.26203	8.17189	0.00425446	0.0503186
KAZALD1	-0.528476	6.39122	8.1708	0.004257	0.0503186
LAMA3	0.525255	6.14197	8.17018	0.00425847	0.0503186
ULBP1	1.00946	0.898522	8.16809	0.00426338	0.0503186
MYO5A	0.524047	5.93049	8.16788	0.00426387	0.0503186
DBP	-0.68325	2.9585	8.16521	0.00427015	0.0503236
CUEDC1	-0.524633	6.11527	8.1638	0.00427346	0.0503236
OAS1	0.523641	5.83477	8.16318	0.00427494	0.0503236
CLIC3	0.864897	1.61171	8.16239	0.00427679	0.0503236
ADTRP	1.41337	-0.448558	8.16109	0.00427987	0.0503236
PPP1R12A	0.523565	5.98937	8.14885	0.00430886	0.0506275
COL24A1	1.46993	-0.598077	8.14377	0.00432093	0.0507186
SERINC1	0.530548	6.6258	8.14295	0.00432289	0.0507186
LIMD1	-0.530504	6.62831	8.14019	0.00432949	0.050759
SACS	0.526355	6.31481	8.13629	0.0043388	0.0508032
ERO1A	0.534058	7.03871	8.13598	0.00433954	0.0508032
WNT10B	-0.54708	4.87776	8.13314	0.00434634	0.0508459
EPHB2	-0.525396	6.26868	8.12535	0.00436506	0.0510088
SOGA1	-0.538529	7.63785	8.12471	0.00436659	0.0510088
RPSAP19	-0.726792	2.5147	8.12235	0.00437227	0.0510383
PPP3CB-AS1	0.837897	1.75656	8.11755	0.00438387	0.0511367
EIF3L	-0.532849	6.98764	8.11359	0.00439347	0.0512117
RPS10P3	-0.982389	0.968147	8.1058	0.00441238	0.0513949
SBSPON	1.29076	-0.104347	8.09861	0.00442992	0.0515621
NT5C3B	-0.520988	5.7301	8.09325	0.00444304	0.0516775
PACSIN3	-0.521861	6.03218	8.09078	0.00444909	0.0517107
ZNF671	1.35889	-0.302652	8.0882	0.00445545	0.0517473
FMO4	0.906323	1.33972	8.0828	0.00446874	0.051857
TPR	0.521117	5.93244	8.07799	0.00448062	0.051857
CHURC1	0.553406	4.71435	8.07768	0.00448138	0.051857
KLHL13	-0.529876	5.24044	8.07471	0.00448873	0.051857
BISPR	1.51446	-0.717189	8.07361	0.00449145	0.051857
SLC2A4RG	-0.53396	7.25138	8.07273	0.00449364	0.051857
AGRN	-0.535326	8.8399	8.07212	0.00449514	0.051857
PIGK	0.523871	6.28768	8.072	0.00449545	0.051857
MT-RNR2	-0.531863	12.5927	8.07101	0.00449791	0.051857
LRFN3	-0.612599	3.78996	8.07042	0.00449938	0.051857
PGAM5	-0.536694	7.62366	8.07007	0.00450023	0.051857
BORA	0.661498	3.15301	8.06514	0.0045125	0.0519613
ZDHHC23	0.740525	2.38521	8.06076	0.00452342	0.0520499
CKAP2L	0.540916	4.94964	8.05155	0.00454646	0.0522778
F12	-0.525944	5.35859	8.04941	0.00455185	0.0523025
AC016596.1	-0.614744	3.73772	8.04249	0.00456926	0.0524415
FOXQ1	1.06347	0.646178	8.04161	0.00457148	0.0524415
ROCK2	0.523819	6.35817	8.04074	0.00457368	0.0524415
SLTM	0.519797	5.95656	8.03788	0.00458092	0.05245
RNF223	1.48302	-0.650764	8.03787	0.00458093	0.05245
LIG4	0.642688	3.35745	8.03282	0.00459372	0.0525592
ABCC5	0.519983	6.0901	8.02728	0.0046078	0.052683
EEF1A1P6	-0.574148	4.34668	8.02325	0.00461807	0.0527419
RALB	0.519248	5.88528	8.02239	0.00462027	0.0527419
CHM	0.521701	5.48487	8.0212	0.0046233	0.0527419
SNPH	1.03826	0.761196	8.01889	0.00462919	0.0527419
AC140479.2	1.06575	0.614041	8.01885	0.00462929	0.0527419
MRPL41	-0.527922	6.80827	8.01499	0.00463917	0.0527942
FRMD6	0.531381	5.12584	8.01291	0.00464451	0.0527942
NIPSNAP1	-0.52705	6.71854	8.01164	0.00464777	0.0527942
SLC16A4	1.2109	0.092437	8.01151	0.00464809	0.0527942
ARL13B	0.595725	4.00982	8.01068	0.00465023	0.0527942
CICP14	0.693171	2.80098	8.00424	0.0046668	0.0529305
AC016738.1	1.08051	0.550256	8.00347	0.00466879	0.0529305
ANGPT1	0.820968	1.81195	7.9956	0.00468913	0.0531237
CYFIP2	-0.690804	2.80572	7.99187	0.00469878	0.0531757
CCDC38	1.69079	-1.09597	7.99019	0.00470315	0.0531757
NRIP2	0.982737	0.959319	7.99002	0.0047036	0.0531757
CA11	-0.647378	3.27529	7.98426	0.00471859	0.0532704
AC087481.3	0.834967	1.73549	7.98315	0.00472146	0.0532704
CR381653.1	1.45555	-0.600577	7.98299	0.00472188	0.0532704
JMJD1C	0.527878	6.92643	7.98141	0.00472601	0.0532798
ZNF594	0.700062	2.71328	7.97653	0.00473878	0.0533273
GPC1	-0.532023	7.38248	7.9765	0.00473885	0.0533273
NCAPH2	-0.520036	5.49533	7.97601	0.00474013	0.0533273
PHC3	0.517339	5.79891	7.97233	0.00474977	0.0533847
HIP1	-0.523318	5.36435	7.97154	0.00475185	0.0533847
H6PD	-0.526334	5.25098	7.96974	0.00475657	0.0534006
ARR3	1.60063	-0.931964	7.96733	0.00476291	0.0534347
ABTB1	-0.629142	3.49695	7.96201	0.00477694	0.0535548
AC026403.1	-0.61948	3.62571	7.95853	0.00478613	0.0536206
NBEAP1	-0.635359	3.40512	7.95495	0.0047956	0.0536894
LPXN	0.54849	4.72977	7.95238	0.00480241	0.0537284
PAXIP1-AS2	0.696382	2.73778	7.9472	0.00481619	0.0538453
HOMER2	-0.570833	4.35223	7.93807	0.00484055	0.0540692
RWDD3	1.02266	0.783767	7.93655	0.00484461	0.0540692
AC009404.1	0.914912	1.24038	7.93593	0.00484627	0.0540692
PPP1R9B	-0.532041	7.5791	7.92897	0.00486494	0.0542401
CACNG4	-1.43897	-0.641985	7.92361	0.00487939	0.0542923
DCXR	-0.524153	6.72752	7.92358	0.00487945	0.0542923
ZNF37A	0.541065	4.85581	7.92349	0.00487971	0.0542923
THBD	1.09572	0.471721	7.91711	0.00489694	0.0544401
RNF6	0.543631	4.79695	7.91546	0.00490141	0.0544401
PRRC2A	-0.530047	8.82483	7.91384	0.0049058	0.0544401
ZNF628	-0.527297	5.14325	7.91348	0.00490678	0.0544401
BNIP3	-0.531149	7.79356	7.91234	0.00490986	0.0544401
UBA52	-0.52867	9.51513	7.90055	0.00494198	0.0547286
ERV3-1	0.818626	1.80344	7.90012	0.00494316	0.0547286
ARFGEF3	-0.535997	4.94396	7.89906	0.00494605	0.0547286
CADM4	-0.849906	1.58474	7.89276	0.00496332	0.0548821
TENM3	-0.683758	2.82819	7.88977	0.00497152	0.0549119
FAM171A1	-0.668026	2.99299	7.8893	0.00497282	0.0549119
ZNF644	0.513841	5.64152	7.88196	0.00499303	0.0550974
FAM111B	0.649979	3.19441	7.87977	0.00499908	0.0551265
FLJ42351	0.980839	0.930575	7.86458	0.00504125	0.0555396
THAP4	-0.51956	6.48544	7.86117	0.00505077	0.0555396
ARRDC4	0.659315	3.08395	7.86008	0.00505381	0.0555396
IGFN1	1.55609	-0.868219	7.85999	0.00505408	0.0555396
APC	0.544443	4.74311	7.85976	0.00505471	0.0555396
OSBPL7	0.554006	4.57151	7.85814	0.00505923	0.0555396
LINC02293	1.32633	-0.255949	7.85764	0.00506063	0.0555396
CCDC91	0.620212	3.56226	7.85082	0.00507977	0.0557118
RGS2	-0.51731	6.35511	7.84862	0.00508595	0.0557346
EIF3I	-0.528285	8.5147	7.84762	0.00508875	0.0557346
SPATA1	1.55385	-0.86727	7.83752	0.00511729	0.056007
WDTC1	-0.519857	6.56881	7.83636	0.00512056	0.056007
SCN2A	1.01582	0.794504	7.83316	0.00512964	0.0560565
FBLN1	-0.762951	2.12646	7.83232	0.00513203	0.0560565
AGAP3	-0.525775	7.24306	7.8309	0.00513605	0.0560625
MME	0.853357	1.55676	7.82737	0.00514609	0.0560986
PPP1R15A	0.512358	5.767	7.82729	0.00514631	0.0560986
COQ8A	-0.518826	6.53824	7.81912	0.00516965	0.056315
AL645608.1	1.67228	-1.09388	7.81315	0.00518673	0.0564629
AC145098.2	0.899861	1.27944	7.80832	0.00520063	0.0565762
DCN	-1.46771	-0.750906	7.80614	0.00520689	0.0566061
NME9	1.32173	-0.254278	7.80255	0.00521724	0.056644
SUSD3	-0.945099	1.0419	7.8025	0.0052174	0.056644
GSPT2	0.511349	5.6903	7.80116	0.00522127	0.056648
MFSD3	-0.513562	6.18314	7.79833	0.00522945	0.0566986
NFAT5	0.515649	5.43845	7.79653	0.00523466	0.0567108
CEP70	0.543669	4.7112	7.79347	0.00524355	0.0567108
ZNF845	0.586452	4.02797	7.79342	0.00524369	0.0567108
SKI	-0.525387	7.33503	7.79309	0.00524463	0.0567108
PPM1K	0.595292	3.89278	7.78803	0.00525936	0.056832
BX679664.3	-0.553561	4.53261	7.78274	0.00527477	0.0569604
C8orf33	-0.52404	7.25077	7.77786	0.00528903	0.0570762
USO1	0.511275	5.95237	7.77568	0.00529542	0.0571071
HERC4	0.518806	6.70559	7.76851	0.0053165	0.0572443
GPR20	1.41831	-0.562507	7.76768	0.00531894	0.0572443
TMEM154	0.640492	3.25302	7.76744	0.00531963	0.0572443
SLC7A8	-0.511406	6.07851	7.76653	0.00532233	0.0572443
NF2	-0.518113	6.65176	7.76057	0.00533993	0.0573953
MYOM1	1.08595	0.461163	7.756	0.00535343	0.0575022
SENP6	0.510081	5.8071	7.75466	0.0053574	0.0575066
TTN	0.606987	3.69504	7.75057	0.00536956	0.0575987
ELOB	-0.525694	7.69568	7.74779	0.00537784	0.0576444
MRPL37	-0.525044	8.24484	7.74605	0.005383	0.0576444
RPL7AP6	-0.575229	4.18112	7.74555	0.00538452	0.0576444
HAPLN3	1.10662	0.373617	7.74257	0.00539341	0.0576701
ITPR3	-0.525241	7.93184	7.74235	0.00539407	0.0576701
MIR99AHG	1.4616	-0.689648	7.73523	0.00541538	0.0578203
CLDN1	1.62055	-1.02514	7.73479	0.00541668	0.0578203
ZMYM5	0.692464	2.67351	7.73406	0.00541886	0.0578203
GOLM1	0.522154	7.22208	7.72893	0.00543431	0.0579468
CSNK1G2	-0.522869	7.30582	7.72759	0.00543834	0.0579515
KANSL1L	0.659394	3.01476	7.72637	0.005442	0.0579522
GPCPD1	0.580778	4.07623	7.72166	0.00545621	0.0580439
GAMT	-0.517313	6.71406	7.72114	0.0054578	0.0580439
TPSG1	-0.711893	2.48854	7.71825	0.00546653	0.0580817
TUBA1B	-0.521868	10.0847	7.71759	0.00546854	0.0580817
AC005912.1	-0.618763	3.50465	7.71635	0.0054723	0.0580834
SPDYA	1.31566	-0.272308	7.70823	0.00549695	0.0582889
ZNF254	0.626889	3.39092	7.7076	0.00549888	0.0582889
LINC00824	0.719019	2.42997	7.70583	0.00550429	0.0583079
PPP1R16A	-0.508749	5.97412	7.69892	0.00552538	0.0584779
CLPB	-0.51357	6.44235	7.6982	0.00552758	0.0584779
RAB40C	-0.507785	5.64696	7.69647	0.00553288	0.0584956
REV3L	0.547079	4.58416	7.68672	0.00556287	0.0587503
DDX54	-0.519958	7.14268	7.68627	0.00556424	0.0587503
IL9RP3	1.05615	0.549862	7.68448	0.00556978	0.0587703
MRPS34	-0.522851	8.10741	7.67849	0.00558828	0.0589064
TRPC1	0.584477	3.9914	7.67795	0.00558998	0.0589064
VAT1	-0.516563	6.82401	7.66999	0.00561467	0.059128
EBLN2	1.0539	0.55897	7.66854	0.00561918	0.0591369
N4BP2	0.64668	3.13327	7.66417	0.00563282	0.0592419
ITGA2	0.507516	5.94144	7.6624	0.00563836	0.0592592
THAP9-AS1	0.54835	4.54528	7.66129	0.00564181	0.0592592
HECTD1	0.522525	7.52286	7.65681	0.00565584	0.059364
KHDC4	0.507126	5.92666	7.65576	0.00565914	0.059364
PIGO	-0.519652	5.1164	7.6526	0.00566905	0.0594293
TUG1	0.511144	6.38874	7.64597	0.00568992	0.0596094
AGPAT3	-0.517669	7.06569	7.63965	0.00570991	0.0597801
PPP1R14B	-0.520565	8.90088	7.63838	0.00571393	0.0597833
TBCD	-0.515056	6.79509	7.63304	0.00573086	0.0599216
PARGP1	0.879751	1.33417	7.63116	0.00573683	0.0599453
CRTAP	-0.520793	8.52477	7.62788	0.00574729	0.0600157
UQCRQ	-0.515094	6.84192	7.62486	0.00575692	0.0600453
IRAK1	-0.519051	9.68591	7.62258	0.0057642	0.0600453
LPAL2	1.011	0.739235	7.62244	0.00576465	0.0600453
EEF1A1P19	1.3526	-0.416804	7.62176	0.00576681	0.0600453
EDRF1	0.540786	4.64906	7.62081	0.00576986	0.0600453
GPAA1	-0.518511	10.1163	7.62	0.00577244	0.0600453
MAB21L3	0.869825	1.38704	7.61782	0.00577943	0.0600748
MBNL1	0.521124	7.76348	7.61679	0.00578272	0.0600748
CDRT15P1	1.12032	0.285981	7.61493	0.0057887	0.0600983
EEF1A1	-0.516364	12.617	7.61038	0.00580331	0.0601981
RASD1	-0.983206	0.828598	7.60962	0.00580577	0.0601981
CEP170P1	1.25385	-0.117167	7.60325	0.00582632	0.0603723
DHRS13	-0.954135	0.949958	7.60183	0.0058309	0.0603811
SLC25A39	-0.519191	8.8013	7.59407	0.00585605	0.0606026
CTBP1	-0.511173	6.54653	7.58841	0.00587448	0.0607544
EEF1B2	-0.519497	8.25184	7.5848	0.00588623	0.060837
RBBP8	0.511096	6.5599	7.58086	0.00589913	0.0609313
SLC9A3R1	-0.504425	5.86484	7.57917	0.00590467	0.0609494
TRAP1	-0.518947	8.47061	7.57327	0.00592402	0.0611102
AC005785.1	1.31886	-0.328079	7.56885	0.00593857	0.0611948
SLIT2	0.608083	3.57861	7.56847	0.00593981	0.0611948
AC084824.5	1.52714	-0.860562	7.56711	0.00594431	0.0611999
FKBP8	-0.518608	8.55707	7.56602	0.00594789	0.0611999
AF117829.1	0.732567	2.2534	7.55572	0.005982	0.0615118
CWF19L2	0.575385	4.04728	7.53685	0.00604496	0.0620864
AP000251.1	-1.24559	-0.148934	7.53667	0.00604558	0.0620864
CTSK	1.07992	0.414477	7.53531	0.00605012	0.0620936
ZBTB12	-0.612462	3.48734	7.53183	0.00606182	0.0621741
ZNF10	0.783081	1.89562	7.52614	0.00608101	0.0623313
SEMA3F	-0.517422	8.25358	7.52392	0.00608849	0.0623684
ANGPTL4	-0.505341	5.47436	7.52053	0.00609999	0.062388
TBX22	1.64716	-1.12335	7.51971	0.00610273	0.062388
F2RL2	1.249	-0.121815	7.5196	0.00610313	0.062388
AC036214.1	1.07212	0.442787	7.51879	0.00610586	0.062388
AC012676.5	0.890565	1.2389	7.51267	0.00612663	0.0625606
TLE3	-0.51021	6.72038	7.50998	0.00613581	0.0625688
MIR186	1.24924	-0.130574	7.5097	0.00613675	0.0625688
TMEM250	-0.510738	6.79084	7.50803	0.00614246	0.0625688
ICOSLG	-0.648312	3.03663	7.50741	0.00614458	0.0625688
SH3RF3-AS1	-0.666517	2.83399	7.50675	0.00614681	0.0625688
FAM84A	-0.523642	4.91116	7.49973	0.00617083	0.0627737
SNRPD2	-0.514833	7.31143	7.49249	0.0061957	0.062987
MXD4	-0.500971	5.61162	7.48747	0.00621297	0.0630571
NNAT	0.925248	1.06022	7.48736	0.00621335	0.0630571
TNKS1BP1	-0.515094	7.35449	7.48699	0.00621464	0.0630571
IBTK	0.502853	6.16683	7.48574	0.00621894	0.0630571
SLC7A11	0.50102	5.78974	7.48482	0.00622213	0.0630571
GAB3	1.20866	-0.0259029	7.48158	0.00623332	0.063131
AC083798.2	1.14416	0.169578	7.47673	0.00625013	0.0632615
FGD1	-0.511913	5.16274	7.47399	0.00625968	0.0633185
DDR2	0.963314	0.893967	7.4673	0.00628298	0.0635143
MARCH2	-0.586588	3.82979	7.46476	0.00629184	0.0635641
DTWD1	0.618416	3.36898	7.46008	0.00630822	0.0636552
TBC1D8-AS1	1.41347	-0.631814	7.45993	0.00630874	0.0636552
CAD	-0.51557	7.81108	7.45744	0.00631747	0.0636934
NEBL	-0.501853	5.52751	7.45552	0.00632422	0.0636934
NDE1	-0.505227	5.39184	7.45548	0.00632436	0.0636934
SSTR2	1.35623	-0.481834	7.45381	0.00633023	0.0637079
AC087741.1	0.734291	2.20218	7.45282	0.0063337	0.0637079
AC025287.3	1.63951	-1.1203	7.44953	0.00634529	0.0637567
GEM	0.538497	4.587	7.44893	0.00634741	0.0637567
WHAMMP2	0.780103	1.88206	7.4455	0.00635952	0.0637567
PTPDC1	0.57945	3.92881	7.44549	0.00635955	0.0637567
NT5C3AP1	1.23145	-0.0945712	7.44484	0.00636187	0.0637567
PTCH1	-0.746972	2.09824	7.44473	0.00636224	0.0637567
BOLA2B	-0.941195	0.95708	7.44191	0.00637221	0.063817
MAPK12	-0.499894	5.9213	7.43912	0.0063821	0.0638764
CISD3	-0.510822	5.15227	7.4378	0.00638679	0.0638837
PTGDR2	1.63788	-1.11984	7.43479	0.00639748	0.063951
PRAF2	1.41092	-0.631598	7.43305	0.00640368	0.0639734
AP003469.4	1.15179	0.127594	7.42501	0.00643235	0.0642201
AC112907.3	0.813139	1.66158	7.42334	0.00643831	0.0642398
AC016734.1	-0.52107	4.90661	7.42157	0.00644465	0.0642634
PCDHA6	1.4317	-0.682389	7.41935	0.00645263	0.0642713
BRI3BP	-0.499577	6.04259	7.41913	0.00645341	0.0642713
ZNF222	1.12344	0.221407	7.41578	0.00646542	0.0643513
PTOV1-AS2	0.802986	1.73969	7.41458	0.00646973	0.0643545
FAM230C	0.975722	0.831065	7.4101	0.00648586	0.064375
RPS15A	-0.503276	6.40614	7.41009	0.00648592	0.064375
TMPRSS9	0.761383	1.99861	7.40927	0.00648888	0.064375
ARHGAP5	0.500226	6.1609	7.40923	0.006489	0.064375
USP15	0.502905	6.38424	7.40713	0.0064966	0.064375
SYT7	-0.506142	6.66155	7.40586	0.00650118	0.064375
FER1L4	0.498135	5.67756	7.40498	0.00650437	0.064375
SEC14L1P1	0.969118	0.85945	7.40376	0.00650877	0.064375
RAD52	0.597162	3.63482	7.4033	0.00651042	0.064375
INHBB	-1.37572	-0.615647	7.40275	0.00651241	0.064375
DMTN	-0.974948	0.812957	7.40186	0.00651566	0.064375
AL022323.4	1.4541	-0.743616	7.39839	0.00652825	0.0644243
LCTL	1.5908	-1.04923	7.39828	0.00652863	0.0644243
PCIF1	-0.502159	5.4264	7.39194	0.00655167	0.0646122
YBX1	-0.509688	11.2391	7.39027	0.00655775	0.0646327
ACTR1B	-0.504497	5.32822	7.38656	0.00657129	0.0647266
LRRC20	-0.497718	5.81318	7.38375	0.00658157	0.0647637
CTIF	-0.549878	4.36125	7.38334	0.00658308	0.0647637
ANKRD50	0.506093	5.26583	7.38197	0.00658809	0.0647736
CLPP	-0.510319	7.24821	7.37841	0.00660115	0.0648624
AC106037.2	1.36638	-0.530949	7.37465	0.00661496	0.0649156
ADAMTS3	0.564936	4.11954	7.37387	0.00661783	0.0649156
MRPL53	0.884829	1.22661	7.37365	0.00661863	0.0649156
AL390879.1	0.730952	2.19671	7.36808	0.00663919	0.0650707
PLCG1	-0.507911	7.02508	7.36622	0.00664605	0.0650707
AC084018.1	0.950013	0.920197	7.36535	0.00664926	0.0650707
AL138921.2	1.45442	-0.767043	7.365	0.00665056	0.0650707
LINC00894	1.08057	0.363869	7.35967	0.0066703	0.0652243
CTSW	1.6293	-1.12342	7.35518	0.006687	0.065348
EPHB4	-0.511913	7.51579	7.35276	0.00669597	0.065359
SLC29A4	-0.641901	3.03088	7.3527	0.00669622	0.065359
GCNT3	1.3134	-0.365226	7.34784	0.00671435	0.0654963
ZDHHC9	-0.508002	7.11867	7.34458	0.00672653	0.0655364
ARHGEF3	-0.499353	5.47288	7.34457	0.00672657	0.0655364
FAM13A-AS1	1.58478	-1.04879	7.34213	0.00673568	0.0655742
SDHAP1	0.583865	3.79094	7.34136	0.00673858	0.0655742
AL050343.1	1.34586	-0.482644	7.33839	0.00674972	0.065643
OPTN	0.603445	3.50991	7.33638	0.00675726	0.0656769
WDR18	-0.496016	5.80252	7.33488	0.00676293	0.0656924
SFXN3	-0.500898	6.42146	7.33351	0.00676807	0.0657028
TMEM159	-0.53362	4.58964	7.32695	0.00679283	0.0659035
TTN-AS1	1.10848	0.248621	7.32571	0.0067975	0.0659092
DCUN1D2-AS	1.62534	-1.11823	7.31908	0.00682264	0.0661133
GPC4	-0.502867	6.64605	7.3152	0.00683739	0.0661878
CACNB2	1.03146	0.544659	7.3139	0.00684232	0.0661878
ERAP1	0.504661	5.23242	7.31282	0.00684646	0.0661878
LRP4	-0.556709	4.21538	7.31274	0.00684673	0.0661878
AC019080.1	1.28332	-0.284744	7.31107	0.00685309	0.0662097
RTN4R	-0.594449	3.61131	7.30598	0.00687253	0.0663578
FYB1	1.03654	0.517936	7.29834	0.00690185	0.066601
AC245100.4	0.8717	1.27291	7.2941	0.00691813	0.0667182
ATP5F1D	-0.509966	7.64972	7.29173	0.00692726	0.0667664
GCNT7	1.54148	-0.977884	7.28996	0.00693411	0.0667925
MT-TT	-0.734008	2.13008	7.2865	0.00694746	0.0668812
NPAT	0.525844	4.70328	7.28209	0.00696454	0.0670057
PGM1	-0.50931	7.51397	7.27906	0.00697631	0.0670631
CNEP1R1	0.624868	3.19405	7.27841	0.00697882	0.0670631
CCDC136	0.729698	2.17843	7.27574	0.00698922	0.0671053
TMEM92	0.802664	1.69187	7.27458	0.00699371	0.0671053
NOVA2	-0.700083	2.40738	7.27408	0.00699568	0.0671053
TRIM7	-0.510333	5.02038	7.26426	0.00703404	0.0674332
FAM208B	0.499721	6.52117	7.26216	0.00704226	0.067472
ERGIC2	0.502679	6.85652	7.25818	0.00705787	0.0675814
AKR1B1	0.976465	0.785407	7.256	0.00706644	0.0676234
HSP90B1	0.506125	9.6353	7.24802	0.00709791	0.0678843
ECSIT	-0.49995	6.58331	7.24601	0.00710587	0.0679035
SPATC1	1.50338	-0.910561	7.24539	0.00710833	0.0679035
C2CD5	0.504659	5.12974	7.23773	0.00713871	0.0681533
DAB2IP	-0.493023	5.92306	7.23615	0.00714502	0.0681733
SCARA5	-0.574952	3.86355	7.23134	0.00716419	0.0682785
USP16	0.502699	5.18644	7.23126	0.00716451	0.0682785
KIAA1211	-0.89764	1.09786	7.22977	0.00717043	0.0682947
FAM43A	-0.497245	5.393	7.22475	0.00719053	0.0684155
ETFRF1	0.674981	2.61817	7.22315	0.00719694	0.0684155
ASIC2	-1.0738	0.312247	7.22301	0.00719747	0.0684155
SF3A3P1	-1.44506	-0.844757	7.22203	0.00720141	0.0684155
ASB13	-0.49205	5.77038	7.22082	0.00720629	0.0684155
RPS13	-0.506595	8.52395	7.22026	0.00720855	0.0684155
TTC28	-0.508697	5.02404	7.21812	0.00721714	0.0684568
RIMKLBP2	1.30343	-0.388384	7.2112	0.00724499	0.0686806
PAQR6	0.705816	2.33047	7.20767	0.00725925	0.0687518
AC099560.2	-0.699728	2.37823	7.20672	0.0072631	0.0687518
HIST1H1C	0.550028	4.25498	7.20541	0.0072684	0.0687518
PARVB	-0.492307	5.57136	7.20481	0.00727085	0.0687518
MXI1	-0.491795	5.90506	7.20408	0.00727379	0.0687518
STUB1	-0.502936	7.1367	7.19583	0.00730733	0.0689934
VAMP1	0.63088	3.07104	7.19569	0.0073079	0.0689934
PGAM1	-0.503758	9.72245	7.18346	0.00735788	0.0694247
ARMH4	-0.620957	3.18432	7.17909	0.00737582	0.06952
NDUFV1	-0.5054	8.15565	7.17828	0.00737914	0.06952
EMP3	-0.490807	5.87519	7.17785	0.0073809	0.06952
HRAS	-0.491643	6.11868	7.17421	0.00739592	0.0696208
Z94721.3	1.52887	-0.979314	7.16979	0.00741414	0.0696923
FTH1P8	-0.581982	3.71003	7.16941	0.00741572	0.0696923
PITPNC1	-0.491382	6.1087	7.16923	0.00741646	0.0696923
CORO2A	-0.584501	3.67754	7.16737	0.00742414	0.0697238
ABCD1	-0.505424	7.70021	7.1643	0.00743688	0.0698029
RPS2P55	-0.915064	0.99605	7.16244	0.00744458	0.0698283
USP18	0.647336	2.88338	7.16104	0.00745038	0.0698283
EMC3-AS1	0.638935	2.96784	7.16052	0.00745256	0.0698283
FER1L6	0.596717	3.49467	7.15943	0.00745711	0.0698303
FAM86B3P	0.888117	1.13725	7.15727	0.00746607	0.0698423
ANKRD12	0.558745	4.08175	7.15704	0.00746704	0.0698423
PAIP1	0.496444	6.55886	7.15381	0.00748048	0.0698938
PHKA1P1	-0.699602	2.35524	7.153	0.00748389	0.0698938
RGS10	-0.537849	4.41237	7.15168	0.00748937	0.0698938
MAN2A1	0.49676	5.31476	7.15156	0.00748986	0.0698938
TEX52	1.36371	-0.57905	7.14631	0.00751186	0.0700348
RPSAP58	-0.524343	4.63254	7.14537	0.00751578	0.0700348
AKAP6	0.676313	2.57112	7.14484	0.00751799	0.0700348
PLIN4	-0.493446	6.34831	7.14222	0.00752899	0.0700969
VPS13A	0.490314	6.09997	7.14055	0.00753599	0.0701216
MRPL30	-0.489202	5.77687	7.13904	0.00754235	0.0701404
C12orf4	0.529085	4.54834	7.13782	0.00754748	0.0701477
ACTG1P3	1.46232	-0.845651	7.1351	0.00755892	0.0702136
HOXA9	0.499226	5.18708	7.13209	0.00757166	0.0702915
BAHD1	-0.488839	5.75786	7.12814	0.00758835	0.0703792
CHMP2A	-0.498438	6.89423	7.12779	0.00758982	0.0703792
AC063952.1	0.93046	0.936029	7.12443	0.00760407	0.0704708
MIR3648-1	1.43048	-0.764111	7.12214	0.00761378	0.0705203
ABI3BP	-0.503657	7.81649	7.1195	0.00762499	0.0705733
LINC00843	1.36112	-0.578778	7.11866	0.00762859	0.0705733
AMFR	-0.4981	6.90082	7.11564	0.00764142	0.0705733
ATAT1	0.737308	2.06071	7.11532	0.00764279	0.0705733
ACAP2	0.489128	6.03311	7.11381	0.00764922	0.0705733
ERBB2	-0.505902	5.00298	7.11304	0.00765253	0.0705733
LIN7C	0.491519	5.46552	7.11137	0.00765967	0.0705733
RPL12P14	1.31139	-0.444652	7.11073	0.00766239	0.0705733
GCNT1	1.02721	0.50563	7.11064	0.00766279	0.0705733
NMI	0.547769	4.23266	7.11054	0.00766322	0.0705733
THAP6	0.635177	2.98339	7.10675	0.00767943	0.070657
SDC1	-0.503014	7.49571	7.10621	0.00768171	0.070657
MIR100HG	0.487765	5.63163	7.10535	0.00768544	0.070657
BRSK2	-0.607353	3.31397	7.1032	0.00769465	0.0707014
PLTP	-0.498369	6.99258	7.10202	0.00769971	0.0707077
MAFK	-0.488743	6.05507	7.09985	0.00770903	0.0707216
CATSPERG	1.52144	-0.974908	7.09963	0.00770998	0.0707216
STX10	-0.492042	6.37827	7.09462	0.00773155	0.0708791
ZGRF1	0.633652	2.99068	7.09205	0.00774268	0.0709409
OASL	-0.493034	6.47425	7.08959	0.00775332	0.0709981
MTATP6P1	-0.501942	8.48432	7.08802	0.0077601	0.0710199
CHD9	0.501618	5.07507	7.08375	0.00777859	0.0711488
VWDE	0.630964	3.01629	7.07961	0.00779658	0.0712729
ZNF721	0.67328	2.56253	7.07081	0.007835	0.0715295
HHIPL2	1.26604	-0.311287	7.07052	0.00783625	0.0715295
CRYGS	0.899859	1.05642	7.07013	0.00783794	0.0715295
GPS1	-0.500266	7.35011	7.06612	0.00785553	0.0716495
RNF32	0.808091	1.56289	7.06407	0.00786452	0.071691
XIRP2	1.60305	-1.14429	7.0618	0.0078745	0.0717415
RPL37AP1	-1.27284	-0.398068	7.05535	0.0079029	0.0719596
PUM3	0.486285	5.81276	7.05244	0.00791572	0.0720358
DENND1A	-0.485782	5.68496	7.04391	0.0079535	0.0723131
INTS5	-0.486114	5.81579	7.04354	0.00795516	0.0723131
HOXA10	0.533842	4.40996	7.03873	0.00797654	0.072329
GALK1	-0.511039	4.83109	7.03846	0.00797775	0.072329
APRT	-0.497737	7.17788	7.03832	0.00797836	0.072329
DMKN	0.83837	1.37503	7.03812	0.00797926	0.072329
RPS23	-0.496123	6.99636	7.03811	0.00797931	0.072329
CDKAL1	0.576087	3.72463	7.03166	0.0080081	0.0725404
SLC36A1	-0.49893	5.09355	7.03059	0.00801288	0.0725404
POLRMT	-0.498411	7.28547	7.02987	0.0080161	0.0725404
MT-TY	-0.518719	4.6582	7.02581	0.00803433	0.0726646
SNORD19	1.59873	-1.14641	7.02293	0.00804725	0.0727407
AP2B1	-0.499627	8.40721	7.02137	0.00805428	0.0727503
WHAMMP3	0.6749	2.52214	7.02069	0.00805733	0.0727503
RAB3D	-0.498727	5.08857	7.01832	0.008068	0.0728057
KNOP1	-0.494999	5.19719	7.01729	0.00807265	0.0728057
ITGAV	0.485281	5.88171	7.01632	0.008077	0.0728057
NRARP	-0.485503	5.57565	7.01472	0.00808424	0.0728303
GLB1L2	-0.488915	6.36217	7.00896	0.00811028	0.0730242
FOXA2	-0.590421	3.48766	7.00733	0.00811769	0.0730501
FAM173A	-0.484404	5.73402	7.00472	0.0081295	0.0731157
AC018529.2	1.47794	-0.91174	6.99944	0.00815351	0.0732908
CLTB	-0.494275	6.95574	6.99504	0.0081736	0.0734113
SLF2	0.510432	4.80953	6.99451	0.00817601	0.0734113
CLOCK	0.483884	5.63569	6.99187	0.00818808	0.0734611
SMC2	0.486038	6.18112	6.99131	0.00819066	0.0734611
RUFY3	0.564888	3.87197	6.9893	0.00819985	0.0734748
ZNF519	0.687074	2.39793	6.98898	0.00820129	0.0734748
COX7A2L	-0.488608	6.40948	6.9842	0.00822325	0.0736307
TRIM23	0.665009	2.60131	6.97885	0.00824784	0.0738099
NEIL1	0.798781	1.59669	6.97773	0.00825303	0.0738155
CLIP2	-0.491716	5.27046	6.97267	0.00827641	0.0739836
GDAP1	0.502601	4.95789	6.96824	0.0082969	0.0741232
ANKS6	-0.487645	6.38143	6.9659	0.00830776	0.0741232
CD44-AS1	1.47434	-0.909212	6.96457	0.00831394	0.0741232
AP002884.1	1.33076	-0.5459	6.96444	0.00831457	0.0741232
CCDC85B	-0.498149	7.77809	6.9638	0.00831751	0.0741232
VOPP1	-0.491522	6.76328	6.96336	0.00831958	0.0741232
PPIG	0.483112	5.82335	6.95956	0.00833723	0.0742396
AL390728.6	0.63569	2.89129	6.95222	0.00837152	0.0745037
RPL24	-0.496275	9.02853	6.95036	0.00838024	0.074513
PRADC1	-0.48785	5.38671	6.95003	0.00838179	0.074513
AFF2	-0.507526	4.83259	6.94727	0.00839475	0.0745871
EXTL3	-0.491688	6.86119	6.94398	0.00841016	0.074683
HIBCH	0.501228	4.96544	6.94208	0.00841912	0.0747215
AL157871.5	1.47184	-0.90438	6.94096	0.00842438	0.0747271
ZNF292	0.51052	4.75936	6.93755	0.00844046	0.0748043
SKA3	0.496031	5.08212	6.937	0.00844306	0.0748043
AC068134.3	1.54636	-1.07131	6.93589	0.00844828	0.0748043
STON2	0.636819	2.88021	6.93474	0.00845373	0.0748043
CENPC	0.575693	3.66226	6.93421	0.00845626	0.0748043
CAMKK2	-0.484261	6.19847	6.93313	0.00846136	0.0748084
STARD10	-0.568281	3.77483	6.92929	0.00847954	0.0749281
PACSIN1	-1.24146	-0.329657	6.92489	0.00850041	0.0750495
ZNF337-AS1	0.825316	1.41377	6.92444	0.00850257	0.0750495
CLIP1	0.481864	5.83238	6.92233	0.00851262	0.0750893
HOXA5	0.996093	0.573809	6.92011	0.00852316	0.0750893
FOSB	0.519143	4.57266	6.91974	0.00852493	0.0750893
AC010343.3	0.803663	1.53463	6.91929	0.00852709	0.0750893
RTN2	-0.556261	3.96314	6.91861	0.00853034	0.0750893
LDHA	-0.492213	11.7152	6.90323	0.00860404	0.0756968
CAMK2N1	-0.565028	3.80576	6.90105	0.00861453	0.0757478
TRUB2	-0.490352	6.89934	6.89886	0.0086251	0.0757749
TTK	0.482466	5.53205	6.89763	0.00863102	0.0757749
AL136115.2	1.53665	-1.0417	6.89677	0.00863514	0.0757749
ADCY6	-0.485366	5.41207	6.89604	0.0086387	0.0757749
CCT6P1	0.66229	2.58089	6.89555	0.00864108	0.0757749
BCAP31	-0.494514	8.84134	6.8943	0.00864708	0.0757863
AL136295.5	1.02214	0.456686	6.88429	0.00869568	0.0761592
RORA-AS1	1.30617	-0.497353	6.88302	0.00870186	0.0761592
AL133325.3	1.17463	-0.0750158	6.88262	0.00870378	0.0761592
UTRN	0.508857	4.75352	6.88049	0.00871416	0.0761709
SASS6	0.51885	4.55635	6.88041	0.00871455	0.0761709
ELK1	-0.483559	6.29902	6.87892	0.00872183	0.0761933
FLRT2	-0.492	5.12527	6.87782	0.0087272	0.076199
ANKFN1	1.2002	-0.146711	6.87319	0.00874984	0.076321
ANXA6	-0.489784	6.93469	6.87303	0.00875063	0.076321
GSTM4	-0.529089	4.37972	6.87128	0.00875916	0.0763508
AHCY	-0.494138	8.48255	6.87006	0.00876519	0.0763508
NHP2	-0.490037	6.98583	6.86943	0.00876824	0.0763508
PGM3	0.494564	5.05855	6.86729	0.00877876	0.0764012
MIR22HG	0.564878	3.77965	6.86321	0.00879882	0.0764754
AGPAT2	-0.491926	7.22809	6.86312	0.0087993	0.0764754
CPT1A	-0.494722	7.62495	6.86267	0.00880149	0.0764754
PRDX5	-0.494109	8.05894	6.86033	0.00881302	0.0765344
HMGA1P8	-1.27101	-0.454109	6.85838	0.00882264	0.076551
RAB11FIP2	0.56849	3.72326	6.85802	0.00882441	0.076551
LINC00705	1.46732	-0.93376	6.85457	0.00884147	0.0766391
LRRC7	0.995562	0.55356	6.85405	0.00884406	0.0766391
AC002553.2	1.49992	-0.999991	6.85106	0.00885888	0.0767263
ELOCP19	1.32224	-0.570736	6.84506	0.00888868	0.07692
SLC5A3	0.483325	6.37502	6.84464	0.00889077	0.07692
RPL10A	-0.492529	8.92763	6.84257	0.00890106	0.0769525
NAA16	0.490487	5.12881	6.84162	0.0089058	0.0769525
TMEM108-AS1	0.987112	0.580512	6.84101	0.00890883	0.0769525
C3AR1	1.46558	-0.931636	6.83897	0.008919	0.0769899
EPHX1	-0.485397	6.56979	6.83745	0.00892663	0.0769899
HSPD1P11	1.53545	-1.0708	6.83638	0.00893197	0.0769899
EFEMP1	0.990257	0.569844	6.83632	0.00893224	0.0769899
C4orf33	0.795997	1.5501	6.83188	0.0089545	0.0771406
ZNF585B	1.33911	-0.616032	6.82973	0.0089653	0.0771924
VARS	-0.493074	7.95619	6.82829	0.00897249	0.0772132
RASSF9	0.788897	1.59743	6.82354	0.00899639	0.0773776
MAP3K11	-0.4902	7.21237	6.81872	0.00902071	0.0775125
PPP1CA	-0.492916	7.76947	6.81853	0.00902168	0.0775125
CANT1	-0.490053	7.20254	6.81717	0.00902854	0.0775301
AL031963.3	1.4629	-0.931817	6.81374	0.00904594	0.0776383
TTC37	0.485201	6.65255	6.81163	0.00905659	0.0776884
SLC39A4	-0.478367	5.57337	6.81041	0.00906282	0.0777006
HM13-IT1	1.1067	0.108651	6.8048	0.00909131	0.0779034
POLK	0.577401	3.55196	6.80366	0.00909711	0.0779118
WDR81	-0.478091	5.98188	6.80032	0.00911414	0.0779475
MGAT1	-0.490105	7.2787	6.80031	0.00911418	0.0779475
PGPEP1	-0.506708	4.73297	6.8	0.00911577	0.0779475
MDH1B	1.12114	0.070365	6.79845	0.00912368	0.0779739
LRIF1	0.513709	4.5923	6.79496	0.00914155	0.0780807
GLIPR2	0.592444	3.34331	6.79393	0.00914682	0.0780807
MTRF1	0.61907	3.00057	6.79318	0.00915068	0.0780807
RPS4X	-0.48921	10.2562	6.79082	0.00916278	0.0781426
RPL23	-0.491607	7.99885	6.78984	0.00916779	0.0781441
TMEM263	0.479051	6.20871	6.78224	0.00920695	0.078383
C19orf70	-0.478799	6.19351	6.78159	0.00921027	0.078383
SIRPA	-0.478556	6.16901	6.78157	0.00921039	0.078383
PHLPP2	0.561011	3.79304	6.78061	0.00921534	0.0783838
CARNMT1	0.496604	4.93228	6.77491	0.00924482	0.0785931
RPL11	-0.49012	8.81993	6.77224	0.00925866	0.078633
HOXA-AS2	0.882218	1.04693	6.77213	0.00925924	0.078633
FBXL18	-0.491985	5.04061	6.77034	0.00926854	0.0786616
ZNF362	-0.56739	3.68634	6.7696	0.00927237	0.0786616
ZUP1	0.589911	3.35087	6.76602	0.00929099	0.0787782
ANAPC11	-0.47986	6.33625	6.76386	0.00930224	0.0787919
ZDBF2	0.569696	3.64816	6.76313	0.00930603	0.0787919
CRABP2	-0.49098	7.68762	6.7629	0.00930725	0.0787919
APLF	1.27897	-0.445607	6.7609	0.00931766	0.0788387
SRRM3	-0.876051	1.05585	6.75964	0.00932423	0.078844
TMX3	0.482038	6.52579	6.75891	0.00932805	0.078844
KCNIP3	-0.582751	3.4435	6.75507	0.00934816	0.0789726
CKAP2	0.476168	5.96082	6.75018	0.00937384	0.0791481
BCKDK	-0.481486	6.51849	6.74597	0.00939599	0.0792787
ZNF280C	0.557262	3.82701	6.74481	0.00940208	0.0792787
NOTUM	-1.24705	-0.41336	6.74444	0.00940403	0.0792787
HS6ST1	-0.492711	4.99668	6.74213	0.0094162	0.0793399
PCMTD1	0.555685	3.85291	6.74095	0.00942243	0.0793509
TPI1P1	-0.578884	3.4895	6.73952	0.00943001	0.0793585
PTPN18	-0.536189	4.18379	6.73851	0.00943534	0.0793585
UXT	-0.501245	4.79758	6.73789	0.00943863	0.0793585
MIR1254-1	1.06822	0.219713	6.73706	0.00944299	0.0793585
RILPL2	-0.597616	3.22546	6.73328	0.00946302	0.0794854
FUT8-AS1	1.52328	-1.068	6.72715	0.00949563	0.0797097
EARS2	-0.475378	5.96048	6.7264	0.00949959	0.0797097
PIEZO1	-0.48939	7.74111	6.72049	0.00953115	0.0798761
AC073050.1	-1.23486	-0.377816	6.72016	0.00953288	0.0798761
RNF144A	-0.479296	5.40084	6.71945	0.00953673	0.0798761
KDM2B	-0.474999	5.9342	6.71898	0.00953921	0.0798761
HIF1A-AS2	1.26021	-0.393182	6.71575	0.00955649	0.0799792
LLGL2	-0.474302	5.74928	6.71403	0.00956574	0.0800152
TRPM7	0.478535	5.41729	6.71064	0.00958393	0.0801258
RPS19	-0.486923	9.1242	6.69536	0.00966644	0.0807738
RPL35A	-0.48725	8.74342	6.69075	0.00969146	0.080941
THOC6	-0.475601	5.51194	6.68897	0.00970111	0.0809797
SCRT1	1.08114	0.157766	6.68705	0.0097116	0.0810253
ARL14	0.707526	2.09785	6.68159	0.00974134	0.0812315
CEP128	0.54189	4.03863	6.67059	0.00980169	0.0816895
FLVCR2	-0.581287	3.4085	6.66973	0.00980638	0.0816895
GUCY1B2	0.98775	0.52656	6.66631	0.00982524	0.0818044
RPS23P8	-0.860878	1.09601	6.66235	0.0098471	0.0819441
MSS51	0.914242	0.866489	6.66054	0.0098571	0.0819851
HOXA6	1.41632	-0.865448	6.65008	0.00991512	0.0824252
ZNF438	0.767204	1.68766	6.64384	0.0099499	0.0826718
PLXNB1	-0.501565	4.71464	6.64218	0.00995921	0.0826828
RPL32P3	0.64832	2.59978	6.64177	0.00996147	0.0826828
PCGF5	0.867725	1.08364	6.64	0.00997141	0.0827227
NECTIN1	-0.481788	6.99546	6.63827	0.00998111	0.0827606
TLCD1	-0.712402	2.03958	6.63685	0.00998901	0.0827837
CRAT	-0.476617	5.38866	6.6354	0.00999715	0.0828086
CTSF	-1.18772	-0.228225	6.6341	0.0100045	0.0828268
REX1BD	-0.472033	6.03272	6.62799	0.0100389	0.0830125
ZNF121	0.473689	6.22547	6.62673	0.010046	0.0830125
NDST1	-0.48311	7.20421	6.62581	0.0100512	0.0830125
NR2C2	0.473294	6.19189	6.62578	0.0100513	0.0830125
AC114811.2	1.30364	-0.58026	6.62555	0.0100526	0.0830125
INPP4B	0.648405	2.5992	6.62447	0.0100587	0.0830203
MTBP	0.538566	4.05541	6.62083	0.0100793	0.0830836
CD63	-0.484377	8.96691	6.62038	0.0100818	0.0830836
AL391095.3	1.47466	-0.99737	6.62027	0.0100824	0.0830836
NAPB	0.565236	3.61692	6.61931	0.0100879	0.0830836
AP003774.4	-0.89856	0.901613	6.61857	0.0100921	0.0830836
GIT1	-0.471766	6.08838	6.61353	0.0101207	0.0832763
MYH3	0.886099	0.975093	6.61096	0.0101353	0.0833062
MCM8	0.472216	6.15011	6.61038	0.0101386	0.0833062
RAPGEF6	0.602922	3.09261	6.61007	0.0101404	0.0833062
AOC2	0.81958	1.31875	6.60875	0.0101479	0.0833062
AL359715.2	1.36199	-0.747214	6.60836	0.0101501	0.0833062
ATG2B	0.472988	5.4995	6.60743	0.0101554	0.0833073
CLIC2	0.750738	1.77559	6.60494	0.0101696	0.0833816
CACNA2D4	1.06541	0.194174	6.60333	0.0101788	0.0834145
SUGT1	0.470371	5.82309	6.59828	0.0102077	0.0836091
MIR6835	1.38399	-0.807721	6.59143	0.0102471	0.0838854
AC090181.3	1.05083	0.235532	6.5906	0.0102519	0.0838854
IMPDH2	-0.484023	8.24154	6.58834	0.0102649	0.0839495
TMEM161B	0.48798	4.96629	6.58542	0.0102818	0.0840449
ABL2	0.492563	4.86975	6.58243	0.010299	0.0841113
AC009318.1	0.965555	0.591234	6.58221	0.0103003	0.0841113
NDUFA7	1.12981	-0.0280486	6.57826	0.0103232	0.0842554
HGH1	-0.483306	8.46046	6.5732	0.0103525	0.0843803
FAM207A	-0.469128	5.68092	6.57314	0.0103529	0.0843803
FAM69B	-0.535606	4.0714	6.57193	0.01036	0.0843803
ZBED1	-0.475963	5.3185	6.57141	0.010363	0.0843803
LINC02009	1.08755	0.10879	6.57113	0.0103646	0.0843803
SYDE1	-0.469578	5.94224	6.56632	0.0103927	0.0845236
ASMTL-AS1	0.961966	0.612347	6.56632	0.0103927	0.0845236
SLC35B3	0.571222	3.49333	6.56438	0.010404	0.084573
RECQL4	-0.481379	7.27679	6.56233	0.010416	0.0846282
MOB3B	-0.578966	3.37319	6.56127	0.0104222	0.0846358
TICAM1	-0.468665	5.70996	6.55834	0.0104394	0.0847257
ABHD17A	-0.475015	6.5479	6.55694	0.0104476	0.0847257
AC073585.1	0.816573	1.31555	6.5567	0.010449	0.0847257
DCBLD2	0.483263	7.73993	6.55393	0.0104653	0.0848149
AC087521.2	1.33463	-0.692272	6.55268	0.0104726	0.084832
FAM160A1	-0.687981	2.19472	6.55095	0.0104828	0.0848718
MAGEA12	-0.469808	6.13608	6.54979	0.0104897	0.0848848
TRIM38	0.514327	4.41643	6.54674	0.0105077	0.0849878
SNHG4	0.475481	5.28703	6.54293	0.0105302	0.0851272
AC116533.1	-0.474123	6.52604	6.54076	0.010543	0.0851574
[truncated: 14,146 more rows]

## Sheet: table2
significantly activated master regulator after ID2 overexpression
OLIG2
KLF2
CEBPD
CEBPE
SP140
RBPJL
CRX
DLX4
NR0B1
EMX1
EMX2
EN1
ESR1
ESR2
FOXE3
FOXJ1
NR5A1
GBX1
FOXD3
FOXB1
GSC2
RAX
VSX1
HMX1
TLX1
HOXA7
HOXB1
HOXB6
HOXB9
HOXC11
HOXD11
TBX10
IRF4
LHX1
PHOX2A
MEOX1
ASCL1
NEUROD1
NEUROD2
NHLH2
NEUROG3
PITX1
POU1F1
POU3F2
POU4F2
POU4F3
PKNOX2
SHOX
SIX3
SNAI2
SPI1
SRY
STAT4
TBX5
HNF1A
TCF15
TFAP2B
NKX2-1
VAV1
PAX8
SOX14
GCM1
LMO4
NR1I2
PHOX2B
HAND1
IL10
CSH2
INPP5B

## Sheet: table3
diffentially expressed genes in de novo NEPC
gene	pvalue	t
AATF	0.0472696625676405	-2.57157953814945
ABCD3	0.0428013841830883	-2.6612827484173
ABCF1	0.0121957588126446	-3.65477843300468
ABHD3	0.0137548839989583	-3.49806412807071
ABI2	0.00331588097921843	-4.4608501335058
ABLIM2	0.0194505353080574	-3.38483359206397
ACBD7	0.00501710103709516	-4.72340506067144
ACOT11	0.0294211032541977	-2.72003320103572
ACSF2	0.0386692319875435	-2.76690486968705
ACSF3	0.0216174421861304	-3.1462063529827
ACTN4	0.049217009580926	-2.48842415919906
ACYP1	0.0475771456996559	-2.60220275529216
ADAM22	0.00782370982680075	-4.05059972243712
ADAMTSL2	0.0435928288223291	-2.58963346739929
ADAT3	0.0344668693505471	-2.78692308496688
ADCY1	0.0333818334439404	-2.88106146499172
ADCY9	0.0280918027107108	-2.98643781537447
ADCYAP1	0.0292753395865443	-3.02384052744886
ADGRB3	0.0436906703092727	-2.6785507848465
ADGRV1	0.0252553188201475	-3.08683863949468
ADRA1B	0.0208534448121141	-3.16668315136234
AFAP1	0.0269831031577625	-2.74196747020953
AGBL4	0.0312713710331446	-2.93826560749362
AGO1	0.0345195011412177	-2.81933569965041
AGO3	0.0437266448686003	-2.6187947267813
AGPAT1	0.0190225780814824	-3.31110539786554
AGPAT4	0.0376719996655217	-2.76088230247006
AGPAT5	0.0176793879211275	-3.27168193565914
AGPS	0.0229071917770461	-3.18678630865811
AHDC1	0.00912603572046013	-3.99936775737442
AK9	0.000562737339705472	-5.72471259257414
AKIRIN2	0.0448231760073743	-2.65168962993908
ALG6	0.033467908479285	-2.83425006761811
ALX3	0.0214526422330402	-3.10559701664191
ALYREF	0.00334248784067276	-3.09303993767875
ANKRD65	0.0340751103338972	-2.89199408119013
ANLN	0.00467468468661575	-4.39258176276838
ANO6	0.0384868902796451	-2.65032013709016
ANO8	0.0432988165872734	-2.5635911068644
ANO9	0.00291927354898291	-5.31047393546164
AP1M1	0.0203309026967346	-3.27243543572781
AP3B2	0.0144983169256259	-3.5905876460066
APBA3	0.00486912227634853	-3.86699453902757
APBB1	0.00658098292212982	-4.1161052309056
APBB2	0.000362519278938975	-6.46064132290755
APLP1	0.0316131787964148	-2.89403695408099
APP	0.0437688688911962	-2.60374759063319
ARHGAP5	0.0488243273557996	-2.56621174741586
ARHGAP22	0.0109411136201003	-3.87420892451058
ARHGAP33	0.022969419715676	-3.21911992698112
ARHGEF19	0.00402374924599516	-4.94004738921066
ARHGEF39	0.00308368994499113	-5.16291205852165
ARL4C	0.00574330377265522	-4.37055222329918
ARL5B	0.0392548505152833	-2.54221857001373
ARL6IP6	0.0015287663302717	-5.76027575890861
ARMC3	0.0440629713000711	-2.66178970125835
ASB1	0.0306805122859337	-2.96355611617535
ASB16	0.0424192868757778	-2.58021457869152
ASCL1	0.0457535576354416	-2.64397866614968
ASF1B	0.0111885837889408	-3.90187226145926
ASPHD2	0.00391942989541987	-4.528712806995
ASPM	0.0092591305846092	-4.04091771133172
ASXL2	0.0232997259121872	-3.02077319678334
ATAD2	0.0141175490346711	-3.57501682320812
ATAD5	0.00577649588108945	-4.33935414020103
ATF2	0.0439056221603247	-2.60978938999394
ATL1	0.0394451937935667	-2.73349092323867
ATP1B1	0.043137419878144	-2.65871384286222
ATP4B	0.0209047813319055	-3.26486483059475
ATP5SL	0.0449335933921051	-2.64781850710812
ATP6V0A2	0.0247875517594916	-2.8216142575614
ATP6V1G2	0.00140503486160102	-5.9085718567589
ATP13A3	0.0100818778013077	-3.67871910766777
ATXN7L2	0.00414925769465069	-4.68956907016315
AUNIP	0.0131064748185878	-3.62629618066351
AURKA	0.0151587987768926	-3.57315147007721
AURKB	0.01039919192042	-3.87307922192122
AUTS2	0.0420076043465647	-2.6439912919462
B3GNT2	0.00421053870271203	-4.61258074522408
B3GNT7	0.0344348603271797	-2.88032226885971
B3GNT8	0.0132277417671349	-3.74333307391105
B9D2	0.0209700244730047	-3.30754564735974
BACE1	0.027138619712281	-2.87852373934286
BAX	0.0473465066871522	-2.54751651358912
BBS9	0.0218352568223942	-3.03455343146135
BCAS3	0.00123810777221304	-5.01027944605787
BCL2	0.0371418752104451	-2.81325270210992
BCL2L11	0.0107108298970536	-3.65490250849192
BCR	0.0292950436658393	-3.00576541743459
BEST3	0.0194557812777269	-3.35907042295424
BICDL1	0.0180426459396978	-3.26790457298198
BIRC5	0.00659117258257724	-3.40273600914774
BLM	0.0147255517544113	-3.62272570973315
BLMH	0.0215057360305135	-3.22070221456222
BRCA1	0.0023184099910821	-5.33910682080709
BRINP1	0.0497619830700236	-2.50877113451673
BRIP1	0.0497952986611446	-2.55995523856892
BRPF3	0.0161427545944351	-3.3197977557806
BRSK1	0.0392666484023254	-2.71124880163419
BSN	0.0130279837732868	-3.73063244646811
BSPRY	0.0298784586476337	-3.00159996328147
BTBD3	0.0213460599733038	-3.29379251504404
BTG3	0.0132987733666497	-3.64342358622631
BUB1	0.00588698906181281	-4.4814323165569
BUB3	0.00785988082874585	-4.06119027741064
BUD13	0.0258454821541948	-3.07485467296827
C1orf112	0.0117305388438525	-3.74639854844767
C1orf127	0.0322063389739393	-2.94001446680474
C1QL3	0.00372102826628073	-3.83486486615398
C2CD3	0.000677363884714806	-6.69550231125478
C2orf70	0.0338674473993127	-2.87567187718539
C3orf67	0.0205978049601202	-3.27704422583428
C4orf46	0.0363987417220275	-2.7147906111195
C4orf48	0.0491137463697836	-2.47537815988302
C6orf136	0.0404835871752091	-2.54270930702983
C9orf3	0.0153722130332195	-3.51208288859114
CSTPP1	0.00461442808165604	-4.64640420305804
C14orf93	0.00145592161588777	-5.72440634910373
C14orf132	0.0480170848445394	-2.59751620745969
C15orf41	0.0399517600809015	-2.69327713822288
C16orf59	0.0233142833878067	-3.1751698661263
C17orf53	0.00271775833761273	-4.94785152396431
C18orf54	0.00408810348143406	-4.83120723087451
C19orf44	0.000151161994677585	-7.07154310339669
C19orf47	0.033344244949437	-2.89373322092442
C19orf54	0.0230958008490738	-3.16421885295528
C19orf57	0.0131847259986011	-3.69771970759891
C19orf68	0.0437943064430042	-2.67234497301432
C20orf196	0.0179854631998173	-3.19400767459333
C21orf58	0.00253957453373977	-4.7762314346413
C21orf62	0.0481618510604258	-2.14019159397628
CACHD1	0.00953568965151143	-4.05133957806817
CACNG5	0.0317888078939988	-2.93953512994482
CAD	0.0143615306278795	-3.6156001171375
CALML3	0.0389795898163164	-2.77290049257486
CARHSP1	0.0253219738693628	-3.11622484026452
CARMIL1	0.010366016402231	-3.84122995060492
CARMIL3	0.0405036161589152	-2.73254247037022
CASC3	0.0458637172271591	-2.40981603128857
CASP2	0.0354411555224477	-2.75481724272688
CASP8AP2	0.00967452197756576	-3.92588592834547
CBL	0.0115985961411162	-3.7076471819611
CBX5	0.0169339570424729	-3.40067695727921
CC2D1A	0.023000312689216	-3.16075356649385
CCDC18	0.0114000424448244	-3.55918022387704
CCDC24	0.023053059755687	-3.14882153411557
CCDC34	0.0395873876691719	-2.72572008057878
CCDC88A	0.0134946084818131	-3.62535465366311
CCDC97	0.00595289969427227	-4.29507970500985
CCDC114	0.0467615881740899	-2.52749890817008
CCDC150	0.00384898252667403	-4.64636524464336
CFAP210	0.000893780415378728	-5.33881810912663
CCHCR1	0.0197787639366024	-3.15225966225293
CCNA2	0.00791391311562937	-3.76673376349274
CCNB1	0.00720511462928547	-4.02315576891227
CCNE2	0.0193364892837458	-3.37648366876666
CCNF	0.018550766790802	-3.39344504747139
CCNJ	0.0207474459350944	-3.25181673756939
CCP110	0.0332385882933144	-2.88335724107318
CDC5L	0.0313628266524638	-2.80597520167604
CDC6	0.0193831556692258	-3.34409546900856
CDC7	0.0119052056779975	-3.83192601473935
CDC20	0.0229088458737725	-3.21384271333006
CDC25A	0.00316441102307434	-4.23385853905773
CDC25B	0.000456263898177251	-7.7942693544813
CDC25C	0.0206663161414494	-3.24236385884753
CDC45	0.0205266625625932	-3.30682119010476
CDCA2	0.0118690325625583	-3.79668666075339
CDCA3	0.034828991968797	-2.78754218769545
CDCA4	0.0416201088180221	-2.70195563604514
CDCA5	0.00070038758304192	-6.42402154701487
CDCA7	0.0449439669528261	-2.63969581462172
CDCA7L	0.0490242725174558	-2.55874195266571
CDCA8	0.00685223220176839	-4.38477029786831
CDH2	0.0272491517008547	-3.07717316932842
CDK2	0.0034024771594548	-4.99338882333433
CDK5R1	0.0132818685940048	-3.72989729984293
CDK5RAP2	0.0214454311072513	-3.26294197290385
CDK11B	0.0203523206189476	-3.19046234222902
CDK18	0.0439151433090835	-2.65458512276618
CDKAL1	0.0216310833373638	-3.28980189903261
CDKN2A	0.00732647371764245	-4.30793909464065
CDKN2C	0.0402533258809374	-2.74633303736992
CDKN3	0.0156418281522449	-3.4500588530698
CDS2	0.0412723817114408	-2.60943668474424
CDT1	0.0232709597195267	-3.19597971498525
CEACAM5	0.0219330349384297	-3.25071288121633
CEBPG	0.0111458846491856	-3.83934172913301
CELF3	0.0307101123286613	-2.97116357678917
CELF4	0.0443670331063256	-2.64777230206945
CELSR2	0.00210170749802866	-5.55702120278547
CELSR3	0.0393873353099105	-2.70076130534486
CENPA	0.00774195986243826	-4.23415503895133
CENPB	0.00735742325417196	-3.83164068035547
CENPE	0.00193513411916873	-5.04554081470502
CENPF	0.00485062795944126	-4.73222395875566
CENPI	0.0484263851738176	-2.57761425971219
CENPK	0.0355585682343018	-2.77047726152971
CENPO	0.00243018741160731	-5.37465531482283
CENPS	0.00466872572656702	-4.48374704312339
CENPV	0.0357204071155744	-2.65756363642522
CENPW	0.0247826232895769	-2.56320844350714
CEP41	0.00319855207931741	-4.52897601647833
CEP55	0.0136093659445083	-3.70355730562441
CEP68	0.0413817316854612	-2.66643071569697
CEP72	0.0132954185295588	-3.65684428661563
CEP76	0.000313657136824592	-6.49884347927312
CEP85	0.00264510594335973	-5.44641108689209
CEP85L	0.0339209360504617	-2.85929433012865
CEP89	0.0317818946507616	-2.86365866045786
CEP97	0.00309643489266432	-5.20065331806976
CEP131	0.00451715607576908	-4.49661310681069
CEP135	0.0158775462516165	-2.86670993445105
CEP170	0.000693335304517814	-4.29184150671015
CEP192	0.00646587621079533	-4.21923498106161
CEP250	0.0194200659870817	-3.35299174676306
CERK	0.0274523621741881	-3.04787273916367
CERS6	0.0302660011853803	-2.70305328928358
CHAF1A	0.00422338041263962	-4.61699891951277
CHD4	0.0207300600192908	-3.14779517864656
CHEK1	0.0089757068460075	-4.06647480526911
CHEK2	0.0313940412354562	-2.90248452394722
CHMP1B	0.0326802715005617	-2.78920882852058
CHN1	0.029173740994889	-2.70665271206845
CHN2	0.00728699897024774	-4.11294379371926
CHRAC1	0.00447829383537741	-4.43884877321758
CHRM4	0.0482288526152906	-2.59938613095702
CHRNA5	0.0288627515425521	-2.96271393850976
CHRNA9	0.0407587457788898	-2.72857254559077
CHRNB2	0.00946412355580243	-4.01799739914193
CHST1	0.0272890352526258	-3.08153076949074
CIART	0.021618007304002	-3.20682344845303
CIC	0.0487379023040892	-2.58388821859009
CIT	0.0146736505914691	-3.61678560305448
CKAP2L	0.00592899040836985	-4.55159470656357
CKAP5	0.00471774476016748	-4.46551013161763
CLIC4	0.00617294906681802	-4.22813169192435
CLSPN	0.00656993070422789	-4.45293487773537
CLTCL1	0.00811705010644453	-4.01347473206082
CNTD2	0.0490970494453124	-2.56230475878948
CNTF	0.0398564951940524	-2.65835986155454
CNTRL	0.00990854540631413	-3.95287622997427
COPG2	0.0173587134564105	-3.30275737859158
COPS7B	0.0129355673011432	-3.43939112631132
COQ10A	0.0109142243211481	-3.8328919736249
CORO1C	0.0144363511892503	-3.59754897588775
CORT	0.000164957756581384	-6.61624413386652
COTL1	0.00975575328117545	-4.04202107651389
CPD	0.0310317698222576	-2.90044184785175
CPSF1	0.0420888072853137	-2.68241808796865
CPSF3	0.00734138711119153	-4.07857419734175
CPT1C	0.0185783238863264	-3.42406199927053
CRIP2	0.0426124397829834	-2.63922876442391
CRKL	0.0292817595176446	-2.90586178917429
CSNK1G2	0.00172958722225697	-5.28000950407511
CTPS1	0.038759582569876	-2.75842734162147
CUEDC1	0.0129148928597241	-3.74027518730997
CXXC1	0.0292611721741404	-2.88887926291722
CXXC4	0.0445794372608476	-2.66118004044147
CYTH2	0.00128493315683578	-5.66619870080746
DAND5	0.00944143075198689	-3.79948344400744
DAXX	0.0155320223026328	-3.36238745527517
DBF4B	0.00927163829187785	-3.93092818597622
DBH	0.00501033594716068	-2.94240390426084
DBN1	0.0253088010338508	-2.87112235064837
DBNDD2	0.0137477348197644	-3.69771617371617
DCAF7	0.0024294222266275	-4.32649780338876
DCAF15	0.0131075362859539	-3.69815599577422
DCDC2	0.0079054631340893	-4.08813914383189
DCLK1	0.0340952106868557	-2.88330865333562
DCLRE1B	0.00866235509484143	-4.02421757817247
DDIAS	0.00413504928500041	-4.63486819210663
DDX46	0.0108492739623649	-3.66111873379888
DEK	0.0159635336655179	-3.51439087968941
DESI2	0.028875307825874	-2.99301781808979
DGCR8	0.0110743247344958	-3.84330224313135
DGKH	0.0289058722773806	-2.98156039507163
DGKZ	0.00759936649027536	-4.08573498206814
DHX8	0.0014174203561206	-5.47814574148012
DHX9	0.0227419689935476	-3.13384263671877
DIAPH3	0.0386258350019513	-2.68736620888873
DLGAP4	0.0248339584375924	-2.89375678061612
DLGAP5	0.0425138673730061	-2.69578387421219
DLX5	0.018201687818631	-3.42654602085695
DLX6	0.00590410668417486	-4.54887873402042
DMAP1	0.000909159624447133	-6.00587850896504
DMPK	0.0442539413813846	-2.62611793128362
DMWD	0.014568644016342	-3.55031480794538
DNA2	0.0254966322736192	-3.03881793468596
DNAJB5	0.00575252765107125	-4.21723440827596
DNAJC6	0.0194253476341869	-3.36313709698973
DNAJC22	0.0303641222373105	-2.88113025904972
DNALI1	0.0255686841308055	-3.08766536021586
DNM1	0.00745607444319011	-4.27685843889359
DNMT1	0.00139786990198493	-6.19331731862049
DNMT3A	0.00346296415829436	-4.65264154712374
DNMT3B	0.0455136265071311	-2.62114894803123
DOK6	0.029215018861565	-3.01957067684033
DPF1	0.0244939907837839	-3.17342241790282
DPY19L1	0.000160904928664658	-6.03116414851673
DPYSL2	0.0011042501612225	-5.85310333891345
DPYSL3	0.00456966291382928	-4.8184939233281
DRAXIN	0.0142604551735122	-3.66861615852808
DSCAML1	0.0401039591872121	-2.74295712639282
DSCC1	0.00457314537078279	-4.6884076141736
DSP	0.028260288064644	-3.01210082675088
DTL	0.00165955429682109	-5.739684779219
DUSP18	0.0488608360817191	-2.51512791459457
DYNLT1	0.0401695723633765	-2.66938984263307
DYRK1B	0.0384679817798968	-2.75946378781219
DYRK2	0.00343295083565989	-4.82660283041067
E2F1	0.0209817671813086	-3.31534321925014
E2F3	0.022772787732706	-3.21137900348552
E2F6	0.0252818255082927	-3.05400781614531
E2F7	0.00456516983150346	-4.78602401972273
E2F8	0.00535917000475625	-4.62682709331528
EFCAB7	0.00161567532202388	-5.03248274973893
EHMT2	0.0198325578112632	-3.17561121130676
EID2B	0.0338737035057018	-2.86651412591081
EIF1B	0.0327834467763575	-2.64732146414534
EIF4EBP2	0.0423296552228095	-2.33931435792018
EME1	0.000926177698070382	-5.66651798077837
EMSY	0.0190689292116401	-3.34701347527072
ENO2	0.00739877855763311	-4.19689636808806
ENTPD2	0.0218987891164813	-3.26598505459385
ENTPD3	0.0140558503437343	-3.34666692211422
EPHA7	0.0209230190798872	-3.27086382524088
EPHB2	0.0326451975830879	-2.91355177437505
EPM2A	0.0222220322429256	-3.15988971874083
ERAL1	0.00551893641596458	-3.64310379291847
ERFE	0.0298511271833539	-3.00571268830939
ESCO2	0.0396808869897636	-2.67982529539027
ESPL1	0.0121021251166446	-3.78956476418198
ESPN	0.0194480576282282	-3.3447196346862
ETNK2	0.00670710518656353	-4.20948577091676
ETV5	0.0407088821174705	-2.62798601315929
ETV6	0.0316642569181574	-2.92736726598575
EXO1	0.00298287184036702	-4.99332531095062
EXO5	0.0202299454999688	-3.31580107534135
EXOC2	0.0490064658556047	-2.54802735406154
EXPH5	0.0209573050474594	-3.02646980871751
EXT1	0.0136142399118477	-3.47206534355909
EYA2	0.0494196823620094	-2.55698634092113
EZH2	0.00172691367552972	-5.4728282163248
FA2H	0.0457069974090609	-2.61813776701705
FADS1	0.000821250822097446	-6.34885577085623
FAF1	0.0423823508541692	-2.6555119026941
FAM49B	0.0362695847625387	-2.68860224092314
FAM64A	0.0284091670725676	-3.02485253147047
FAM83D	0.0282339805950647	-3.04221778438635
FAM111B	0.0413458608851565	-2.69910261248798
FAM122B	0.0468942531242392	-2.46184900135301
FAM161A	0.0294576960097217	-2.99969336599774
FAM167A	0.0268563191166153	-3.09434084089117
FAM168A	0.0319684803785058	-2.69625848587036
FAM171A2	0.0113834823346899	-3.88199734228514
FAM184A	0.0313810336623656	-2.93737436171455
FAM212B	0.0405315264633505	-2.73365786237351
FAM221A	0.0305374743672541	-2.73034599521416
FAM222B	0.0224071816825873	-3.0423417436776
FANCA	0.0139236505720362	-3.64299003152367
FANCC	0.000158435528226846	-7.22916666579451
FANCD2	0.0189065291366087	-2.98544867133186
FANCE	0.00750651870325063	-4.22322972758626
FANCG	0.010465102756348	-3.68432759971363
FANCI	0.030459035202257	-2.95116129958155
FANCL	0.0157589232864468	-3.5314871859738
FAR1	0.038362297608993	-2.43828375034511
FAT3	0.0372176881543624	-2.81154156638701
FBXL6	0.0345685291276845	-2.72516622407049
FBXO5	0.00478935780942843	-4.76375148032298
FBXO30	0.0477121870018921	-2.54194304775715
FBXO43	0.0225833141184575	-3.218938329324
FEN1	0.00213770685589162	-5.53053928463773
FHAD1	0.0207642549312735	-3.2340834304703
FIG4	0.0491845259061199	-2.50259266025235
FIGNL1	0.028061676575796	-2.99339811419242
FIZ1	0.0242378259544446	-3.16219951629909
FKBPL	0.00927975943873853	-3.88894504831115
FMN2	0.0400809128108201	-2.7423517413761
FOXD3	0.00255017631718522	-5.36934800849565
FOXJ1	0.001259920699653	-6.03671239111959
FOXO6	0.0208108145752894	-3.32088709727456
FRAS1	0.023705582748493	-3.16670886390592
FRMD5	0.000853549741019522	-6.61607886146645
FRS3	0.0321914803072315	-2.68508036392242
FSD1L	0.0260400294244406	-3.07365420641334
FSTL4	0.0068891419100621	-4.34260525326627
FUS	0.017385876108836	-3.37659044307529
FUZ	0.00199850345211907	-5.62803602273167
FXYD6	0.0367868315295171	-2.8158823269475
FYN	0.00204259611122967	-5.58618649882408
FZD1	0.0266544263783172	-3.04635158839048
FZD3	0.0161682755655726	-3.17138391326766
FZR1	0.00735740060757845	-4.09426886978566
GAB2	0.043956904171403	-2.62523605284581
GAD1	0.0132015418483474	-3.35796697115007
GADD45A	0.0205495728923474	-3.32645322718614
GALNT10	0.0246772889125356	-3.13440907346975
GAPDHS	0.0355783751202252	-2.36560806074859
GAREM1	0.0333888609296578	-2.86661519320151
GAS2L3	0.00220316008748613	-5.46000158498296
GATAD2B	0.0019191187412127	-4.81119377514649
GBE1	0.0488128296767121	-2.55914971207011
GCH1	0.0376524163960285	-2.79557632528783
GDAP1	0.011277363271807	-3.84434974417471
GDAP2	0.0455349131705681	-2.49501081250026
GDPD5	0.0420875772489066	-2.51555516037841
GFI1	0.0471583487007866	-2.56945007753505
GGNBP2	0.0017170095996025	-5.19400127681651
GGT7	0.00582213988788366	-4.49190101548538
GINS1	0.00284645836047939	-5.01977191300321
GINS2	0.00534198508896268	-4.34689581051888
GIT1	0.0392799627428899	-2.64461431047789
GLRB	0.0403673894975308	-2.74286963639498
GNA11	0.00470722762262552	-4.2531660329238
GNAI3	0.024007622166889	-2.78902314295035
GNAO1	0.0130044094354236	-3.75785239827668
GNAZ	0.0154259089234926	-3.53531915564697
GNG4	0.00399624276417	-4.89136030610522
GOLGA6L7P	0.0210218274754276	-3.30595859547774
GPANK1	0.0190386383109848	-3.30047795158054
GPATCH8	0.00759181654570012	-3.94037870783514
GPC2	0.0498630230915623	-2.55937897253346
GPR39	0.0289989180480889	-3.00333442711346
GPR137C	0.00973082822824579	-4.01246383498129
GPR173	0.0247919043209464	-3.02963612904982
GPRIN1	0.00949440141689607	-4.07426712683049
GPSM2	0.0093942930019987	-4.00722483516275
GRAMD2	0.0421785346625841	-2.70364500186185
GRAMD4	0.000353774389997347	-4.88005596200245
GRB7	0.0198434021940661	-3.28677112994121
GRB14	0.0394052655695639	-2.48643177542884
GRIK3	0.0243824200347683	-3.18544638450247
GRP	0.0335387816502395	-2.90602674460872
GSG2	0.0205500063984195	-3.27611821794207
GTF2A1	0.00662351143183748	-3.86098959246259
GTF2H4	0.0396088314152438	-2.69889964721408
GTF3C4	0.0137077670019453	-3.5921514828213
GTF3C5	0.00403952416943955	-4.74999694366744
GTPBP2	0.0117357542407558	-3.70880033764282
GTSE1	0.0239127929939744	-2.82858050017033
H1FX	0.0062262811283284	-4.15170948658532
H2AFV	0.0262414050531461	-3.0790814562429
H2AFY	0.00244745396124492	-4.93134350584717
HACE1	0.00231355885222083	-4.88993737186149
HAUS5	0.0148823261003467	-3.59503854588306
HAUS8	0.015277958603682	-3.57819435142986
HBS1L	0.0416002965094167	-2.64613099256399
HCN3	0.0217046970855921	-3.21825540977029
HDAC2	0.00940255306906009	-3.96568900460424
HDAC5	0.0276714026021144	-2.94664283551796
HDAC6	0.0299476714911663	-2.93005950214338
HDX	0.0448463268073	-2.58863800211001
HELLS	0.000174475137939797	-8.28646524310637
HES6	0.00491264837597523	-4.77467550821042
HIPK1	0.00202945473204091	-4.77347077443318
HIST1H1B	0.000615143419027925	-4.90709095368021
HIST1H1E	0.00817732983674554	-3.66935960148212
HIST1H2AB	0.0400145541883141	-2.62143645954872
HIST1H2AE	0.00544452786429254	-4.12536541124109
HIST1H2AG	0.00867415699588284	-3.42999050789898
HIST1H2AI	0.0326911323846559	-2.87716548079037
HIST1H2AL	0.00946336909996202	-3.93214896375778
HIST1H2AM	0.0146237582515119	-3.54227236245363
HIST1H2BG	0.0395395418908794	-2.67110020209205
HIST1H2BJ	0.0155607010497979	-3.34813015639547
HIST1H2BL	0.0126279676832709	-3.59619114746284
HIST1H2BN	0.00167628675455423	-5.82572210215615
HIST1H2BO	0.00357032613650785	-5.02373794470575
HIST1H3H	0.015812778293564	-3.4762069545723
HIST1H3I	0.000188692680646621	-8.46402125266928
HIST2H2BF	0.0448569302658281	-2.59316485968029
HJURP	0.0227664939846263	-3.21872601307364
HMCN2	0.0332131074982917	-2.91360718507084
HMGB2	0.00240008879723846	-4.7810682256355
HMGB3	0.0313800843032332	-2.95180968806853
HMGN3	0.0265944905124085	-3.08490468288001
HNRNPH3	0.00227478395931185	-4.73157134742131
HNRNPM	0.0426262321046635	-2.60452912538821
HNRNPUL1	0.035697028840025	-2.83613852572578
HOOK1	0.043579268451314	-2.62586190425926
HOXA9	0.00365546597405665	-3.59199152101145
HOXB3	0.0372229525639958	-2.8135435215204
HOXD8	0.0445141540814325	-2.58117842968827
HPSE	0.0494023847857959	-2.56735569441314
HS2ST1	0.00855838755640597	-3.83995648181048
HSDL1	0.0343048346799042	-2.73184641973387
HSF2	0.00595350869681055	-4.28712590788968
HSPA4L	0.0299952021435394	-2.85099146552719
HUNK	0.0495340200178909	-2.56935036959514
ICMT	0.0251465485906955	-3.10743502926955
ID4	0.0289379281253676	-2.90101884764768
IER5	0.00468624342754153	-4.69056529808736
IFI27L1	0.0104676392174824	-3.59083559985418
IFT81	0.0351423643640793	-2.76870323057992
IGFBP2	0.035511416204094	-2.75494722905987
IGFBPL1	0.0294625794995674	-3.01554411451646
IGSF9	0.0460224101444324	-2.62562285529028
IGSF21	0.0175935002952573	-3.42175497792545
IKZF4	0.0386994840669705	-2.69722717296048
IL22RA1	0.00518297500232332	-4.1366063401798
ILF3	0.000296786145919653	-6.21247200187336
ILKAP	0.0438379517615557	-2.57501805221222
INA	0.0410226805066646	-2.73122560246485
INCENP	0.00351059065823329	-5.02369448515151
INPP5E	0.0431940744614103	-2.61289456094884
INTS4	0.00774599786465536	-3.47914433441037
INTS7	0.00337827926234877	-4.78745782848576
IPMK	0.0203935598615606	-3.22577013646639
IPO7	0.0364320765798036	-2.65515615784208
IPO9	0.000759288861088995	-6.46561862803903
IQCC	0.0215922596673272	-3.13822396681975
IQGAP3	0.00956815463076472	-3.95068542576218
IRAK1BP1	0.000441403613467854	-6.43094315451818
IRF3	0.0469135438949301	-2.54383495601444
ITGA3	0.025809853091247	-3.05857530520852
ITGB3BP	0.0071879491952235	-3.97273056282121
ITM2C	0.0284119645577123	-2.94390546934081
ITPR3	0.00884776442962251	-3.58449109846035
IVNS1ABP	0.00102562317780352	-6.07411310519226
JAM3	0.0200198830517032	-3.28514051828846
KANSL3	0.0163947105343678	-3.21530309399626
KAT7	0.00266836765208137	-4.36628458103356
KATNA1	0.0125852839802118	-3.69911807746258
KATNAL1	0.0102211084808591	-3.85518374283576
KBTBD2	0.00983963665129738	-3.75186354871714
KCNAB2	0.0003784480727608	-5.65025874314931
KCNC1	0.0345940182476012	-2.87717366224942
KCNH3	0.0304115298217769	-2.977574936539
KCNH7	0.0161968524559039	-3.54985936953894
KCNH8	0.0215414293212446	-3.27262793883547
KCNIP4	0.0411529438379502	-2.46186045663009
KCNK5	0.0417035581175538	-2.71792961572912
KCTD6	0.0416758630787275	-2.71275380650239
KDM1A	0.00827504056806077	-4.07404246701033
KDM1B	0.00186332472911251	-5.34876443288571
KDM2B	0.00421468814949282	-4.47286992226628
KHDC1	0.00655032945680093	-4.26831286261248
KHDRBS1	0.0210432023273112	-3.28745463560228
KIAA0355	0.0383304552307939	-2.74195440618124
KIAA1161	0.0367996147172868	-2.74139590040544
KIAA1211	0.0297499567105646	-2.93377209567858
KIAA1211L	0.00771769041592476	-4.26562368388606
KIAA1524	0.0447972326263636	-2.5579719621131
KIAA1958	0.0138121715280938	-3.39495824618852
KIAA2013	0.0434204214710021	-2.58250049596315
KIF1A	0.0341081872634362	-2.87643885816296
KIF2A	0.0389818947255624	-2.75321067162156
KIF2C	0.00394119126510584	-4.94898495544769
KIF3C	0.0184380944600575	-3.18171700989693
KIF11	0.0108190020884519	-3.84105714370854
KIF14	0.00576066223520053	-4.52596551779879
KIF15	0.00411219057884785	-4.73807777412237
KIF18A	0.00428475962315148	-4.82095784294339
KIF18B	0.00368331551284546	-4.98047787731154
KIF20A	0.0098562533552679	-3.93979074015695
KIF24	0.0108492756012425	-3.86726373852808
KIFC1	0.00231656768142008	-5.55485356707763
KIFC3	0.0487269016802978	-2.5835703575281
KIT	0.0141891064148959	-3.678602032517
KITLG	0.0244096203938255	-3.06279846651847
KLC1	0.0177819841786253	-3.3662364043243
KLF10	0.0109938590437006	-3.83320510191571
KLF11	0.0205280797598892	-3.2957917458814
KLF13	0.035116250554906	-2.84373964308568
KLHL2	0.00226378374351562	-5.44430137230158
KLHL11	0.0411282869221552	-2.40285767500756
KLHL15	0.0122596980906948	-3.66249033204853
KLHL23	0.0491632123391341	-2.49323172771949
KLHL24	0.0467814433307784	-2.57765419262974
KLHL32	0.0451125289293604	-2.63045396033918
KMT5C	0.0205376915058647	-3.29745968935646
KNTC1	0.00215674411208822	-5.31575317205806
KPNA2	0.00111248353060777	-6.28105771798318
KPNB1	0.00619185751719746	-3.97264396063066
KRTAP4-1	0.0297129726945873	-2.99474019397528
KSR1	0.033148897076174	-2.868933743517
L3MBTL4	0.0362712199490601	-2.83584981750252
LAPTM4B	0.0097589352197079	-4.01723337714037
LBX2	0.0305405420937716	-2.89963995335375
LCA5	0.000257556753226171	-8.16799112936486
LCORL	0.0276549130343898	-2.95986047915216
LIG1	0.0105924219106185	-3.9296771851885
LIN9	0.0362189189885436	-2.71321840416058
LMNB1	0.00293772199155513	-5.28707953283471
LMNB2	0.0295381702090426	-2.96706596968543
LMO3	0.0210344988837579	-3.31752030686725
LONRF3	0.0294278042160436	-2.94491633946775
LPIN1	0.0285423033427211	-3.03826568134451
LRRC8B	0.0397348026501454	-2.73705327486987
LRRC8D	0.00137138232078514	-6.04073952861002
LRRC10B	0.00888028682218395	-4.00770925764899
LRRC34	0.0163560733138534	-3.3309086296611
LRRC61	0.00871260204984803	-4.05277403663532
LRRCC1	0.0120233357384056	-3.8031685863883
LSM7	0.0454910184871029	-2.51407189921823
LSM14A	0.00115050016749052	-5.82874767923377
LSM14B	0.0283420051175637	-3.0175579407868
LY6G5B	0.0370547741571404	-2.44400784564039
LYG1	0.0104644020082675	-3.79942750531359
LYPD1	0.0218922825962026	-3.28157156601145
MACF1	0.0301574555470799	-2.87128893853269
MAD2L1BP	0.00264824897838448	-4.42425127872156
MAD2L2	0.0142964188291262	-3.66093234524231
MAGOH	0.0189072283599454	-3.20411075765904
MAK	0.0227644825261562	-3.07448570752695
MAN1A2	0.0447079350193736	-2.58730061979972
MAP2K7	0.0118893976044852	-3.53641856927038
MAP3K9	0.00378982179743718	-4.74060490370021
MAPK1IP1L	0.0339572405415879	-2.82630059743799
MAPK8	0.029313169721278	-2.95773029457416
MAPK13	0.00245199654323646	-5.25325782786431
MAPRE2	0.00582316681498911	-4.48654751207796
MARK1	0.0133067791472218	-3.72517948327514
MAST1	0.013534642142681	-3.69360366934348
MAST2	0.0396440318463614	-2.69366427552873
MASTL	0.0134121788122748	-3.40793145518989
MBD3	0.00731817251169321	-4.03681675123266
MBIP	0.0478015526087047	-2.60671341151759
MCM2	0.00142639917862538	-6.08720058042157
MCM3	0.00182392479336042	-5.76725761002526
MCM4	0.00224946584672663	-5.6043023809807
MCM6	0.0230338217638775	-3.21903593007735
MCM8	0.0377749451678922	-2.7896954464222
MCM9	0.00414909084117539	-4.60347270224955
MCMBP	0.025070441134731	-3.02959857431878
MCOLN3	0.0153972904853594	-3.60080680517254
MDC1	0.00157697722249402	-5.86602612553777
MED1	0.00478781819580232	-4.46726621052237
MED24	0.011602052868765	-3.73475360149578
MED30	0.0191806030229082	-3.28254329877002
MELK	0.0114781953061389	-3.85422780747047
METTL4	0.0429821540693192	-2.65765741238469
METTL21A	0.0262288845783447	-3.0756456175819
MEX3A	0.0191593144213927	-3.27287752450249
MEX3B	0.0233993808568043	-3.20980589059612
MEX3C	0.0254201749118663	-3.07371480458742
MEX3D	0.0207522387327829	-3.19261169447496
MFSD6	0.0208679269178732	-3.18452548200788
MFSD9	0.0135413372138162	-3.67103506360486
MFSD13A	0.0174737398594573	-3.46794947786346
MGAT5B	0.0220344565582959	-3.26557558156069
MICAL1	0.0450017951609048	-2.5619547248495
MKI67	0.000617320287672631	-7.05877729414976
MLF1	0.0188004786414293	-3.27739126778416
MLLT6	0.0444695959641539	-2.62181403887056
MMS22L	0.0189176465269417	-3.26784031513433
MND1	0.0154198050630439	-3.14575243584473
MNS1	0.00393263598589603	-4.60933089148284
MPHOSPH9	0.021837374444486	-2.93777619159726
MPP2	0.0130830737126547	-3.68440271279569
MSH2	0.00504779369902259	-4.67915327635575
MSH6	0.0221620574571547	-3.2359309995838
MSI2	0.000174706693187668	-8.19981822371452
MST1R	0.0322215207968008	-2.85041112384816
MTBP	0.0207030654456294	-3.28461049427321
MTF1	0.0349543650618517	-2.79168309814406
MTF2	0.00436960380626658	-4.65338315535143
MTFR2	0.0206234778342321	-3.26327971778643
MTHFD1	0.0490913550669404	-2.57426307831617
MTNR1B	0.0331740576605685	-2.86818674646686
MTURN	0.00558505792616589	-4.35412381272575
MURC	0.0188467953112531	-3.15693641804655
MUTYH	0.00115653721427665	-6.06704760262518
MVB12A	0.0253775012798782	-2.97122788897641
MXD3	0.0495984286589157	-2.4826023252413
MYB	0.0441459674905279	-2.65723515166758
MYBL1	0.000992624296753189	-6.7325303991351
MYBL2	0.00462920841646302	-4.69875753173924
MYEF2	0.0456842488300258	-2.43430236729056
MYH14	0.0114028827039012	-3.79695521748701
MYL6B	0.0021422188805947	-5.20783440099389
NAA40	0.00352723365638817	-4.96392600679064
NAB1	0.0205983341491356	-3.28730763591288
NARF	0.0381997257550702	-2.75333944138647
NASP	0.00188671473937586	-5.74304900223427
NAT8L	0.00492008022213219	-4.28628680000196
NAT14	0.0267962087731321	-3.0715694026066
NAV2	0.0241933724645455	-3.19012898840763
NCAM1	0.0325796613152156	-2.92952063771395
NCAPG	0.00337164679564557	-5.01461211397849
NCAPG2	0.03709532016856	-2.76516655274002
NCAPH	0.0089516713386165	-4.05912052821188
NCBP1	0.0134104725561176	-3.48845290222355
NCK2	0.0216679891651077	-3.26395741382994
NCOA5	0.0396591045523039	-2.64493973296324
NDC1	0.0139802878588394	-3.4679068697337
NDOR1	0.0260817302044932	-3.02345040981115
NEDD1	0.000210929188141841	-6.95920060475743
NEK2	0.0140991166404689	-3.63683456135887
NELL1	0.0396237700226151	-2.76391767343839
NEMP1	0.0444306308317869	-2.61775813862399
NEMP2	0.000564950983631322	-6.13796428116682
NEURL1B	0.0290047809500252	-3.02039651465227
NF1	0.0328209570054555	-2.81541414191483
NFATC2	0.0484268713432098	-2.52895550144332
NFATC3	0.0403329913997199	-2.65713545935206
NFE2L2	0.015299836439309	-3.39871284335505
NHS	0.0116481213558473	-3.87394750076727
NID1	0.0286715442745219	-2.91367426091537
NINL	0.00671627158996169	-4.07700258087423
NKAIN2	0.0274144545087177	-3.07992860416734
NKIRAS2	0.0323103630166779	-2.83272484905114
NKX2-1	0.00535202236174296	-4.69647186659791
NLK	0.00879530171221686	-3.83658178486799
NMT1	0.00410488378292008	-3.64297312335705
NNT	0.0426461143861493	-2.69737866827826
NOD1	0.0231129592253932	-3.11443146471805
NOP56	0.0141411311940798	-3.25704234997736
NOVA1	0.0322265823531358	-2.92611285890077
NPHP4	0.00424822643590881	-4.66746508748782
NPTX1	0.0253775704198457	-3.14876147049398
NR1D2	0.00118209843934769	-5.2377386229877
NR2C2	0.0410092974218762	-2.6144996164344
NR2F1	0.0221116575660476	-3.01967039329315
NR6A1	0.000228495100862584	-7.87623449978292
NRAS	0.00659929584589627	-3.73346588973337
NRCAM	0.0294550451103074	-3.0093639814371
NRM	0.00343273296091259	-5.1475371621785
NRSN2	0.0447558144638711	-2.4918608510826
NRXN1	0.0413897617518498	-2.71518935573161
NRXN3	0.0172633150734542	-3.49291761273235
NSD2	0.00148771244882142	-6.07661764925973
NT5C	0.045761206711392	-2.43450948411193
NTN1	0.0187458636734126	-3.35738961867969
NUAK1	0.0272793651440606	-3.07208951320909
NUAK2	0.0355995584665368	-2.819858760944
NUDC	0.00691495126314779	-4.08462813298551
NUDT3	0.00046801975877237	-6.10018132016683
NUF2	0.0106806067636863	-3.85018217088911
NUP35	0.0451272249194425	-2.38728788719219
NUP43	0.0429892180486584	-2.58491501198609
NUP62	0.0128127932675831	-3.67567161614542
NUP62CL	0.00302922192535742	-5.11265226200221
NUP85	0.005821398303166	-4.27066446507673
NUP107	0.046863190078762	-2.5255641360995
NUP214	0.0112466882248871	-3.71527355889997
OPRD1	0.0431356328728558	-2.69101234501622
ORAI1	0.0373726852572521	-2.74651921164366
ORC1	0.00501913005481783	-4.66544793150877
ORC3	0.0260147310552709	-2.90483411363795
OSBPL3	0.015574336468994	-3.56716251351431
OVOL3	0.0108496527023567	-3.60659163204488
PABPC1L	0.0244030110354119	-3.1263176582725
PACRGL	0.00461877796087206	-4.19069858882876
PACS2	0.0295755412354018	-2.97249176843498
PAFAH1B3	0.0117169865820465	-3.83096466374099
PAM	0.0121765227877459	-3.81592074597322
PAN2	0.0492827810786553	-2.5100509667899
PANK1	0.0108081516344255	-3.65665986369669
PANX1	0.0173577576556929	-3.43200055501465
PAPD7	0.00813937858814828	-4.16784489949079
PAQR8	0.0198423498586461	-3.28693269939667
PARP1	0.0125882465535767	-3.64680110124164
PARPBP	0.0317082776084596	-2.84835335553482
PASK	0.00177647840290552	-4.57908795366918
PATL1	0.00108920918361422	-5.76831368132292
PBK	0.0225217052276896	-3.10439797825041
PBRM1	0.0343369984600254	-2.63817693758944
PCDHB1	0.0461885434944645	-2.57431877900765
PCIF1	0.00463459023133846	-4.62142143290631
PCNA	0.00791210918605684	-4.1925304579566
PCNT	0.00775058613498836	-4.07734351965096
PCNX2	0.037957363332713	-2.75357327884478
PCP4	0.0470555111405747	-2.58728167392798
PCSK1	0.0388628855867662	-2.77985699853946
PCSK2	0.043992125856173	-2.6618328614751
PCYT1B	0.0433368062756546	-2.67623333824014
PDIK1L	0.035975109632508	-2.80649184927566
PEG10	0.0195248356680795	-3.38541121738343
PELI1	0.0211489464125537	-3.19944197197609
PELI2	0.0132624583859377	-3.71865093594784
PEPD	0.0131894956952507	-3.6126349302365
PGAP1	0.0021147567939823	-5.74586501286855
PGBD5	0.00267719899455952	-5.4383091135579
PGD	0.00746832977959727	-4.13460118857064
PGM2L1	0.0277122769856071	-3.00026671101999
PHACTR4	0.000189855153269094	-7.55622176099623
PHC2	0.0437342658483051	-2.67353333154871
PHF13	0.00103441986654193	-6.0828554271716
PHF14	0.0272715403659843	-2.52490156451731
PHF19	0.00245869456445841	-5.54934164892962
PHLDB1	0.0401128457092099	-2.70366525029842
PHTF1	0.02609371060623	-3.03004918910926
PHYHIPL	0.000550248494957532	-7.53627105501173
PI4K2B	0.00541830976653977	-4.19762272978177
PIDD1	0.0470729196571964	-2.56315711686057
PIF1	0.0114185839735914	-3.38603215294394
PIGT	0.0194482110138881	-3.28994554970473
PIGW	0.0470336990246828	-2.55296402361359
PIP4K2B	0.0433594050107913	-2.54197722110082
PKN1	0.026971899923767	-2.99813901622665
PKNOX1	0.00772712032634375	-4.07391050818711
PLA2G3	0.0338437294112886	-2.88100148466255
PLA2G12B	0.0207575666074928	-3.09921710891512
PLCXD2	0.0342685258869748	-2.82854595046609
PLEKHA1	0.0130381934276026	-3.70692893239611
PLEKHG2	0.00351517096636626	-4.94901799322582
PLEKHG3	0.0145427841766646	-3.6036336939073
PLEKHG4B	0.0363632398887013	-2.82518730580146
PLEKHG5	0.00261478112399302	-5.44978687381034
PLK1	0.00682119706499438	-4.32448081873631
PLK4	0.00151390716058131	-5.57130890324104
PLP2	0.00422588358031017	-4.77150240339715
PLPP2	0.0421496154780545	-2.69482792830979
PLS1	0.00904021322524714	-4.02258301557391
PMAIP1	0.00486760040170655	-4.18532455937456
POC1A	0.0285661523876872	-2.99896833212864
POGK	0.00384443427719309	-4.51887275415528
POLA2	0.00344625290452583	-4.93776903870761
POLD1	0.0361309155995062	-2.83446752747174
POLD3	0.00038804264343463	-7.15470457761945
POLR3C	0.00209127951720273	-4.56060007344937
POLRMT	0.00775495218531753	-3.56692122611931
POU2F1	0.000151565612530857	-6.87244171841461
PPARGC1A	0.0326868997242007	-2.77071972151743
PPM1D	0.00141170827366103	-5.86775386872454
PPM1E	0.0311529033997804	-2.85379657173874
PPM1L	0.0482683556896102	-2.58746073847831
PPP1R8	0.0323725003806827	-2.86064746369537
PPP1R37	0.00305404246301138	-4.76674735047772
PPP5C	0.0342129075244831	-2.85605106037156
PRC1	0.0246154560705774	-3.13315635683274
PRDM15	0.0359715545201436	-2.79959835213747
PRELID2	0.0306426704796266	-2.89456287450454
PRIM1	0.0104304601088816	-3.67160736688484
PRKAB1	0.0257164355931789	-3.0929387299595
PRKDC	0.0202497504938085	-3.3086358591353
PRMT6	0.0462038539506493	-2.56082189330733
PROSER3	0.000817559637444144	-6.55748227725314
PRR3	0.00576184795262204	-4.00454413558801
PRR11	0.00139678556250954	-5.87834913761224
PRR36	0.0323485743332973	-2.88948772090384
PRRC2B	0.0414896563771817	-2.41755549093606
PRSS53	0.0197833965922938	-3.20613896217245
PSIP1	0.0058895787238528	-4.44361487724002
PSMC3IP	0.00616117956396412	-4.43055251780483
PSRC1	0.00546847293380144	-4.53410545094015
PTBP1	0.000942273669512428	-6.15365576645605
PTBP3	0.00334239735578074	-4.65414102830211
PTGFRN	0.0274183086764086	-2.99319207535817
PTK7	0.0253516829720842	-3.05628971223963
PTTG1	0.000204091809730681	-7.63539547793871
QSER1	0.00302691069227407	-5.20267569745221
QSOX1	0.0036855484004674	-4.50554149323247
RAB3C	0.0275048755974729	-3.04202620907569
RAB3IP	0.0371572899498824	-2.7016841108437
RAB11B	0.0176591189568923	-3.37591157444587
RAB12	0.0104513394408727	-3.69622050396852
RAB39A	0.00951301953097104	-4.0175788475032
RABGAP1L	0.0342784011063729	-2.72394913076675
RACGAP1	0.00703917038638226	-4.27701284795624
RAD21	0.00602129313152403	-4.34009866725375
RAD54B	0.0387896366945123	-2.66405904061503
RAD54L	0.0184361538879876	-3.41190073054631
RALY	0.0293153501931001	-2.98464618264286
RANBP3	0.00568600104103792	-4.43089325982945
RBBP4	0.0495737658915269	-2.53246072598403
RBBP5	0.0386893138544831	-2.11206752039082
RBBP8	0.0299340644536369	-2.99071575075103
RBL1	0.000430148373035582	-7.21170084916559
RBM4B	0.0192412246922042	-3.18021900380829
RBM14	0.0414614369798462	-2.617479074873
RBM15	0.000316878033411466	-5.8887164753906
RBM38	0.0057820301316881	-4.55532837887337
RBPJ	0.00432186982349456	-4.81533505882341
RC3H2	0.0127967655367359	-3.60937573820894
RCAN1	0.0132568239902818	-3.69107966128742
RCC1	0.0357813477814877	-2.7150711490297
RCC2	0.0309965642897332	-2.96077178417173
RCOR2	0.0116939846500226	-3.84830601039456
RDH10	0.0151669123241067	-3.52079232142788
RDM1	0.0341990676983724	-2.77984253321431
RECQL4	0.00631509517987673	-4.22289545498487
REEP2	0.0473755166705493	-2.61050753654587
REV3L	0.0180064532646102	-3.44513937084941
REXO1	0.0172242763259168	-3.18429799697798
RFC5	0.000337401155021662	-6.50112043535947
RFX2	0.0379136679021415	-2.77463603317157
RGL3	0.0261487971813898	-3.07128129307576
RGS3	0.0122612180939325	-3.70793422650344
RGS7	0.0420974614960008	-2.71192349583522
RGS12	0.0163350663214408	-3.53682091204939
RGS16	0.00791245249240703	-4.23177028426945
RHBDL3	0.0299211752319579	-2.99089980564884
RHOBTB3	0.0159552701970458	-3.48394813534397
RIBC2	0.0121481629205043	-3.7982311534407
RIMBP2	0.0212774798911377	-3.21851199376388
RIMKLA	0.00990002191847023	-4.02977384236241
RIMS2	0.03258989119429	-2.89606450775705
RING1	0.0287609703766163	-2.81249697791029
RIOX1	0.0209169088501106	-3.28977421784824
RIPK1	0.0185001757658822	-3.3180052128121
RIPPLY3	0.0343391248522001	-2.88343151504522
RNASEH2A	0.00515086411627488	-4.63765445647411
RNF165	0.032327748427787	-2.89677449105137
RNF183	0.0237954045010623	-3.20579787904328
RNF214	0.0350833605922035	-2.72681156594058
RNF220	0.0199682204722481	-3.30018816005012
RNFT2	0.00243423195268384	-5.21441445328163
RPGR	0.0231976124780641	-2.99949809595498
RRM1	0.0378645806666788	-2.77725472887172
RRM2	0.0383962216849089	-2.75483717507954
RTBDN	0.0448657374375214	-2.65621616754287
RTKN2	0.0358838600944786	-2.82771405218057
RTN2	0.0201448625282059	-3.33286606399341
RTN3	0.0432003470870045	-2.62879122987762
RUNDC3A	0.0375209585219923	-2.78709812895909
S100PBP	0.00569397513524551	-4.40838810819968
SAE1	0.0188983718785115	-3.35109297741567
SAFB	0.0169615197023308	-3.1488558019374
SALL2	0.0401835299373593	-2.73898332909328
SAMD1	0.0278851420579778	-3.05557684028258
SAP30	0.00908026402409735	-3.84269636369165
SAPCD2	0.0425819972794119	-2.6932495944695
SBK1	0.00824975140015133	-4.20309156106874
SCAF4	0.0289075315726554	-2.91563995930735
SCAI	0.0166869087872641	-3.2996497728662
SCD5	0.035321276237375	-2.83734795499026
SCG2	0.0499848728060027	-2.56514722178312
SCG3	0.0389974622354921	-2.76821744055082
SCGB2B2	0.0315929715318788	-2.48185549061323
SCLY	0.0411481878988448	-2.67683635839769
SCRIB	0.0326857947354039	-2.70451580873828
SDCBP	0.0411823662786475	-2.53736161838425
SDK2	0.0170303562718928	-3.40502603832828
SEC61A2	0.0126012839373367	-3.1554467849051
SEMA4C	0.00809637418057452	-4.12255642385895
SEMA6C	0.0153364278910713	-3.42209091798661
SEPSECS	0.0107273879763322	-3.3032322345781
SEPT9	0.0480327789591684	-2.5356581464276
SESTD1	0.0198759813876328	-3.33229137830539
SEZ6	0.035368827816202	-2.76477822437626
SEZ6L	0.0430092672276023	-2.68438359458968
SF3A2	0.000754922732185607	-6.23601785922166
SFTA3	0.0280531864296625	-3.06148427645846
SGO1	0.0015771084444307	-5.73202034071975
SGO2	0.0254842432012244	-3.0794462960313
SGTA	0.00976650808070819	-3.76121359727466
SH3BP2	0.00140984858765199	-4.87294278774983
SH3GLB1	0.000626874734994127	-5.56152129508996
SH3RF3	0.0126191072591318	-3.74674863244155
SHB	0.0158042210796642	-3.54214035586121
SHKBP1	0.046137033444298	-2.61328323783754
SIPA1L3	0.0267390379357174	-3.00456761492301
SIRT6	0.034616064798306	-2.58824408288173
SIX2	0.0105972427292305	-3.85511099244581
SKA1	0.0266582668111787	-3.0617299074484
SKA2	0.0152350069350837	-3.44668705368879
SKAP2	0.0191001204326979	-3.14907055559655
SLBP	0.0198885125968863	-3.24392543869378
SLC2A6	0.0233230537343689	-3.02736217833219
SLC5A3	0.0311105457964496	-2.95492046744487
SLC6A17	0.00812514798729816	-4.04600786709279
SLC9A6	0.0240884472325442	-3.02935859410935
SLC20A1	0.034103456369744	-2.87607745590384
SLC25A19	0.0017486432597931	-5.4999311488336
SLC27A3	0.0181913836512965	-3.32229145668235
SLC29A4	0.0300423903004514	-2.8486804819893
SLC36A4	0.00541320908846087	-4.66001588542234
SLC38A1	0.0122540852175174	-3.67351425114828
SLC44A1	0.00483072204909963	-3.98358810475517
SLCO3A1	0.0373237773994707	-2.78867880764776
SLFNL1	0.024929195824886	-2.73113654076612
SMAP1	0.00750676122545863	-3.44514308952272
SMARCAL1	0.0199348658421927	-3.09601270499585
SMARCD1	0.0106385604544453	-3.87579358358203
SMC2	0.0182868130456859	-3.35443582016459
SMC3	0.00566720569080384	-4.36816253110836
SMG9	0.0400903297515676	-2.7190489682604
SMIM13	0.0186032763289505	-3.38795541638869
SMPD3	0.0197778387330607	-3.31191310368803
SMYD3	0.035167786150626	-2.83994848731673
SNAP25	0.0426574813890212	-2.64798281822317
SNCAIP	0.0478514866621968	-2.59259588562636
SNF8	0.0374959449465468	-2.67794972596544
SNRNP200	0.0154499786033253	-3.36105389904045
SNRPA	0.00963815707827877	-3.77340989696411
SNX30	0.0129338733493102	-3.71767975004085
SOCS4	0.0241027751484575	-3.18505896843541
SOGA3	0.0107678236107136	-3.9272061283208
SORCS2	0.0301520135511162	-2.99108590752247
SORT1	0.0443495186052045	-2.6557865685757
SOX2	0.0207433482047706	-3.33047271353363
SOX4	0.0132223762067268	-3.74395999012875
SP2	0.0287141293096706	-2.81587067696499
SP4	0.00643943947453792	-4.40607828342946
SPAG5	0.000955260702419142	-6.45984055135373
SPAG6	0.0471426295883772	-2.59489007681127
SPATA6L	0.0276808833016375	-2.88512700259323
SPDL1	0.00238978764354779	-5.14629018775066
SPEN	0.00338325835448528	-4.92159807535778
SPIRE2	0.00591939807166238	-4.37706867468045
SPPL2B	0.00455532844845039	-4.5717702289238
SPTAN1	0.0397270265342895	-2.66211363074284
SRGAP1	0.0189499576327854	-3.36502330453218
SRGAP2	0.0282418574556262	-2.96278440476683
SRRM3	0.0448952417907209	-2.61926545311952
SRSF1	0.0359841544477146	-2.7409604834239
SSH2	0.00546761296241914	-4.26627910060221
SSRP1	0.0244007736553669	-3.09056241444323
SSX2IP	0.0415755317575031	-2.70339238967852
ST6GAL2	0.0484450422744523	-2.57048656527955
ST18	0.0468177738675507	-2.54039416264821
STARD4	0.00408643261104842	-4.50656035104262
STARD9	0.00703711966974688	-4.20993622483123
STEAP3	0.018256141607548	-3.38843160873498
STIL	0.0178346183222521	-3.42457823211577
STIM2	0.00484302739791763	-4.49078239943239
STK25	0.0225820562814775	-3.21894431501609
STK33	0.0216437047700608	-3.26910078509708
STK38	0.043225522914736	-2.6546264584721
STMN1	0.00863239467197617	-4.11817926662909
STMN3	0.0471662443173403	-2.60904646207258
STON2	0.0113030878246055	-3.66934744670413
STPG1	0.0274388054487149	-3.00426556073411
STRIP1	0.00746526377154729	-3.98369588123751
STX1A	0.0343829019996727	-2.82558063421562
STX2	0.0175051819784023	-3.38584944197845
STXBP1	0.0144754836123792	-3.58318780280338
SUPT6H	0.0175201573348047	-2.68963672266436
SUZ12	0.0182862975258538	-3.36622933305885
SYDE2	0.0364069233619515	-2.83112566622857
SYK	0.00567776656320196	-4.24755200870945
SYNE2	0.0398845556716534	-2.75606101843023
SYP	0.0178695694274574	-3.27222555994161
SYT13	0.017033003944416	-3.47636312262089
SYTL3	0.0121457306098956	-3.83591023272087
TACC3	0.00243128212069753	-5.36337605816274
TADA2A	0.00636157590817361	-4.37013397566358
TAF2	0.048458167943705	-2.54324377145165
TAF3	0.0212044044433311	-3.25440766320291
TAF12	0.0152371100779279	-3.43533385244798
TAF15	0.0162454911751376	-2.90834093343213
TAGLN3	0.0152440087410628	-3.6116460304086
TAOK1	0.0186101558484405	-3.2225802066608
TARDBP	0.0447745672286415	-2.42984855457662
TBC1D31	0.017468071257173	-3.42058659590353
TBCB	0.0322681918684973	-2.89007942849509
TBP	0.0416229506560704	-2.53353402513199
TBX6	0.0151151476964489	-3.48680737287829
TBX19	0.0175191041480864	-3.1970818172935
TCEANC2	0.0480028079724011	-2.54627613714193
TCF3	0.00864941120122356	-3.93250654457839
TCF19	0.0370500649130722	-2.8094664510048
TEAD1	0.000884191830533358	-6.82965542923438
TECR	0.00247774675593102	-5.11071360254415
TEKT2	0.00302714937364358	-5.11465331741897
TET1	0.00272112223998039	-5.41768559268833
TFCP2L1	0.0208099983113906	-3.31061572995863
TGFA	0.0303295333539876	-2.76470604280273
TGFBR1	0.0293254440087188	-2.87544746861457
THAP8	0.0282122965604259	-3.02917216605155
TIAM1	0.0458347026749933	-2.63290449839511
TIGD2	0.0413532549050095	-2.59924975806542
TIGD3	0.00645483686772709	-4.44172318932263
TIMELESS	0.000315181456912313	-7.91380193246428
TIPIN	0.0402068653879453	-2.71903247223466
TJP2	0.00209092019764823	-4.79394181998542
TLE6	0.0113919731290726	-3.86188794594856
TMEFF1	0.00531699780575705	-4.67461930292024
TMEM39B	0.000209078728764733	-8.29216223405611
TMEM51	0.00218251747554684	-4.85937593574632
TMEM61	0.0201810193549436	-3.35000446824795
TMEM65	0.00972609587450413	-3.90540156987993
TMEM81	0.0262940584306761	-3.0028510233148
TMEM86B	0.0484634378849399	-2.56117525824325
TMEM89	0.00304769186612639	-4.56463029954986
TMEM94	0.00571234069454988	-4.02414984331431
TMEM104	0.0254643684397107	-3.1116381733681
TMEM116	0.0260112452897339	-2.85826332551806
TMEM143	0.0123535854234385	-3.603079117644
TMEM145	0.0473671236263038	-2.61146551841008
TMEM169	0.0111159270329665	-3.87045608858767
TMEM181	0.00532720788272891	-4.54674685246337
TMEM184B	0.0324558773835272	-2.89134642181607
TMEM198	0.0113575123965247	-3.8128796529362
TMEM201	0.0269527024046431	-3.04921050286092
TMEM249	0.00526028134999433	-3.57204219007855
TMEM260	0.0395783398582088	-2.69483078004989
TMPO	0.0114811890004168	-3.74403569787758
TMPRSS13	0.00764717112563934	-4.22697680207036
TMUB2	0.00638143341538936	-3.65821467384395
TMX1	0.0292012616542284	-2.98966389294718
TNFAIP8L1	0.0489821204579688	-2.55629669833013
TNFRSF25	0.00693819600996981	-4.37357965515165
TNRC6C	0.0324696335322903	-2.85427464090597
TNS1	0.0486355755816899	-2.42979874962186
TOE1	0.0123137145211484	-3.77648969760231
TONSL	0.0164789050599717	-3.39075777158486
TOP2A	0.00562930320383847	-4.59036776113407
TOX	0.000835379511457552	-6.99275961172393
TOX3	0.0376590740354985	-2.80169832070377
TP53BP2	0.0310579855895767	-2.95276554336158
TP53I3	0.031170010799241	-2.96390456570552
TPBG	0.0377260759337894	-2.79688898272719
TPGS2	0.0125167198393771	-3.64644049340141
TPX2	0.00912976439776668	-4.09062152899998
TRAIP	0.0184674646643796	-3.26117513424732
TRAPPC10	0.00424462875783226	-4.60011672169375
TRIB2	0.0115293866775081	-3.8538307861104
TRIL	0.0349967415070474	-2.84764316173699
TRIM9	0.0112316876842407	-3.91196785371042
TRIM28	0.0352836402566553	-2.83641295672681
TRIM45	0.0233749257424987	-3.12440258651764
TRIO	0.0114678364581402	-3.78016867537125
TROAP	0.0139579734829066	-3.63864339318942
TSEN54	0.0494947939093266	-2.45580119571399
TSGA10	0.0424556695422629	-2.53367490158982
TSPAN12	0.0101493852636885	-3.80428587950121
TTC9	0.0270893605641449	-3.05394896634044
TTC28	0.0499304507334904	-2.44518184938449
TTC30B	0.0269217711574389	-2.78054398836535
TTC39B	0.0322560118501321	-2.92811062454385
TTI1	0.0282046122065498	-2.95390185539868
TTK	0.00414787023698394	-4.74256972490676
TTL	0.000591791053170186	-6.54532741248749
TTLL4	0.0056713586268064	-3.87048663060117
TUBA1A	0.0314855552755222	-2.95353754506948
TUBB2B	0.00230847038063473	-5.65932301824721
TUBB3	0.02132747072715	-3.22542607198049
TUBG1	0.00225224592933591	-5.31717358430375
TULP4	0.0183321856699052	-3.36269955633453
TXLNA	0.00241428008131639	-3.93363985374057
TYMS	0.0190790424054907	-3.38434335928727
U2AF2	0.0345885890180123	-2.80446199395894
UBA2	0.0460804961475455	-2.59105660469914
UBE2C	0.00625131618325629	-4.45333263151107
UBE2T	0.0092506890226347	-3.73462256198646
UBE3D	0.024170659564111	-3.13158155358232
UBXN2B	0.00290052649594231	-4.5805152543426
UGT8	0.0464950549157763	-2.59450408424998
UHRF1	0.00160034539576346	-5.94800384280707
UNC13A	0.0103463651043535	-3.79672473993217
UNG	0.0488933077754584	-2.54764726228467
UNK	0.0145805218510116	-3.44359314165346
USP1	0.0140172113732464	-3.63973767063242
USP2	0.0189436146532314	-3.31620453967724
USP11	0.0107828330670517	-3.86144643268767
USP37	0.0277875857592219	-3.05455247070365
USP41	0.0353201802643651	-2.75755102941586
USP49	0.00649420240607891	-4.33785630507364
VAT1	0.00880729206352328	-3.3008681379216
VAV2	0.00587658824847981	-4.30437135531379
VEZF1	0.00130879445297375	-6.03935580905115
VMA21	0.0124270567921073	-3.48413985501032
VOPP1	0.0325864482963661	-2.89569023271633
VRK1	0.0247161900597673	-3.09640177630705
VTA1	0.0053901464936297	-4.08051951674206
VWA5B2	0.0416369170874267	-2.65207439603384
WDCP	0.00201342789057424	-5.21092068039096
WDR18	0.0279958903066779	-2.87704036991248
WDR34	0.0130558488173515	-3.69910224530622
WDR47	0.000106464592956087	-6.32371058515583
WDR62	0.00699461423974508	-4.37980640079328
WDTC1	0.016304999251963	-3.4641193989497
WEE1	0.035600304625129	-2.82165994325383
WIPF2	0.0285604062429458	-2.7597652607644
WRAP53	0.0343205748341442	-2.73036033356271
WRAP73	0.0280621855515429	-3.03129954857794
WRNIP1	0.011674570428173	-3.41062956937646
XKR7	0.0354248357218859	-2.84068736935488
XKRX	0.0305116771159952	-2.96660637345362
XRCC1	0.0222330346830127	-3.20127628856074
XRCC3	0.00959613556291649	-3.89576085141278
YPEL1	0.0106165390574812	-3.91020325815392
YWHAH	0.0281209283917855	-2.80942904893844
ZBTB5	0.0343723898230871	-2.82971776599577
ZBTB12	0.030770191891584	-2.89934982509446
ZBTB39	0.0418559138328454	-2.65180636523526
ZC3H4	0.0193265255027919	-2.97841852859314
ZC3H10	0.0459314575813295	-2.57725526374649
ZCCHC3	0.024966720338228	-2.75429832345685
ZCCHC4	0.0439924932173266	-2.5190071074366
ZCCHC11	0.0283020893309693	-3.01514577638737
ZCCHC14	0.00149186011905548	-5.3048479735479
ZDHHC4	0.00857032003294857	-3.54806074192616
ZDHHC13	0.0129861269419586	-3.73729238448844
ZDHHC15	0.0413142669768444	-2.70707800060692
ZFHX2	0.00117761281659673	-6.29682272195695
ZFP37	0.0476830621706914	-2.57401142656094
ZFYVE1	0.0363524368383408	-2.77440047560018
ZIC2	0.000923452572104782	-6.97368155835851
ZIC5	0.00845229825711394	-4.1958442122156
ZMAT4	0.00998305192271285	-4.0190568452793
ZMIZ2	0.0475239222278071	-2.52862117288453
ZMYM3	0.0408754002868723	-2.68619096855598
ZNF8	0.00568621057025402	-4.42801988097275
ZNF34	0.0199010038460398	-3.25288128353044
ZNF48	0.0305136881529569	-2.93926110899823
ZNF165	0.0410503324032728	-2.70062387487737
ZNF184	0.0270588901723439	-3.01400248620278
ZNF230	0.0463773061337505	-2.60689710874934
ZNF250	0.0166391943409893	-3.46416857811143
ZNF292	0.0252108217671145	-3.05814357253265
ZNF296	0.0355039925327335	-2.2546990947837
ZNF318	0.0268325914852493	-2.85231417887944
ZNF324	0.0311573551018924	-2.94046867889355
ZNF324B	0.0402343931060876	-2.70893513535394
ZNF367	0.0311094001165362	-2.96353950671561
ZNF428	0.0486057878479559	-2.5152050493981
ZNF445	0.00185077455553619	-3.81733883872217
ZNF496	0.0166436346147167	-3.40078620558331
ZNF507	0.00867995770736637	-3.57530668551653
ZNF512	0.0386263596550843	-2.55455708033482
ZNF574	0.0373220633365207	-2.75493027671275
ZNF584	0.0040181151020287	-4.41996272589941
ZNF620	0.000158587110086803	-9.09186238046579
ZNF629	0.0365092515414642	-2.72786220746084
ZNF646	0.0418926549565837	-2.67958554574131
ZNF669	0.0479856463716761	-2.4639501539365
ZNF684	0.00259957281023708	-4.97385966850565
ZNF691	0.0310510966844971	-2.78542665196095
ZNF713	0.0094299561798282	-3.92779106695764
ZNF878	0.00282813176908815	-4.9692100612074
ZNRF1	0.0245028403534684	-3.17278640904852
ZRANB1	0.00330352510113855	-4.0305126301557
ZSCAN9	0.00295061828800579	-5.08211311945056
ZSCAN16	0.0219024065853114	-3.20166924998201
ZSCAN22	0.00173801898397054	-5.47766129024971
ZSWIM3	0.0343647756672593	-2.75717513351549
ZSWIM4	0.0256003898359029	-3.01520891470581
ZSWIM6	0.0161354883215448	-3.503366436939
ZWINT	0.0125942256017903	-3.71750029668997

## Sheet: table4
ID2 UP 50 signature
IFI27
IFI6
ID2
BST2
IFITM1
OAS2
NTS
KRT81
NLRC5
MX2
UBE2L6
GBP1
SAMD9L
ATF3
IFI44L
FGF21
SPX
IGHE
CPA4
MIR137HG
ROCK1P1
IFI16
CXCL8
FAM133A
LGALS3BP
CCR4
SCN8A
IFIH1
SEC31B
L1CAM
SAMD9
DHRS2
MAGEC2
IRF9
RSAD2
UNC5C
PDE1C
CEACAM6
SLFN5
LHX1
GPR135
NMRAL2P
U2AF1
BEST1
PARP9
GABPB1-AS1
KRT6A
NKTR
PWP2
NEAT1

## Sheet: table5
gene_id	CTRL1	CTRL2	CTRL3	CTRL4	OE1	OE2	OE3	OE4	gene_name
ENSG00000198804	311860	303938	377437	346584	251114	257193	329262	310655	MT-CO1
ENSG00000198886	126901	133917	126817	136511	104206	107936	150287	138959	MT-ND4
ENSG00000156508	113830	101279	107811	106109	81225	85249	83077	85508	EEF1A1
ENSG00000198938	122703	102806	118843	101343	80434	81470	85448	89259	MT-CO3
ENSG00000075624	73281	66726	60111	70656	68597	68013	52914	63154	ACTB
ENSG00000210082	88325	88641	139332	99585	67189	67704	105959	85865	MT-RNR2
ENSG00000198712	99397	82828	102690	92066	66727	67393	91363	79826	MT-CO2
ENSG00000184009	72446	65242	76979	78698	66455	66526	55740	63262	ACTG1
ENSG00000198899	81885	79299	71772	70265	58414	63495	68483	63738	MT-ATP6
ENSG00000080824	52428	53747	25896	30404	55490	57483	49690	63371	HSP90AA1
ENSG00000074800	73810	68627	106344	79519	55001	51774	63825	53085	ENO1
ENSG00000167996	61501	54379	49152	65545	54181	57532	45846	54383	FTH1
ENSG00000196924	37692	50117	101183	68715	52399	46632	37262	46628	FLNA
ENSG00000111640	56599	55974	86360	65250	50265	50111	55002	50927	GAPDH
ENSG00000198888	55093	54220	53034	44574	49557	50956	36516	44926	MT-ND1
ENSG00000096384	48198	45718	39755	42213	46561	45208	38094	44797	HSP90AB1
ENSG00000261236	49744	42112	59174	42778	45765	43776	34084	35607	BOP1
ENSG00000140988	63038	49796	51327	59602	41832	41471	39104	35505	RPS2
ENSG00000167658	39165	41425	78644	53677	41754	39082	34025	35880	EEF2
ENSG00000134333	61932	57987	54685	54221	41732	40175	51015	48062	LDHA
ENSG00000198727	46731	47260	61448	48415	41607	42590	53117	52090	MT-CYB
ENSG00000179091	45840	43225	50447	47991	41355	37215	33142	32747	CYC1
ENSG00000067225	42701	42392	53089	44401	40690	38431	36983	36242	PKM
ENSG00000198763	46847	45182	39676	39887	40117	42232	37633	38879	MT-ND2
ENSG00000198786	42355	50646	71940	51456	39640	40085	56838	50352	MT-ND5
ENSG00000102144	62149	56584	52089	64716	39142	37477	52056	45996	PGK1
ENSG00000161016	47728	39506	49629	49464	34454	30569	34166	31388	RPL8
ENSG00000065978	43363	41948	40479	39294	34193	32900	31208	30867	YBX1
ENSG00000110955	40009	35500	35986	35819	34126	33160	26603	31511	ATP5F1B
ENSG00000109971	31957	30861	28344	29390	32430	32769	29039	35987	HSPA8
ENSG00000142541	45848	39238	47605	45565	31889	27798	32902	26540	RPL13A
ENSG00000178209	17210	24303	50248	30471	31772	28919	23566	24973	PLEC
ENSG00000144381	35206	31546	18161	23907	29572	30893	25436	34654	HSPD1
ENSG00000138326	46004	38155	17427	29745	29475	27190	33270	32168	RPS24
ENSG00000181163	35362	32366	12621	19114	29427	29329	21176	26842	NPM1
ENSG00000070756	30850	31184	32272	32211	29311	30524	26697	32818	PABPC1
ENSG00000137309	23111	22679	28044	22932	25519	23983	21851	21244	HMGA1
ENSG00000147403	36471	30540	24727	33102	24883	23339	21028	22654	RPL10
ENSG00000089157	33766	29177	39833	33753	24691	23240	21742	23015	RPLP0
ENSG00000115053	27159	27664	16234	17412	24676	23266	19057	22183	NCL
ENSG00000110321	24367	26199	22344	20845	24524	25950	18562	26482	EIF4G2
ENSG00000182718	23709	20338	13301	18116	21416	20902	22300	20232	ANXA2
ENSG00000168028	29689	24591	26165	27457	20255	20481	19447	18110	RPSA
ENSG00000124942	13662	21733	33847	26333	19907	17422	18493	23589	AHNAK
ENSG00000196230	21199	20158	23594	23463	19794	19685	19135	21262	TUBB
ENSG00000198431	14264	15554	9579	13163	19245	19918	13284	19756	TXNRD1
ENSG00000185122	17758	17347	23231	19106	18784	18536	16133	16155	HSF1
ENSG00000174444	24566	21978	26796	23984	18410	17384	18789	18630	RPL4
ENSG00000100316	25708	22509	26831	26473	18207	17870	20442	18211	RPL3
ENSG00000187514	25213	22010	18938	21134	18126	17080	18433	17650	PTMA
ENSG00000167526	25274	19802	29563	26461	17916	16726	19394	17032	RPL13
ENSG00000196262	24231	19752	11765	16132	17777	17436	15780	16431	PPIA
ENSG00000135486	21944	20707	15947	17701	17387	17027	16980	18883	HNRNPA1
ENSG00000179218	17064	15953	19539	18391	17315	15661	19544	16281	CALR
ENSG00000122566	21089	20691	8634	12490	17217	16676	14767	17570	HNRNPA2B1
ENSG00000158710	20379	18113	16011	20314	17207	15675	16176	14590	TAGLN2
ENSG00000083845	24200	19320	23457	21400	17142	15813	15451	15310	RPS5
ENSG00000197102	8322	13433	19635	13779	17117	15580	10029	14917	DYNC1H1
ENSG00000009307	17926	19683	11885	14311	17064	17283	13707	17845	CSDE1
ENSG00000188229	17243	16285	20052	18547	17035	16387	14385	15840	TUBB4B
ENSG00000117592	20154	17055	17784	17901	16995	16736	16952	18798	PRDX6
ENSG00000198034	23732	19543	19291	20664	16854	15610	16977	16458	RPS4X
ENSG00000147604	23753	21118	16613	17156	16784	15625	16762	17124	RPL7
ENSG00000147065	14757	17840	22244	19704	16762	15564	15546	16654	MSN
ENSG00000204628	21319	18784	24700	20575	16233	15977	15277	16025	RACK1
ENSG00000132341	21093	17836	13136	15900	16205	15970	13833	15658	RAN
ENSG00000130726	15417	13864	19560	16105	16171	15951	11394	13126	TRIM28
ENSG00000105640	23491	19434	24080	24181	15955	14391	16082	14835	RPL18A
ENSG00000132507	20327	18234	27485	16649	15954	14556	13823	12626	EIF5A
ENSG00000108179	16554	14620	10670	11873	15930	15291	8800	12077	PPIF
ENSG00000164924	17747	18025	15583	15755	15760	16108	17362	18003	YWHAZ
ENSG00000122406	21973	19638	13296	17468	15594	15410	14392	15333	RPL5
ENSG00000072274	9860	10997	5390	7840	15541	16318	9616	15083	TFRC
ENSG00000129351	13437	15024	15528	14652	15442	14532	11303	13388	ILF3
ENSG00000149273	22100	18232	22166	21902	15439	13701	15725	14747	RPS3
ENSG00000111669	21089	17216	22803	20794	15278	14309	17447	15428	TPI1
ENSG00000142534	24738	19923	18201	21495	15251	13777	16188	13917	RPS11
ENSG00000035403	10826	13937	18431	15929	15238	14749	13096	16758	VCL
ENSG00000179632	14065	12585	19072	15415	15220	14280	14500	12559	MAF1
ENSG00000163468	16814	15879	17843	15602	15171	14584	14033	14423	CCT3
ENSG00000153187	14665	15600	10707	11758	15128	14635	11748	14674	HNRNPU
ENSG00000075618	15376	15233	18412	15892	15054	14208	13038	12576	FSCN1
ENSG00000150093	13702	14462	7904	13142	15032	16128	17498	18798	ITGB1
ENSG00000123416	15872	16042	22126	19326	14862	15325	13417	14176	TUBA1B
ENSG00000197958	21723	18093	15940	18864	14826	13164	15160	13456	RPL12
ENSG00000148303	21326	17171	18581	21309	14815	13858	14569	15268	RPL7A
ENSG00000087086	15539	12580	13715	14453	14665	14546	12789	14415	FTL
ENSG00000174748	18491	16818	16572	18972	14550	13211	14822	14737	RPL15
ENSG00000150991	15168	14137	15549	14239	14500	13196	15239	13540	UBC
ENSG00000005022	18789	16143	16278	16968	14470	14993	11995	13872	SLC25A5
ENSG00000163399	13022	14334	19441	15974	14453	14342	12675	13695	ATP1A1
ENSG00000160789	13863	12688	18398	15641	14443	13083	14493	12556	LMNA
ENSG00000167978	8108	13749	16416	13089	14432	13313	9645	13848	SRRM2
ENSG00000089009	21166	18447	13171	16213	14430	13696	14951	15035	RPL6
ENSG00000142864	16441	15916	12066	12702	14346	14764	12973	14791	SERBP1
ENSG00000114867	11164	12549	20507	14056	14228	13174	10297	12311	EIF4G1
ENSG00000087460	17416	16674	14213	18390	14221	14503	16242	14951	GNAS
ENSG00000044574	13503	11795	9941	12617	14164	14548	14781	16383	HSPA5
ENSG00000212907	12142	17381	20773	17582	14122	11435	18424	19023	MT-ND4L
ENSG00000103187	14388	13348	15547	13302	13975	13301	10914	11462	COTL1
ENSG00000197858	15655	13113	24449	21146	13940	14266	15424	15511	GPAA1
ENSG00000133030	9428	10654	15516	12229	13774	13399	12667	13495	MPRIP
ENSG00000099250	11303	13247	9485	10113	13653	13941	12229	12950	NRP1
ENSG00000108107	18272	14149	14719	17609	13493	11895	12233	11489	RPL28
ENSG00000170889	17622	14213	16132	16538	13440	12033	11863	10674	RPS9
ENSG00000108518	17885	14467	10021	14724	13355	13260	11545	11294	PFN1
ENSG00000113013	14209	13975	8752	10112	13178	13298	10126	13320	HSPA9
ENSG00000143537	15833	14822	25333	18511	13126	12587	14555	13054	ADAM15
ENSG00000143761	14354	13562	16699	16306	13054	12885	13708	13613	ARF1
ENSG00000143321	15928	14289	16663	14755	13008	12552	11132	10633	HDGF
ENSG00000172270	13796	12532	11581	15713	12890	12170	12225	10871	BSG
ENSG00000159840	14245	13830	12513	15247	12684	12360	11296	9690	ZYX
ENSG00000142937	18649	14805	15264	16465	12643	11128	13250	12100	RPS8
ENSG00000184216	11907	12963	17941	12621	12627	12050	9724	9415	IRAK1
ENSG00000142156	10604	11599	17292	17096	12585	11555	14828	12715	COL6A1
ENSG00000108654	13568	13097	4419	8637	12456	12966	9900	13056	DDX5
ENSG00000100345	8276	10808	19018	12302	12437	11420	9278	10521	MYH9
ENSG00000034510	21334	15543	10800	17509	12434	10163	14625	11673	TMSB10
ENSG00000110958	13645	12245	10451	12773	12354	12879	11708	13995	PTGES3
ENSG00000150753	13952	12922	9724	10840	12348	12547	10328	12294	CCT5
ENSG00000162244	17162	14790	19249	16531	12236	10682	13722	12202	RPL29
ENSG00000122359	11292	10839	13913	12515	12033	11482	11300	11013	ANXA11
ENSG00000169710	9736	12142	18421	13732	12016	11362	7028	9403	FASN
ENSG00000165119	12671	12522	8160	10810	11906	11504	9546	11649	HNRNPK
ENSG00000127022	10421	11847	10921	10645	11844	12332	10740	14195	CANX
ENSG00000132688	11637	11991	24060	14736	11842	11060	12951	12391	NES
ENSG00000161203	11426	10665	11628	11800	11775	11837	10414	10839	AP2M1
ENSG00000166598	11721	11448	6183	9611	11497	12419	18385	18221	HSP90B1
ENSG00000128050	13631	13703	7670	10297	11361	12162	11359	12856	PAICS
ENSG00000205542	14795	11809	6472	11387	11255	10790	14546	11598	TMSB4X
ENSG00000084234	10534	10546	10080	11660	11228	10559	12294	11743	APLP2
ENSG00000198840	17517	13738	24488	14697	11202	8736	15226	13104	MT-ND3
ENSG00000143549	11964	11322	9753	9754	11053	10916	9077	10293	TPM3
ENSG00000167553	11814	10761	9965	12705	11004	11380	9536	10901	TUBA1C
ENSG00000171314	13952	13108	15517	14617	11002	10528	12251	11462	PGAM1
ENSG00000092199	13273	12300	9542	10729	10999	10516	9912	10860	HNRNPC
ENSG00000119335	13439	12607	9475	9452	10993	11313	9090	11043	SET
ENSG00000198695	16330	15963	20725	16101	10976	11664	19937	14218	MT-ND6
ENSG00000106211	14426	10946	9477	13883	10963	11040	11113	11976	HSPB1
ENSG00000147140	10842	11091	9100	11508	10890	10362	9020	10484	NONO
ENSG00000172757	15014	12017	10043	12691	10864	10836	9637	9394	CFL1
ENSG00000130402	7956	9790	13815	10500	10765	9701	9308	9002	ACTN4
ENSG00000253729	7500	10745	14303	10403	10749	10150	6552	11354	PRKDC
ENSG00000240342	14386	12104	15339	14970	10741	7658	10219	7123	RPS2P5
ENSG00000198363	10791	10964	6035	9027	10739	11273	11971	14876	ASPH
ENSG00000136997	15513	14685	10377	17275	10677	11128	10125	10278	MYC
ENSG00000221983	16191	12555	10013	12035	10423	9797	9275	9305	UBA52
ENSG00000088247	8840	10234	12192	10390	10423	9731	6932	8245	KHSRP
ENSG00000137962	9718	11781	6355	8690	10353	11059	12179	13423	ARHGAP29
ENSG00000137818	14410	10682	8039	12200	10314	9295	8847	8340	RPLP1
ENSG00000143799	9632	10227	9926	10102	10309	9738	7639	9234	PARP1
ENSG00000142192	9461	10319	9812	11283	10302	9662	10937	11335	APP
ENSG00000101210	10900	9667	13785	11804	10289	10037	9482	8286	EEF1A2
ENSG00000146731	11274	10597	6892	8022	10279	10144	9090	10604	CCT6A
ENSG00000163931	9549	9391	13789	11766	10231	9511	8229	9451	TKT
ENSG00000099783	11087	10223	9403	8102	10195	10178	7237	8523	HNRNPM
ENSG00000103257	8808	9881	13795	10568	10174	10088	6323	8520	SLC7A5
ENSG00000144713	15205	12538	12944	12178	10168	9326	10831	9710	RPL32
ENSG00000108953	11515	10925	9837	10122	10086	10312	10250	10793	YWHAE
ENSG00000106263	10599	9898	11833	9254	10078	9802	7385	8242	EIF3B
ENSG00000130985	8728	9591	13152	11297	10026	9730	8436	9351	UBA1
ENSG00000164587	15039	11932	12804	12720	10023	8688	10242	9442	RPS14
ENSG00000168906	11369	12042	3378	6662	9982	11088	8023	11044	MAT2A
ENSG00000117523	6580	11037	6939	6943	9970	9170	6834	9920	PRRC2C
ENSG00000174231	6202	8993	14849	10690	9944	9209	5961	8879	PRPF8
ENSG00000188846	12658	11573	9579	9841	9814	8893	8991	9090	RPL14
ENSG00000165637	11139	9488	7689	9505	9584	9851	8417	9990	VDAC2
ENSG00000136068	5134	7795	16419	10086	9526	8881	8171	9363	FLNB
ENSG00000139644	9746	9305	11494	10246	9449	9527	9115	9478	TMBIM6
ENSG00000141367	8340	9271	7214	7233	9413	9803	8490	11047	CLTC
ENSG00000011304	8486	8911	9757	9690	9404	8786	6177	7722	PTBP1
ENSG00000116133	7372	8292	13297	9348	9402	8695	7971	8426	DHCR24
ENSG00000116560	9679	9683	6852	8702	9387	9532	7454	9440	SFPQ
ENSG00000115758	11691	10048	8109	8775	9367	9441	5952	8236	ODC1
ENSG00000117450	11249	9651	6255	8795	9171	9389	8750	9050	PRDX1
ENSG00000089597	5026	5302	8403	7671	9148	8836	8877	9609	GANAB
ENSG00000231500	13865	11569	12718	12205	9112	7952	9996	8824	RPS18
ENSG00000100664	8003	7850	3404	5066	9073	9225	6240	8705	EIF5
ENSG00000105220	10289	10327	13258	11097	9037	8847	8370	8591	GPI
ENSG00000135624	11192	9905	12426	10780	9024	8956	8810	8901	CCT7
ENSG00000177600	14384	10658	7671	10910	9017	8078	8117	7634	RPLP2
ENSG00000110092	8383	9966	11975	10393	8999	8815	9253	9202	CCND1
ENSG00000132475	11482	9810	6664	8877	8998	8890	8004	8620	H3F3B
ENSG00000185624	9068	9259	12519	11957	8983	8773	10381	9286	P4HB
ENSG00000136942	14584	11461	10900	12452	8925	7643	9194	7643	RPL35
ENSG00000168439	9208	9168	12136	10268	8909	8218	9045	9604	STIP1
ENSG00000115677	7034	8695	13516	9638	8868	8371	8854	9233	HDLBP
ENSG00000188643	10994	9056	7618	9923	8837	8770	9665	8269	S100A16
ENSG00000137154	13669	11655	7941	10375	8814	8122	9007	9507	RPS6
ENSG00000211459	12689	10644	21233	13488	8791	9555	11927	10322	MT-RNR1
ENSG00000126457	9908	9134	7705	8734	8790	8527	6480	6917	PRMT1
ENSG00000118705	8222	7976	7106	7680	8586	9198	7886	9099	RPN2
ENSG00000189403	9883	9451	4158	5885	8551	8271	7248	8526	HMGB1
ENSG00000141753	10839	9240	10825	10014	8520	8091	7736	6815	IGFBP4
ENSG00000185803	7147	6768	7597	7037	8484	8252	7104	7773	SLC52A2
ENSG00000138279	9413	8716	6624	8261	8448	8726	7900	9036	ANXA7
ENSG00000108106	9431	7629	10587	9318	8427	8070	7857	6797	UBE2S
ENSG00000175166	7570	7517	9648	7178	8355	8142	6014	6858	PSMD2
ENSG00000166226	8465	8144	5309	6137	8340	8378	6550	8101	CCT2
ENSG00000115268	11646	8938	8742	10480	8332	7167	7471	6898	RPS15
ENSG00000075415	9835	8303	8634	8984	8318	8451	7013	8587	SLC25A3
ENSG00000166441	12624	9942	9482	11030	8294	7493	8363	7999	RPL27A
ENSG00000108424	6844	7900	5327	5703	8271	8044	6116	8195	KPNB1
ENSG00000136628	7436	8334	4277	5070	8201	8334	7153	8943	EPRS
ENSG00000182325	7977	6575	3325	5146	8174	8648	5810	7463	FBXL6
ENSG00000168672	10449	9957	7197	10016	8163	8964	8108	10084	FAM84B
ENSG00000106682	8174	8432	7466	8040	8160	7939	6918	7159	EIF4H
ENSG00000089280	8502	8294	5899	6594	8134	7533	6024	6479	FUS
ENSG00000105372	11920	8678	7953	9590	8110	7218	7731	7008	RPS19
ENSG00000197746	9133	8001	7884	11145	8104	7764	8885	8649	PSAP
ENSG00000063177	11526	8969	10032	11331	8103	7613	7577	7790	RPL18
ENSG00000099194	9425	11065	16010	13040	8083	7826	8724	9436	SCD
ENSG00000120438	8993	7749	5642	6327	8071	8543	6076	7940	TCP1
ENSG00000104419	11866	12727	22319	20528	8045	7519	22134	11226	NDRG1
ENSG00000104904	10135	7539	7172	9242	8007	8772	7559	7910	OAZ1
ENSG00000152234	10175	8705	7478	7983	8006	7959	6973	7848	ATP5F1A
ENSG00000047849	6390	7828	11542	8776	8003	7626	7289	7599	MAP4
ENSG00000162909	8060	8078	5425	7095	7999	8076	7188	8042	CAPN2
ENSG00000121579	7737	7229	4344	4761	7999	8284	5636	7839	NAA50
ENSG00000171858	15056	11081	7166	9997	7985	6058	7557	7110	RPS21
ENSG00000143947	12995	10331	6025	8331	7980	7965	7264	8089	RPS27A
ENSG00000065150	7551	8058	6071	6374	7960	8250	6114	8557	IPO5
ENSG00000083444	6741	6754	12606	11644	7890	7479	11599	9799	PLOD1
ENSG00000108561	8850	7435	6669	6688	7875	7514	5188	6880	C1QBP
ENSG00000100994	8767	8888	16473	11213	7853	7255	8914	7209	PYGB
ENSG00000124207	7878	8340	4376	5425	7838	8386	7270	9169	CSE1L
ENSG00000069275	8100	8642	6278	7972	7815	7924	7576	9175	NUCKS1
ENSG00000008513	7366	9461	12711	10511	7779	7188	7464	7310	ST3GAL1
ENSG00000242265	6643	8611	7456	7563	7764	7828	5228	9101	PEG10
ENSG00000005884	6059	6759	12962	9194	7695	7298	8940	7552	ITGA3
ENSG00000120694	6941	6899	4352	5007	7694	7782	7211	10064	HSPH1
ENSG00000081277	5915	6582	8101	7127	7684	7380	6049	6361	PKP1
ENSG00000130309	6842	6786	11273	8938	7682	7307	8109	7708	COLGALT1
ENSG00000067560	8718	7534	10055	8856	7643	7650	7730	7954	RHOA
ENSG00000135046	7212	6824	1952	3723	7623	8071	7613	7877	ANXA1
ENSG00000105401	7524	6839	5650	5679	7621	7211	6313	6137	CDC37
ENSG00000184640	7489	7728	12425	9530	7607	7343	8451	7199	2023-09-09
ENSG00000105193	11464	9245	9677	10151	7580	6653	7202	6955	RPS16
ENSG00000136830	7723	7260	9926	8647	7574	7140	7212	6567	FAM129B
ENSG00000233927	12075	8914	6161	9006	7541	5269	6704	6992	RPS28
ENSG00000116260	8499	8018	11232	11491	7535	7003	9633	7768	QSOX1
ENSG00000130702	5622	7039	8765	8043	7531	7004	7160	7858	LAMA5
ENSG00000197451	7309	6509	5950	6378	7516	7228	5733	6481	HNRNPAB
ENSG00000134308	8667	8018	7555	7612	7508	7657	6910	7457	YWHAQ
ENSG00000108298	10469	8568	7680	8577	7506	6890	7479	7063	RPL19
ENSG00000130175	7331	6538	8909	8955	7497	7055	6699	7469	PRKCSH
ENSG00000155380	8370	8348	5531	6439	7494	7965	7423	8221	SLC16A1
ENSG00000167986	6410	7236	12482	8477	7473	6964	5658	6749	DDB1
ENSG00000156515	6887	7403	10967	8434	7445	6984	6652	6613	HK1
ENSG00000229117	12791	9873	9007	10886	7444	7875	8464	8682	RPL41
ENSG00000103044	5423	6319	4485	4591	7402	6985	5208	5767	HAS3
ENSG00000130255	12991	9767	8202	10995	7393	6529	7694	7634	RPL36
ENSG00000196365	9261	8482	12547	10771	7385	7229	7196	7051	LONP1
ENSG00000130821	8980	8999	13360	10199	7381	7306	7023	6148	SLC6A8
ENSG00000167460	7811	7983	7197	7893	7373	7281	8700	8289	TPM4
ENSG00000114391	11052	8776	7528	8453	7317	6439	7332	6961	RPL24
ENSG00000166913	6862	6370	5941	5765	7311	7518	7506	7700	YWHAB
ENSG00000092201	7154	7585	4462	5473	7302	7278	6059	7762	SUPT16H
ENSG00000063244	6768	7251	7639	7889	7290	6246	5657	6000	U2AF2
ENSG00000197956	11800	8892	5713	9465	7276	6599	9587	6383	S100A6
ENSG00000165732	6140	7004	3068	3602	7258	7325	4274	6369	DDX21
ENSG00000079246	8040	8248	6492	6337	7232	7559	6479	7527	XRCC5
ENSG00000111371	6232	7706	3831	4955	7231	7492	4669	7263	SLC38A1
ENSG00000117983	4638	9005	10721	10148	7204	5659	5768	5589	MUC5B
ENSG00000090060	6751	7555	3967	5142	7200	7753	6880	8832	PAPOLA
ENSG00000062485	6937	7155	7840	7827	7184	7445	5348	7200	CS
ENSG00000160710	5202	6132	7553	6293	7181	6619	6986	7248	ADAR
ENSG00000127616	6324	7343	12455	8330	7170	6493	6379	6524	SMARCA4
ENSG00000071127	7070	6654	7859	7144	7116	6853	5895	6540	WDR1
ENSG00000165655	8358	7896	7247	8622	7092	7030	7197	6592	ZNF503
ENSG00000132361	5393	6114	6967	5590	7053	6909	3843	4995	CLUH
ENSG00000198668	8503	7918	5264	6513	7048	7413	7096	7630	CALM1
ENSG00000133112	9712	8358	8020	8584	6994	7210	7904	8481	TPT1
ENSG00000198830	8503	7221	6429	8010	6994	7473	6303	7624	HMGN2
ENSG00000174437	5584	6264	6542	6945	6985	6963	4995	7233	ATP2A2
ENSG00000144028	5183	7297	8447	7192	6967	6367	4760	6118	SNRNP200
ENSG00000173457	9689	7491	7412	8267	6919	6759	6033	5700	PPP1R14B
ENSG00000171863	10292	8745	6072	7645	6915	6341	6518	7005	RPS7
ENSG00000102024	7732	7875	3599	5183	6893	7051	7093	7037	PLS3
ENSG00000078369	7214	7485	8569	8113	6874	6645	6605	6654	GNB1
ENSG00000178952	8205	6849	8146	8672	6863	6706	6072	6699	TUFM
ENSG00000182199	10025	9129	11467	11749	6858	6426	8452	7217	SHMT2
ENSG00000141526	8312	8060	10408	10477	6852	6318	8566	6566	SLC16A3
ENSG00000135404	9431	7655	8086	8761	6833	6024	7882	6217	CD63
ENSG00000189091	6768	7194	11588	8592	6828	6466	6180	6909	SF3B3
ENSG00000089159	5186	5996	5778	5782	6824	6819	4889	5368	PXN
ENSG00000196419	7710	7056	6131	6429	6820	6580	5337	6055	XRCC6
ENSG00000205339	6347	7460	4161	5240	6771	7090	5772	7388	IPO7
ENSG00000108829	6298	6424	7595	5782	6763	7002	5253	5930	LRRC59
ENSG00000205937	7159	6811	6089	6685	6746	6514	6025	6463	RNPS1
ENSG00000146701	8100	6386	6328	7896	6737	6872	5775	6521	MDH2
ENSG00000187109	8339	7603	4423	6104	6727	6870	6381	7362	NAP1L1
ENSG00000112306	9934	8038	5551	7254	6691	6502	5802	6300	RPS12
ENSG00000138119	4453	6242	5775	5926	6680	6606	4867	6855	MYOF
ENSG00000130816	5492	6572	6546	6282	6660	6269	4403	5398	DNMT1
ENSG00000104408	7374	6793	3302	5076	6583	6934	6508	7597	EIF3E
ENSG00000125817	7358	6694	11038	8157	6577	6351	6347	5863	CENPB
ENSG00000169504	7394	7867	6105	7875	6559	7153	7408	8821	CLIC4
ENSG00000169045	6701	7388	3966	4277	6551	6660	5605	7162	HNRNPH1
ENSG00000008988	9839	7867	6633	7327	6529	5855	5851	5823	RPS20
ENSG00000130826	7350	6834	3254	4442	6494	6628	4010	5300	DKC1
ENSG00000185000	6200	5576	6528	5906	6484	6459	5672	5387	DGAT1
ENSG00000063245	6336	6077	8628	6597	6464	6258	5255	4833	EPN1
ENSG00000147162	5390	7273	1841	3726	6456	7065	6383	8978	OGT
ENSG00000123562	8025	7942	5066	7023	6455	6501	8110	7837	MORF4L2
ENSG00000198755	8846	7398	8611	8092	6443	6133	6712	6934	RPL10A
ENSG00000118181	9914	8289	6301	7785	6423	5838	6757	6709	RPS25
ENSG00000026025	7624	6557	7022	7121	6423	7362	6717	7219	VIM
ENSG00000107984	7549	6692	4135	7621	6415	7087	6014	7662	DKK1
ENSG00000115484	7370	6403	6819	6601	6413	6608	6156	7043	CCT4
ENSG00000170027	5833	6351	6029	6216	6409	5939	5582	6525	YWHAG
ENSG00000179010	8049	6772	6880	6539	6390	6429	6538	6441	MRFAP1
ENSG00000155660	6009	5704	6582	8443	6338	6269	8161	7653	PDIA4
ENSG00000100097	8550	7099	7780	9593	6321	5553	8841	6454	LGALS1
ENSG00000082153	8071	8026	3816	5403	6315	7100	5599	6468	BZW1
ENSG00000143621	7073	6444	4715	5703	6307	6309	5163	5981	ILF2
ENSG00000101182	7734	6185	5420	6036	6298	5832	5429	5058	PSMA7
ENSG00000163430	6673	6672	7803	8197	6292	6682	8910	9017	FSTL1
ENSG00000030582	5392	4797	4313	6482	6289	5784	5820	5398	GRN
ENSG00000115310	6403	6246	4990	6438	6285	6076	5657	6412	RTN4
ENSG00000139289	6890	6722	4824	6821	6281	7578	7032	8025	PHLDA1
ENSG00000115738	768	638	226	474	6274	5284	3376	4680	ID2
ENSG00000185825	8313	6899	8005	7849	6274	6380	6040	5967	BCAP31
ENSG00000171490	6962	6725	3931	4510	6271	6099	5212	6328	RSL1D1
ENSG00000204469	4570	5936	10932	8816	6265	5663	5880	6241	PRRC2A
ENSG00000197157	5411	5466	9269	6350	6257	5863	5807	5555	SND1
ENSG00000184007	7751	7185	5442	5540	6256	6396	5746	6250	PTP4A2
ENSG00000182899	9073	7288	5549	7518	6225	5107	6163	5595	RPL35A
ENSG00000176619	5234	5683	7102	6252	6217	5799	5242	5475	LMNB2
ENSG00000116459	7475	6708	4794	5819	6202	6268	5396	6488	ATP5PB
ENSG00000013306	7726	7060	7563	8128	6200	5779	6036	5721	SLC25A39
ENSG00000072778	6238	5870	5481	6195	6198	5928	6039	5592	ACADVL
ENSG00000184575	6583	6910	4373	5477	6182	6328	5705	7067	XPOT
ENSG00000145592	10031	7903	7023	7518	6176	4201	7188	6409	RPL37
ENSG00000142627	5953	5973	6736	7770	6142	6093	5351	5288	EPHA2
ENSG00000197756	10798	7807	6487	7319	6139	4035	6664	6510	RPL37A
ENSG00000112081	7560	6557	4026	5172	6137	6217	5028	5957	SRSF3
ENSG00000135387	4908	5463	4893	4870	6116	6121	5521	6402	CAPRIN1
ENSG00000188157	5615	6157	9879	9238	6093	5672	6696	5737	AGRN
ENSG00000122218	4421	5642	7312	5913	6066	5909	5654	6612	COPA
ENSG00000126777	4996	6461	2728	2462	6041	6616	6851	8083	KTN1
ENSG00000125166	5840	5908	6593	6025	6024	5993	4435	5579	GOT2
ENSG00000196305	5381	5986	5673	5311	6022	6244	4952	6718	IARS
ENSG00000129250	6331	6703	11043	7759	6019	5824	5072	5423	KIF1C
ENSG00000169714	7126	6819	3805	4793	6017	6016	5324	5453	CNBP
ENSG00000147649	5505	5788	3139	3938	6011	6868	4312	6763	MTDH
ENSG00000215301	5153	5703	3092	3637	6001	6047	4096	5442	DDX3X
ENSG00000170144	7224	7068	3615	4882	5993	6053	5611	6377	HNRNPA3
ENSG00000165280	5817	5596	7321	6214	5989	5747	5059	5445	VCP
ENSG00000058262	5437	5564	8006	6354	5975	5856	5468	5784	SEC61A1
ENSG00000105568	6388	6046	7744	6869	5961	5834	5133	5044	PPP2R1A
ENSG00000175592	5815	5887	6008	6481	5951	5801	5774	6141	FOSL1
ENSG00000138095	5708	6043	2992	3958	5945	6406	4389	6232	LRPPRC
ENSG00000065054	6697	5642	6205	6731	5926	5905	6009	5355	SLC9A3R2
ENSG00000196562	4127	4887	5328	5562	5917	5465	6533	5637	SULF2
ENSG00000213719	7138	5836	5988	5913	5908	5925	5827	5185	CLIC1
ENSG00000149136	6240	6097	7362	6042	5881	5694	4550	5338	SSRP1
ENSG00000138071	6205	6714	4149	5230	5859	5615	5713	6548	ACTR2
ENSG00000101150	5647	5649	5274	5776	5853	5486	5165	5588	TPD52L2
ENSG00000166508	6158	6074	6352	6026	5837	5458	4305	4869	MCM7
ENSG00000101361	6175	5909	3526	4515	5826	5704	3862	5430	NOP56
ENSG00000086061	6214	5670	3224	4259	5825	5532	5457	6469	DNAJA1
ENSG00000074695	5284	5813	3816	4796	5824	6038	6841	8079	LMAN1
ENSG00000196352	5127	4987	3340	4341	5807	5572	7907	6581	CD55
ENSG00000166197	5787	6038	4242	4571	5805	5549	4317	5115	NOLC1
ENSG00000142676	9210	7968	6839	6861	5781	5347	6855	6352	RPL11
ENSG00000156261	6507	5770	2849	4153	5771	5709	4987	6367	CCT8
ENSG00000115756	6316	5508	6977	6290	5740	5699	6214	5474	HPCAL1
ENSG00000041982	3268	5006	6606	5445	5740	5149	4402	5126	TNC
ENSG00000155506	4372	5657	6895	5990	5732	5457	4511	5457	LARP1
ENSG00000010256	6872	5629	8991	6618	5724	5370	5118	5251	UQCRC1
ENSG00000115306	4083	6288	6688	6156	5721	5343	4402	5452	SPTBN1
ENSG00000170421	5568	5177	6244	4792	5709	5310	5491	4422	KRT8
ENSG00000072110	4115	5066	6966	5963	5706	5432	5301	5459	ACTN1
ENSG00000008441	5091	6990	11984	8600	5701	5209	4763	4826	NFIX
ENSG00000164889	4439	4921	4301	4109	5676	5322	3169	3521	SLC4A2
ENSG00000197728	8155	6260	4544	6348	5674	5460	4724	5534	RPS26
ENSG00000086758	2900	4971	9052	6097	5669	4970	3993	5604	HUWE1
ENSG00000168003	5286	4496	3871	4686	5656	5783	3986	4775	SLC3A2
ENSG00000063046	7033	6877	7120	7802	5653	5911	6012	6192	EIF4B
ENSG00000134294	5254	5837	2523	4023	5646	5987	4786	6504	SLC38A2
ENSG00000196531	7908	6872	3542	4913	5629	6071	5672	6131	NACA
ENSG00000131143	7389	5718	4759	6337	5625	5145	5018	5050	COX4I1
ENSG00000159184	8779	8492	12970	11973	5616	5300	6938	5779	HOXB13
ENSG00000172115	6746	6081	2809	4155	5613	5428	5170	6053	CYCS
ENSG00000142669	7907	6954	5184	8503	5596	5528	6845	5409	SH3BGRL3
ENSG00000113407	5811	5790	2996	3695	5569	5830	4658	5425	TARS
ENSG00000037474	5350	5264	3249	3966	5557	5662	3526	4868	NSUN2
ENSG00000233276	7034	5738	5593	7310	5556	4929	5923	4846	GPX1
ENSG00000088832	6568	5662	4884	5485	5539	5788	5707	5827	FKBP1A
ENSG00000100644	5712	6430	3160	4236	5532	6077	6257	6893	HIF1A
ENSG00000060138	4556	4253	5870	4880	5514	5642	4946	5750	YBX3
ENSG00000152558	6711	6913	3145	5056	5493	5709	6153	6708	TMEM123
ENSG00000168385	4176	4128	2023	3055	5493	5888	5323	5741	2023-09-02
ENSG00000132382	3683	4496	5839	4303	5482	5011	3186	4156	MYBBP1A
ENSG00000197694	3880	5011	8307	5818	5465	4993	3907	4710	SPTAN1
ENSG00000090861	4505	4595	7582	6185	5464	5034	5226	5463	AARS
ENSG00000114353	5562	5120	6526	6262	5463	5248	5739	5309	GNAI2
ENSG00000125968	5399	4251	2231	4091	5462	5604	3696	5099	ID1
ENSG00000145907	5234	5625	4450	5099	5461	5541	5105	6178	G3BP1
ENSG00000114850	5444	5172	3974	4376	5459	5622	4858	6130	SSR3
ENSG00000170606	5727	5491	3517	4157	5459	5376	4940	6075	HSPA4
ENSG00000070087	5523	5352	4512	5000	5456	5560	6177	6183	PFN2
ENSG00000166710	6285	5197	2258	4738	5442	5383	7564	6160	B2M
ENSG00000148248	5511	5125	8293	6875	5436	5353	5899	5994	SURF4
ENSG00000167775	6678	5174	4971	6234	5436	5110	5272	4722	CD320
ENSG00000103342	5752	5641	5080	4835	5434	5796	4755	5859	GSPT1
ENSG00000100504	6460	5995	6449	6567	5399	5251	7006	6504	PYGL
ENSG00000082898	5568	5780	2788	3876	5385	5776	4515	6479	XPO1
ENSG00000085063	6755	6153	6471	7063	5367	5391	7578	6733	CD59
ENSG00000147676	7028	6871	4089	4909	5354	5766	5022	5288	MAL2
ENSG00000235173	5180	5062	7419	5814	5339	5277	3739	4701	HGH1
ENSG00000168066	4440	4792	5087	4936	5334	5298	3661	4576	SF1
ENSG00000136238	6381	5191	5092	4778	5333	5531	5400	5483	RAC1
ENSG00000160877	5594	5971	8503	6525	5332	4904	4434	4335	NACC1
ENSG00000169100	6716	5828	9310	7677	5329	4822	4803	4410	SLC25A6
ENSG00000135316	5706	6219	3066	3802	5329	5726	3934	5284	SYNCRIP
ENSG00000116478	6359	6113	5018	5940	5324	5128	5017	4929	HDAC1
ENSG00000089737	4587	5015	5036	4400	5310	4828	5047	4825	DDX24
ENSG00000198918	10044	7818	6768	7029	5307	4500	6777	5805	RPL39
ENSG00000182180	6044	5334	5829	6169	5286	5045	4924	5031	MRPS16
ENSG00000107581	4425	5332	2979	3362	5276	5077	4313	5232	EIF3A
ENSG00000070814	4394	5127	6973	5138	5261	4692	4013	4374	TCOF1
ENSG00000065427	5653	5543	5674	5003	5250	5056	4780	5065	KARS
ENSG00000181222	3015	4610	5447	4326	5250	4780	2899	3977	POLR2A
ENSG00000105976	4723	5257	4868	4759	5208	5614	4733	6744	MET
ENSG00000116285	5924	5924	4058	5775	5205	5417	6636	6314	ERRFI1
ENSG00000215021	5998	5216	4961	6003	5194	4949	4197	4940	PHB2
ENSG00000248527	6999	6403	6015	5018	5163	2786	5783	5462	MTATP6P1
ENSG00000107404	5653	5553	7751	6125	5147	4829	4952	4522	DVL1
ENSG00000213585	6051	5764	4635	5770	5146	4932	5201	5544	VDAC1
ENSG00000110700	7822	6099	5495	5860	5134	4509	4818	5254	RPS13
ENSG00000067057	4360	4815	6486	5974	5129	4740	5609	4953	PFKP
ENSG00000182944	5047	5047	3606	4222	5121	4815	3867	4407	EWSR1
ENSG00000170515	5941	5398	4375	4741	5119	5424	3925	4761	PA2G4
ENSG00000101444	5140	4982	7661	6093	5113	5222	4090	4836	AHCY
ENSG00000084623	6198	5342	7286	5996	5094	4784	4655	4872	EIF3I
ENSG00000106153	6813	5641	4768	5521	5082	4653	4330	4485	CHCHD2
ENSG00000126602	5328	5241	7199	6187	5061	4885	4167	4794	TRAP1
ENSG00000105323	4749	5750	5953	5727	5061	4516	3915	4328	HNRNPUL1
ENSG00000159335	7360	5873	5164	6651	5057	4399	5681	4844	PTMS
ENSG00000108883	4791	4875	6371	4830	5047	4799	3868	4501	EFTUD2
ENSG00000102317	5999	5589	3789	3376	5045	4796	2534	3325	RBM3
ENSG00000170315	4703	4204	3539	4392	5036	4619	4555	3981	UBB
ENSG00000115524	5341	5600	2837	3800	5032	5274	4696	5769	SF3B1
ENSG00000132002	4819	4512	7048	5980	5027	4783	5699	6090	DNAJB1
ENSG00000090273	5645	4549	5187	4310	5014	4727	4343	4332	NUDC
ENSG00000164111	5204	4699	5042	5247	5011	4922	6296	5532	ANXA5
ENSG00000149806	7184	5643	5933	5676	4998	4668	4373	4271	FAU
ENSG00000196498	3247	4718	7667	5469	4995	4394	4570	4341	NCOR2
ENSG00000026508	4325	4474	5108	4999	4989	5312	5254	5807	CD44
ENSG00000182481	5674	5349	4550	4779	4971	5239	4591	5813	KPNA2
ENSG00000177697	5182	4326	4468	4862	4959	4747	4827	4135	CD151
ENSG00000004455	5978	5783	5467	5237	4956	4480	4746	4749	AK2
ENSG00000089154	3709	5036	10364	6496	4943	4601	4449	5038	GCN1
ENSG00000165678	5718	5135	3681	4360	4938	4623	4199	4617	GHITM
ENSG00000147274	5722	5343	3991	4283	4934	5075	4048	4690	RBMX
ENSG00000005007	3775	4222	6004	5153	4926	4372	3860	3911	UPF1
ENSG00000105063	4085	4550	6253	4595	4924	4700	3928	3810	PPP6R1
ENSG00000179115	4924	4600	5114	4866	4907	4593	4012	3741	FARSA
ENSG00000108175	3434	5316	6297	5947	4906	4526	4272	4478	ZMIZ1
ENSG00000177954	8692	6794	4090	5945	4903	3194	4767	4215	RPS27
ENSG00000088325	4813	4825	5297	4945	4903	4897	4277	5321	TPX2
ENSG00000171867	4638	4314	3023	4016	4892	5011	4664	5494	PRNP
ENSG00000168268	6129	5878	8246	8088	4882	4932	4396	4889	NT5DC2
ENSG00000164163	4593	4753	1979	2849	4866	5373	3771	5405	ABCE1
ENSG00000134440	5115	5134	2286	3406	4863	5198	4400	5194	NARS
ENSG00000171345	5702	4686	7069	5754	4859	4839	6974	4446	KRT19
ENSG00000135829	4459	4757	3317	3494	4831	4684	3679	4804	DHX9
ENSG00000078808	5574	4630	4512	5683	4807	4859	4929	4535	SDF4
ENSG00000105701	6130	5115	7338	6901	4802	4577	6141	4474	FKBP8
ENSG00000161011	3454	3391	4152	3908	4791	4689	3941	4283	SQSTM1
ENSG00000168036	4871	4807	5566	4339	4787	4768	4612	5003	CTNNB1
ENSG00000277586	4690	4278	3828	3621	4787	4946	4054	4571	NEFL
ENSG00000089685	5089	4423	5723	5058	4777	4551	4609	4739	BIRC5
ENSG00000170275	4702	4753	8434	6741	4764	4572	5226	5029	CRTAP
ENSG00000120742	4963	4449	4053	4776	4753	4717	5150	5501	SERP1
ENSG00000116489	4707	4943	3477	3213	4735	4696	4939	5081	CAPZA1
ENSG00000008394	5352	4433	2716	3838	4712	4730	4257	5508	MGST1
ENSG00000156471	4611	4539	4421	4057	4710	4689	2997	4132	PTDSS1
ENSG00000197747	6502	4946	3427	5938	4704	4378	6124	4974	S100A10
ENSG00000143641	3392	3530	4903	4961	4703	4684	5028	5174	GALNT2
ENSG00000004478	4983	4690	7395	6318	4695	4660	5186	5394	FKBP4
ENSG00000187555	4919	5192	4196	4236	4691	4853	3966	4809	USP7
ENSG00000116649	4823	3959	4117	4421	4690	4645	3449	4184	SRM
ENSG00000138668	5238	4680	3793	4027	4682	4262	3591	4026	HNRNPD
ENSG00000124422	3692	4413	7009	5328	4679	4695	3649	4516	USP22
ENSG00000125505	3640	3557	4697	4481	4665	4462	4966	4637	MBOAT7
ENSG00000006125	4339	5099	7211	6055	4661	4517	4067	5010	AP2B1
ENSG00000100591	5088	4313	3521	4796	4657	4324	4429	5115	AHSA1
ENSG00000125835	5133	3966	2279	3838	4647	4264	2983	3497	SNRPB
ENSG00000125970	4758	4346	5393	5058	4643	4443	4375	4327	RALY
ENSG00000079332	4923	4882	4566	3521	4639	4599	5355	5137	SAR1A
ENSG00000140740	5016	4986	3520	4304	4632	4643	4101	4903	UQCRC2
ENSG00000110651	5324	4475	5191	6074	4630	4791	5359	4493	CD81
ENSG00000167004	5358	4761	3411	4824	4625	4923	5406	5319	PDIA3
ENSG00000159140	3289	4181	4258	3707	4624	4568	3200	4664	SON
ENSG00000087365	4512	4458	5957	4754	4619	4238	4065	4038	SF3B2
ENSG00000071054	3868	4663	4231	3659	4610	4522	3324	4300	MAP4K4
ENSG00000110880	4396	4661	4904	4432	4604	4519	4688	4697	CORO1C
ENSG00000164754	4808	4849	2894	3511	4600	4937	4124	4910	RAD21
ENSG00000104738	5106	4921	4651	4420	4585	4807	3315	4409	MCM4
ENSG00000198900	4278	5207	3234	3639	4574	4398	4087	4630	TOP1
ENSG00000091483	5298	4967	3231	4073	4574	4690	3753	4507	FH
ENSG00000073578	5036	4396	5076	5307	4569	4454	4348	4292	SDHA
ENSG00000167815	6286	5367	5095	6806	4565	4489	4446	4364	PRDX2
ENSG00000188976	4291	4161	5513	4253	4546	4272	3521	3651	NOC2L
ENSG00000185896	4083	3800	3692	4210	4530	4258	3330	3989	LAMP1
ENSG00000110917	3243	3697	5636	4527	4526	4684	4964	5185	MLEC
ENSG00000122565	5340	5084	1749	3125	4520	4666	4114	4992	CBX3
ENSG00000147677	5576	4931	4026	4301	4517	4642	4749	4826	EIF3H
ENSG00000100811	4237	4499	3565	3735	4515	4348	3704	4173	YY1
ENSG00000121774	4744	4647	4002	4480	4502	4511	4026	4387	KHDRBS1
ENSG00000159377	5433	4435	3615	4388	4486	4416	3916	4084	PSMB4
ENSG00000126247	4994	4344	4505	4858	4484	4253	4197	4123	CAPNS1
ENSG00000127184	6972	5536	3017	5425	4477	3590	4559	4276	COX7C
ENSG00000048828	3838	4222	4433	4713	4475	4441	4246	5357	FAM120A
ENSG00000067182	4842	4425	5242	5029	4472	4340	4393	4177	TNFRSF1A
ENSG00000172534	2791	3910	5197	4495	4470	4085	2314	3271	HCFC1
ENSG00000169180	3784	4081	4789	4610	4469	4311	3405	4061	XPO6
ENSG00000181649	5087	3755	2898	4982	4466	4382	4091	4377	PHLDA2
ENSG00000119318	4641	4755	3522	4008	4463	4172	3792	4375	RAD23B
ENSG00000173812	5438	4271	2643	4546	4462	4501	3538	4375	EIF1
ENSG00000100813	3813	4290	3188	3507	4454	4078	3598	4014	ACIN1
ENSG00000101856	5091	4506	3127	3964	4449	4532	4410	4551	PGRMC1
ENSG00000133706	4411	4962	4022	4256	4429	4676	4889	5573	LARS
ENSG00000100714	3836	4280	4160	4013	4423	4544	3348	4321	MTHFD1
ENSG00000109861	4624	4289	2728	3589	4422	4560	3718	4101	CTSC
ENSG00000143870	4637	4586	4088	4516	4420	4577	4785	4929	PDIA6
ENSG00000131016	4759	6199	6683	6524	4419	4367	5971	5708	AKAP12
ENSG00000131504	3636	4545	5409	4256	4417	4332	3128	3838	DIAPH1
ENSG00000148606	2944	3653	5585	4358	4416	4412	4121	4783	POLR3A
ENSG00000110107	4184	4142	3843	4035	4403	4189	3144	3543	PRPF19
ENSG00000100823	5139	4683	4279	4833	4402	4156	4005	4405	APEX1
ENSG00000149428	3688	3862	5355	5149	4401	4257	3788	4442	HYOU1
ENSG00000130204	4395	4125	3741	3519	4390	4021	2635	3232	TOMM40
ENSG00000136026	4212	3673	6901	5816	4379	4208	5206	5296	CKAP4
ENSG00000175216	3789	4684	4837	4485	4378	4523	4360	5209	CKAP5
ENSG00000128591	2173	3224	7227	4590	4377	4009	3166	3870	FLNC
ENSG00000114942	6220	5169	4552	5061	4373	4279	3599	3984	EEF1B2
ENSG00000101057	4533	4246	5254	3986	4371	4162	3161	3472	MYBL2
ENSG00000185009	3967	4519	3363	4210	4355	4490	4635	6056	AP3M1
ENSG00000130520	5844	4743	4811	5935	4352	3995	4605	4105	LSM4
ENSG00000126461	3984	3964	6114	5107	4348	4142	4249	3892	SCAF1
ENSG00000049656	3908	3544	4613	4364	4342	4471	4006	4458	CLPTM1L
ENSG00000170348	4330	3989	3622	4294	4328	4372	4575	5227	TMED10
ENSG00000179051	4169	4434	4519	4851	4325	3966	3535	4062	RCC2
ENSG00000156482	5485	5020	4272	4856	4322	3458	4320	3639	RPL30
ENSG00000092841	5153	4053	3565	4513	4312	3863	4493	3923	MYL6
ENSG00000113719	4465	4793	6727	5773	4305	4260	4742	4869	ERGIC1
ENSG00000167491	3815	4294	3952	4181	4298	3889	2996	3398	GATAD2A
ENSG00000260032	4524	4935	4179	4755	4295	4570	4812	5162	NORAD
ENSG00000091136	3014	3494	2898	3220	4288	4187	4082	4684	LAMB1
ENSG00000172354	4841	4047	5058	4876	4284	4111	3862	3567	GNB2
ENSG00000167085	5118	4562	4599	4610	4280	4388	3553	3882	PHB
ENSG00000143569	3410	4415	4534	4506	4279	4142	3647	4018	UBAP2L
ENSG00000125868	5350	4455	3271	4053	4269	4376	4318	4560	DSTN
ENSG00000146223	4800	4915	3935	4107	4266	4311	3528	4107	RPL7L1
ENSG00000164733	3479	3301	3992	4789	4263	4153	5786	4814	CTSB
ENSG00000178896	5662	4292	3617	4456	4260	4555	3581	3360	EXOSC4
ENSG00000152601	3232	3641	1509	2257	4260	4660	3136	4581	MBNL1
ENSG00000113712	4232	4358	3799	4285	4244	4302	3947	4789	CSNK1A1
ENSG00000180817	5178	4523	2789	3508	4222	4349	4090	4515	PPA1
ENSG00000009335	3630	3937	3993	4123	4217	4139	3578	4374	UBE3C
ENSG00000074410	3710	4248	4753	4719	4214	4044	5342	5148	CA12
ENSG00000168374	4524	3877	3505	4080	4186	4356	4375	4709	ARF4
ENSG00000101294	3704	3502	3845	3839	4183	4006	3440	3739	HM13
ENSG00000116221	4855	4264	6309	5067	4170	4118	3949	3867	MRPL37
ENSG00000125107	2815	4251	4417	3936	4151	4044	3319	4306	CNOT1
ENSG00000170004	4008	4914	8486	5464	4143	3955	3823	3970	CHD3
ENSG00000134363	5205	4443	4988	4823	4128	4454	4977	4897	FST
ENSG00000175130	6221	5112	4427	5338	4127	3748	4215	3927	MARCKSL1
ENSG00000099331	2721	3425	5329	3954	4127	3852	3645	3569	MYO9B
ENSG00000074071	5287	4158	4809	4593	4109	3819	3273	3458	MRPS34
ENSG00000166986	3668	3737	4643	4137	4102	4097	3367	4122	MARS
ENSG00000179950	4379	4025	4708	4459	4085	3832	3240	3472	PUF60
ENSG00000134001	4294	4096	2494	2970	4081	4443	3403	4153	EIF2S1
ENSG00000104341	5466	4763	5419	4984	4076	4128	4369	4294	LAPTM4B
ENSG00000178035	4619	4075	6455	5002	4068	3929	4030	4330	IMPDH2
ENSG00000143612	4902	4342	4374	4661	4067	4076	4128	4229	C1orf43
ENSG00000125977	4465	3759	1623	2508	4067	4081	3911	4347	EIF2S2
ENSG00000104852	4394	3798	3303	3991	4062	3752	3362	3401	SNRNP70
ENSG00000006327	3597	3310	2132	3556	4060	3748	3150	3067	TNFRSF12A
ENSG00000169223	4639	3809	4843	5283	4050	3828	4296	4055	LMAN2
ENSG00000197081	2403	3557	5731	4991	4048	3517	3354	4243	IGF2R
ENSG00000125844	2414	2850	5091	3455	4042	3559	4306	3748	RRBP1
ENSG00000131469	6352	5257	5160	5578	4041	4028	4225	4191	RPL27
ENSG00000143384	4365	4399	4129	4897	4040	4386	4509	5252	MCL1
ENSG00000244038	3964	3827	3427	4390	4036	4047	3696	3829	DDOST
ENSG00000085733	3762	3911	3373	3271	4033	3943	3884	3867	CTTN
ENSG00000142208	3130	3199	4079	3828	4033	3793	3688	3557	AKT1
ENSG00000172809	6557	5019	4645	4556	4028	2494	4259	3578	RPL38
ENSG00000181019	3970	3563	3117	3190	4027	3988	2725	3668	NQO1
ENSG00000167792	5175	4224	4947	5029	4019	3780	3743	3720	NDUFV1
ENSG00000124193	3912	3670	2335	2525	4015	4136	2956	3888	SRSF6
ENSG00000198836	3639	4202	1719	2062	4007	4243	3117	4563	OPA1
ENSG00000100029	4372	3895	4158	3516	4003	3687	2782	3029	PES1
ENSG00000113758	4570	4452	5484	4719	4001	3731	3634	3176	DBN1
ENSG00000175745	4994	5243	5641	7900	3991	4313	6207	5809	NR2F1
ENSG00000100401	3855	3502	5106	3900	3988	3836	3336	3316	RANGAP1
ENSG00000135018	3479	3640	2535	3308	3985	4055	3511	4610	UBQLN1
ENSG00000115241	4362	3922	4674	3965	3985	3695	3359	3326	PPM1G
ENSG00000135919	4537	4163	3639	4501	3979	4019	5195	4292	SERPINE2
ENSG00000163902	3899	3714	4392	3909	3977	3712	3662	3808	RPN1
ENSG00000132463	4561	4256	3099	3594	3970	4064	3639	4317	GRSF1
ENSG00000122884	4745	4537	3587	5389	3961	4129	7083	6689	P4HA1
ENSG00000165527	4449	4554	3928	4343	3960	3719	3995	4028	ARF6
ENSG00000084754	4280	4146	5433	4520	3955	4005	3787	4000	HADHA
ENSG00000184432	4274	4260	3458	3825	3951	4026	4895	4598	COPB2
ENSG00000018408	4601	4565	3354	4661	3948	4225	3769	4644	WWTR1
ENSG00000145730	4009	3964	3894	4727	3943	4097	5149	5298	PAM
ENSG00000143774	5290	4611	4591	5509	3940	3784	4701	3608	GUK1
ENSG00000101224	4094	3882	5976	5135	3940	3904	3959	4329	CDC25B
ENSG00000115091	4632	4425	2618	3293	3940	4201	3974	4347	ACTR3
ENSG00000164237	3880	4059	4353	4132	3939	3697	3344	3967	CMBL
ENSG00000182095	3245	3945	6645	5023	3937	3518	3079	3248	TNRC18
ENSG00000105887	4049	4169	3802	4396	3925	4149	3904	4517	MTPN
ENSG00000079805	3264	3807	5347	4048	3924	3493	3650	3231	DNM2
ENSG00000136527	4372	4274	2193	3378	3909	3970	3086	4205	TRA2B
ENSG00000158417	4607	4754	2819	1950	3903	3753	4751	4296	EIF5B
ENSG00000130741	3911	4014	3832	3389	3895	3974	3684	4476	EIF2S3
ENSG00000163814	2889	3782	4955	4307	3895	3757	4284	4338	CDCP1
ENSG00000131051	4121	4174	1573	2791	3892	4225	4038	4639	RBM39
ENSG00000143742	5292	4681	2399	3519	3879	4095	4436	4827	SRP9
ENSG00000136938	5316	4462	3453	4339	3875	3738	3672	3985	ANP32B
ENSG00000106397	3700	3509	5322	5598	3870	3808	4382	4273	PLOD3
ENSG00000023734	4454	3770	2966	3558	3869	4069	3275	4148	STRAP
ENSG00000111057	4846	4068	4841	3651	3864	3879	2940	3297	KRT18
ENSG00000132383	3998	3948	3859	4076	3860	3989	3587	4170	RPA1
ENSG00000130725	4241	3694	4444	3989	3857	3545	3487	3080	UBE2M
ENSG00000184232	3856	3594	4042	4332	3856	3785	4310	3796	OAF
ENSG00000101972	3736	4391	1846	2140	3852	3992	3404	4333	STAG2
ENSG00000067704	4470	4129	2876	3674	3845	4049	3431	4015	IARS2
ENSG00000065000	3359	3859	5280	4108	3841	3832	3415	3510	AP3D1
ENSG00000184840	4020	3415	3184	4230	3841	3515	3705	3517	TMED9
ENSG00000128595	3442	3520	3172	4086	3839	3783	4835	5101	CALU
ENSG00000108100	4467	4382	4356	4637	3838	3772	3768	3591	CCNY
ENSG00000089693	4163	3629	3689	3913	3837	3584	3637	3323	MLF2
ENSG00000064393	2478	3658	4490	4054	3837	3671	3014	3993	HIPK2
ENSG00000183207	4362	3745	5256	4344	3835	3487	3603	3472	RUVBL2
ENSG00000183684	4973	4130	5076	4238	3835	3465	3288	3268	ALYREF
ENSG00000101439	4713	3439	1799	4769	3834	3624	3906	3778	CST3
ENSG00000182670	3632	4699	2784	3093	3821	4218	4760	5308	TTC3
ENSG00000163527	3709	3918	2951	3463	3816	4094	3807	4732	STT3B
ENSG00000188486	3792	3234	3045	3302	3812	3665	2771	3132	H2AFX
ENSG00000125944	4689	4512	2237	3198	3811	3791	3176	3694	HNRNPR
ENSG00000153395	3207	3298	5033	4378	3810	3783	4854	4456	LPCAT1
ENSG00000116688	3328	3924	4369	3920	3807	3718	2920	3424	MFN2
ENSG00000140391	4034	3536	2740	3328	3806	3845	3933	3792	TSPAN3
ENSG00000065183	3563	3719	2284	2877	3806	3952	3011	3890	WDR3
ENSG00000155096	4132	4007	3452	4598	3803	4074	4530	5326	AZIN1
ENSG00000179526	4309	3733	4981	4822	3797	3585	4363	3474	SHARPIN
ENSG00000134686	3792	3814	3718	3970	3796	3629	3469	3056	PHC2
ENSG00000101367	3916	3934	2962	3526	3794	3940	3386	3895	MAPRE1
ENSG00000124155	4123	3843	4585	5673	3790	3759	3843	3986	PIGT
ENSG00000179295	3245	3914	2656	3034	3789	3721	3199	4019	PTPN11
ENSG00000179832	2934	3163	4521	3680	3780	3809	3581	3932	MROH1
ENSG00000203485	3312	3376	5681	4314	3779	3628	3648	3728	INF2
ENSG00000204394	3231	3328	5993	3873	3772	3703	2727	3168	VARS
ENSG00000187608	4674	3334	2641	2342	3759	2852	4100	2928	ISG15
ENSG00000160211	3368	3487	5237	4495	3755	3691	3794	3723	G6PD
ENSG00000136240	4267	3765	4052	4042	3749	3802	4161	4197	KDELR2
ENSG00000183291	4204	3837	1531	2677	3747	3996	3634	3902	SELENOF
ENSG00000143933	4755	4346	2299	3358	3742	3793	3846	4282	CALM2
ENSG00000135535	5049	5001	2513	3863	3741	3875	4212	4351	CD164
ENSG00000164091	3684	4141	4399	4352	3740	3560	3129	3670	WDR82
ENSG00000126432	5215	4249	3980	4767	3731	3216	4482	2845	PRDX5
ENSG00000177283	5179	4871	7288	8075	3729	3699	6128	4590	FZD8
ENSG00000100650	4122	3710	737	2167	3728	3647	3317	3673	SRSF5
ENSG00000196557	3432	3914	9054	6542	3721	3538	4461	4391	CACNA1H
ENSG00000132153	3375	3400	4070	3660	3717	3582	2755	3111	DHX30
ENSG00000132646	4350	3749	2033	2980	3716	3672	2954	3701	PCNA
ENSG00000125912	3608	3109	4284	3781	3715	3579	2802	2865	NCLN
ENSG00000124767	4390	4343	2797	3756	3712	3534	4014	4217	GLO1
ENSG00000103260	5450	4336	6012	6587	3707	3513	4713	3602	METRN
ENSG00000071626	3999	3823	3809	3934	3705	3439	3195	3255	DAZAP1
ENSG00000169230	4844	3924	4178	4496	3703	3544	2954	3068	PRELID1
ENSG00000162337	3075	3416	7607	6402	3701	3532	5217	4942	LRP5
ENSG00000136810	4835	4018	2087	3171	3698	3517	3512	3892	TXN
ENSG00000175550	4742	3812	3868	4193	3695	3081	3804	2852	DRAP1
ENSG00000134531	2766	2564	1924	2062	3693	3690	2823	3196	EMP1
ENSG00000156110	4336	3752	2485	3204	3691	3828	3345	3891	ADK
ENSG00000145741	5645	4547	3471	4202	3689	3714	3779	3825	BTF3
ENSG00000186298	4232	3951	2736	3323	3670	3845	3300	4124	PPP1CC
ENSG00000083312	3443	3971	2147	2856	3670	3947	2663	4483	TNPO1
ENSG00000198176	3951	3500	2457	3251	3670	3670	2848	3457	TFDP1
ENSG00000149100	4189	3804	1837	2577	3669	3991	3185	3662	EIF3M
ENSG00000120705	3949	3604	2371	2545	3666	3610	2695	3331	ETF1
ENSG00000130723	2045	3473	8776	5441	3662	3320	3591	3850	PRRC2B
ENSG00000100804	4210	3533	2844	3500	3660	3477	3244	3201	PSMB5
ENSG00000163041	4847	4391	3442	4192	3659	3450	3855	3734	H3F3A
ENSG00000089220	4612	4153	3699	4127	3656	3605	3209	3478	PEBP1
ENSG00000108312	3518	3532	4151	3942	3655	3358	2968	3365	UBTF
ENSG00000204463	2903	3265	5291	4235	3654	3456	3055	3248	BAG6
ENSG00000129514	3822	4136	3646	4218	3631	3652	3344	3467	FOXA1
ENSG00000165672	4262	3743	1511	2922	3629	3652	3207	3754	PRDX3
ENSG00000114416	3881	3987	2103	2653	3626	3672	4162	4618	FXR1
ENSG00000095319	2552	3154	4250	3589	3626	3410	2297	3332	NUP188
ENSG00000101187	4400	4793	6403	6100	3624	3570	4102	4035	SLCO4A1
ENSG00000151208	1519	2509	3675	2997	3623	3300	2805	3342	DLG5
ENSG00000101266	3214	3478	2828	3235	3622	3584	3308	3657	CSNK2A1
ENSG00000163655	3714	3640	3070	3033	3622	3545	3192	3802	GMPS
ENSG00000128272	4553	3717	1653	3068	3618	3696	2280	3189	ATF4
ENSG00000089053	3897	3782	3754	3613	3617	3835	3277	3768	ANAPC5
ENSG00000108094	3748	3907	1407	2371	3613	3957	3459	4248	CUL2
ENSG00000154380	3310	3696	2082	2581	3613	3618	3148	3879	ENAH
ENSG00000131747	3358	3932	1727	2474	3609	3629	3993	5079	TOP2A
ENSG00000127481	1691	3165	5881	3667	3607	3100	2454	3359	UBR4
ENSG00000152556	3476	3704	3262	3895	3605	3384	3236	3570	PFKM
ENSG00000096433	2277	3642	5922	4437	3603	3218	2857	3301	ITPR3
ENSG00000137409	3835	3421	3818	3981	3599	3519	3410	3521	MTCH1
ENSG00000164880	3437	3684	8409	4977	3595	3434	3038	3231	INTS1
ENSG00000137076	2601	3617	7823	5147	3591	3269	2930	3422	TLN1
ENSG00000167325	3527	3558	2190	2981	3591	3717	2957	3869	RRM1
ENSG00000074842	3964	3199	3201	3987	3583	3271	3982	3075	MYDGF
ENSG00000206053	3976	3686	4618	4169	3582	3684	3431	3724	JPT2
ENSG00000163191	4569	3574	2117	3789	3578	3467	4223	3776	S100A11
ENSG00000148773	2003	3744	4046	3131	3575	3181	2700	3801	MKI67
ENSG00000180879	4794	3951	4554	4608	3570	3174	3698	3281	SSR4
ENSG00000125991	3906	3315	4062	4301	3570	3338	3767	3470	ERGIC3
ENSG00000167522	2432	3482	3600	3297	3570	3423	2872	3178	ANKRD11
ENSG00000175334	4699	3778	2839	4461	3569	3442	3575	3511	BANF1
ENSG00000084090	4176	3881	3350	3690	3558	3668	2953	3684	STARD7
ENSG00000119383	3655	3266	6157	4095	3556	3320	3318	3202	PTPA
ENSG00000123144	4530	3753	3136	4046	3554	3157	3189	2923	TRIR
ENSG00000177733	4180	3743	3017	3864	3547	3414	3000	3131	HNRNPA0
ENSG00000123496	3065	2753	1090	1794	3544	3726	3371	3565	IL13RA2
ENSG00000104824	3445	3583	5163	3836	3539	3757	3051	3307	HNRNPL
ENSG00000103423	3629	3685	3430	3896	3537	3495	2975	3515	DNAJA3
ENSG00000100934	3564	3712	2981	3689	3536	3720	4065	4636	SEC23A
ENSG00000163714	3613	3891	1176	1758	3536	3676	3021	3811	U2SURP
ENSG00000131473	2615	3372	3699	3340	3532	3325	2560	3077	ACLY
ENSG00000057019	2695	3080	2075	2618	3530	3713	4145	4785	DCBLD2
ENSG00000164032	4758	3867	2077	3022	3527	3625	2767	3341	H2AFZ
ENSG00000140105	3228	3352	3928	3533	3512	3434	2906	3367	WARS
ENSG00000159399	3550	4248	4025	3885	3510	3336	3788	3913	HK2
ENSG00000071082	5142	4415	2874	3841	3508	2969	3822	3538	RPL31
ENSG00000196961	3274	3282	6542	4623	3508	3514	3844	3769	AP2A1
ENSG00000176986	2325	3147	5244	4090	3508	3448	3238	3564	SEC24C
ENSG00000155366	4405	3618	4087	4143	3504	3305	4493	3212	RHOC
ENSG00000189060	3591	3547	2995	3445	3498	3282	5170	3474	H1F0
ENSG00000126934	3561	3067	4541	3342	3496	3085	2883	2783	MAP2K2
ENSG00000197324	2918	3010	4997	4263	3495	3303	3867	3269	LRP10
ENSG00000092148	2128	2948	1816	1972	3491	3764	2952	3868	HECTD1
ENSG00000010165	3372	3067	3189	3160	3483	3495	2527	3003	METTL13
ENSG00000100380	4006	3551	2884	3288	3478	3347	3306	3769	ST13
ENSG00000142002	2932	3249	3922	3464	3471	3357	2520	2908	DPP9
ENSG00000197122	3091	3676	4468	4037	3467	3040	3357	3152	SRC
ENSG00000147889	4915	4031	3506	4687	3466	3210	3828	3123	CDKN2A
ENSG00000100353	3627	3400	4005	3590	3466	3513	3323	3334	EIF3D
ENSG00000171603	3406	3565	5027	4966	3463	3322	3467	3777	CLSTN1
ENSG00000001617	3608	3755	7011	5985	3461	3381	5433	3935	SEMA3F
ENSG00000142168	4347	3501	2301	3036	3461	3312	3230	3321	SOD1
ENSG00000111321	3561	3347	4101	3980	3459	3461	3291	3303	LTBR
ENSG00000183255	3436	3345	4094	4046	3459	3357	3809	3677	PTTG1IP
ENSG00000123143	3053	2730	6496	4069	3459	3318	3723	3329	PKN1
ENSG00000127884	4173	3387	3686	3804	3455	3593	3247	3129	ECHS1
ENSG00000145425	5707	4640	4755	5207	3449	3637	3951	3777	RPS3A
ENSG00000071894	2810	3085	3786	3472	3446	3298	2758	2976	CPSF1
ENSG00000134910	2949	3364	4127	3206	3445	3316	3381	3701	STT3A
ENSG00000091409	2946	3279	2809	2942	3443	3570	4241	4185	ITGA6
ENSG00000105974	3644	3398	2137	2998	3438	3622	3491	3880	CAV1
ENSG00000122026	5093	3980	3096	3361	3435	3178	3366	3601	RPL21
ENSG00000152332	3302	4090	2802	3670	3431	3684	3429	4709	UHMK1
ENSG00000106105	3376	3176	3381	2962	3428	3582	2836	3446	GARS
ENSG00000084774	2592	3161	5146	4096	3428	3104	2230	3244	CAD
ENSG00000104980	3475	3299	3206	2836	3427	3233	2254	2571	TIMM44
ENSG00000215182	2413	4360	7892	5871	3423	2709	3342	3494	MUC5AC
ENSG00000149480	3154	3358	4182	3010	3422	3270	2472	2804	MTA2
ENSG00000151929	3052	3059	3412	3612	3420	3380	3290	3674	BAG3
ENSG00000156976	3337	3289	1461	3526	3417	3772	5897	5888	EIF4A2
ENSG00000196141	3373	3620	2713	2876	3415	3166	3209	3434	SPATS2L
ENSG00000154518	4739	3688	2760	3518	3415	2747	2810	3116	ATP5MC3
ENSG00000174780	3316	3459	2111	2359	3413	3369	2578	3141	SRP72
ENSG00000134287	3246	3405	3952	3616	3410	3459	3171	3070	ARF3
ENSG00000124214	3548	3501	3428	3418	3410	3394	3087	3383	STAU1
ENSG00000178719	3852	3418	4397	4468	3408	3408	3755	3178	GRINA
ENSG00000168056	3399	3212	4862	4799	3406	3437	4773	3608	LTBP3
ENSG00000117399	3370	3020	3208	3624	3405	3294	2517	3296	CDC20
ENSG00000105953	2873	3066	4866	4035	3399	3296	2998	3418	OGDH
ENSG00000133318	3781	3364	4043	3926	3397	3505	3541	3985	RTN3
ENSG00000111530	3186	3514	2169	2685	3391	3489	3152	3732	CAND1
ENSG00000145495	3392	3668	2797	3466	3389	3560	3487	4346	2023-03-06
ENSG00000071564	3696	3624	4386	3788	3389	3309	2814	3000	TCF3
ENSG00000125691	5092	4222	4019	4099	3387	3069	3656	3661	RPL23
ENSG00000023191	3461	3141	3850	3906	3387	3281	3524	3312	RNH1
ENSG00000105281	2926	2793	4292	3437	3383	3479	2878	3097	SLC1A5
ENSG00000101346	2698	2892	4021	3501	3381	3167	2609	3286	POFUT1
ENSG00000087087	3144	3104	2954	2722	3381	3138	2238	2670	SRRT
ENSG00000180900	3200	2964	4982	4041	3373	3361	2801	3208	SCRIB
ENSG00000165733	2803	3012	1803	2053	3373	3304	2613	3219	BMS1
ENSG00000092621	4160	3611	5384	4715	3370	3294	3382	3573	PHGDH
ENSG00000167468	4139	3456	3271	4363	3367	2967	3574	3140	GPX4
ENSG00000214022	3863	3645	3787	4119	3358	3453	2767	3116	REPIN1
ENSG00000123136	4069	3362	2835	3024	3357	3511	1999	2649	DDX39A
ENSG00000134684	3216	3194	3484	3196	3356	3299	2711	3277	YARS
ENSG00000077235	2499	2944	5174	3262	3352	3115	2556	2832	GTF3C1
ENSG00000152291	2563	2978	2935	3120	3351	3316	2845	3507	TGOLN2
ENSG00000198561	2825	3458	3943	3617	3350	3126	2988	3614	CTNND1
ENSG00000058804	3295	3327	2221	2577	3349	3537	2576	3683	NDC1
ENSG00000116237	2958	2981	3770	3361	3347	3197	3072	3222	ICMT
ENSG00000173660	5133	3891	2976	3342	3346	2847	3204	3027	UQCRH
ENSG00000154330	2976	2978	5478	4291	3344	3289	3780	3834	PGM5
ENSG00000221867	4011	3573	2303	3347	3344	3358	2773	2889	MAGEA3
ENSG00000139921	3617	3384	1574	2338	3344	3252	2788	3596	TMX1
ENSG00000142634	3560	3070	3457	3452	3340	2825	2769	2723	EFHD2
ENSG00000072210	3510	3575	3401	3764	3335	3342	3230	3770	ALDH3A2
ENSG00000183431	3359	3381	2443	2454	3335	3255	2579	2867	SF3A3
ENSG00000133657	2876	3694	1855	2547	3334	3534	3037	4235	ATP13A3
ENSG00000161547	4137	3337	1718	2598	3333	3563	2351	3185	SRSF2
ENSG00000090621	3391	3227	3474	3380	3332	3606	2604	3349	PABPC4
ENSG00000100941	3379	3740	588	1329	3330	3598	3314	3933	PNN
ENSG00000130382	3123	3278	4455	3871	3325	3152	2973	3164	MLLT1
ENSG00000078618	3219	3546	2696	2952	3319	3517	3180	3650	NRDC
ENSG00000136930	3815	3425	3577	3025	3313	3130	2992	3000	PSMB7
ENSG00000101365	3642	3232	3247	2854	3313	3030	2539	2636	IDH3B
ENSG00000099817	3845	3435	3453	3698	3302	3235	2677	2619	POLR2E
ENSG00000173473	2610	3383	3550	3118	3297	3221	2418	2978	SMARCC1
ENSG00000115875	3868	3595	1989	2798	3293	3241	2884	3400	SRSF7
ENSG00000189159	4279	3489	3178	3696	3286	3014	3171	3007	JPT1
ENSG00000010292	2671	3405	4645	4367	3285	3150	3112	3811	NCAPD2
ENSG00000186432	3093	3175	1985	2247	3285	3378	2808	3420	KPNA4
ENSG00000141076	2902	3113	2279	2205	3285	3149	2064	2692	UTP4
ENSG00000136485	2934	3205	5199	4592	3281	3215	3718	3831	DCAF7
ENSG00000130811	4028	3355	3793	3674	3280	3239	3163	2880	EIF3G
ENSG00000276043	3069	3279	1904	2725	3280	2956	2287	2653	UHRF1
ENSG00000141522	3671	3684	4812	4322	3276	3237	2691	2703	ARHGDIA
ENSG00000119689	3092	3200	3307	3403	3276	3273	2895	3119	DLST
ENSG00000177731	2450	2812	4652	3198	3273	3258	2553	2863	FLII
ENSG00000114738	2828	2811	3347	3117	3268	3010	2496	2690	MAPKAPK3
ENSG00000179222	3019	2901	3830	3399	3266	3220	3502	3082	MAGED1
ENSG00000167615	2055	2854	1175	1946	3265	3268	3152	3781	LENG8
ENSG00000075785	3289	3309	2646	3057	3265	3053	3056	3004	RAB7A
ENSG00000126067	3383	2991	2476	2616	3265	3060	2359	2975	PSMB2
ENSG00000022840	3356	3315	4905	4386	3262	3348	3463	3353	RNF10
ENSG00000205531	3400	3376	2264	2881	3257	3279	3069	3385	NAP1L4
ENSG00000103335	2305	3075	4748	4069	3255	2790	2650	2834	PIEZO1
ENSG00000160209	3576	3396	4574	3989	3249	3183	3534	3185	PDXK
ENSG00000029153	3458	3343	2786	2902	3246	3535	3523	3921	ARNTL2
ENSG00000175756	4426	3353	3590	3858	3245	2813	2764	2748	AURKAIP1
ENSG00000163938	3634	3664	1130	2070	3245	3115	2847	3369	GNL3
ENSG00000140943	2991	3002	3601	3695	3243	3074	3240	3410	MBTPS1
ENSG00000204673	3180	3002	3537	3194	3241	3102	2561	2749	AKT1S1
ENSG00000135372	2615	2957	3743	3032	3235	2913	2560	3066	NAT10
ENSG00000091527	2682	2569	1627	2131	3235	3382	2687	3411	CDV3
ENSG00000061794	3097	2791	1433	2185	3235	3149	2363	3221	MRPS35
ENSG00000047315	3602	3782	1843	2753	3233	3539	2738	3521	POLR2B
ENSG00000104517	2349	3277	2142	2363	3232	3374	2649	3654	UBR5
ENSG00000198952	2603	2677	3278	2631	3230	3150	2537	2684	SMG5
ENSG00000152795	3828	3556	1096	1955	3227	3042	2613	3022	HNRNPDL
ENSG00000162433	4100	4547	3713	4348	3226	3449	4149	4160	AK4
ENSG00000165704	4602	3811	2441	3398	3222	3402	3403	3896	HPRT1
ENSG00000057608	3036	2900	2647	2602	3218	3153	3136	3603	GDI2
ENSG00000164687	4851	4056	2706	3686	3217	3516	3852	3263	FABP5
ENSG00000113282	2765	2916	1521	2131	3216	3252	2796	3173	CLINT1
ENSG00000169813	3498	3345	2602	3136	3214	2958	2591	3054	HNRNPF
ENSG00000117868	3658	3754	3327	3854	3211	3169	3212	3415	ESYT2
ENSG00000172531	3612	3297	4046	3754	3205	2963	2939	2614	PPP1CA
ENSG00000116754	3013	3500	970	1737	3195	3459	3044	3804	SRSF11
ENSG00000142173	2559	2394	4207	4158	3193	3177	4093	3361	COL6A2
ENSG00000113810	2397	3267	1426	1711	3191	3428	3350	4499	SMC4
ENSG00000104635	2638	2787	2314	2713	3190	3182	2226	3000	SLC39A14
ENSG00000170248	2907	3244	2335	2596	3184	3229	2781	3498	PDCD6IP
ENSG00000095139	1960	2434	1965	2307	3184	3259	2946	3713	ARCN1
ENSG00000144136	2384	2514	1469	2032	3184	3274	2613	3312	SLC20A1
ENSG00000134250	1970	3067	4595	3925	3175	3062	2219	3321	NOTCH2
ENSG00000101161	3012	2932	4170	3200	3172	2929	2925	2848	PRPF6
ENSG00000135677	2829	3026	4032	3996	3164	3327	3176	3734	GNS
ENSG00000134824	3416	3805	5298	4038	3158	3040	2850	2760	FADS2
ENSG00000141543	3542	3098	2490	2839	3158	2969	2594	2706	EIF4A3
ENSG00000100201	2800	3504	2003	2835	3155	3224	3525	4139	DDX17
ENSG00000155463	3341	3111	2803	3043	3154	3093	2497	3133	OXA1L
ENSG00000167747	3355	2904	1755	2816	3150	3080	2067	2258	C19orf48
ENSG00000099204	2611	3382	3752	3440	3145	3016	2395	3264	ABLIM1
ENSG00000116857	3846	3105	2960	3765	3144	3058	3369	2969	TMEM9
ENSG00000170017	2941	3217	1798	2142	3135	3186	3007	3602	ALCAM
ENSG00000125534	3118	2640	2885	4027	3133	3103	3359	3370	PPDPF
ENSG00000182934	2779	3009	4293	3986	3127	3067	3494	3645	SRPRA
ENSG00000164292	1829	1940	889	1442	3124	3499	2169	3291	RHOBTB3
ENSG00000094916	2272	3118	3777	3246	3121	3348	3377	4065	CBX5
ENSG00000060237	1729	2790	2302	2513	3119	2862	2154	3103	WNK1
ENSG00000101220	3597	2779	3090	3160	3118	3164	2509	2692	C20orf27
ENSG00000152661	3332	3371	1987	2939	3117	3111	3190	3610	GJA1
ENSG00000113387	4314	3648	1389	2326	3115	3098	3222	3536	SUB1
ENSG00000117362	3784	3447	3381	3910	3114	3022	3050	2900	APH1A
ENSG00000007376	3395	2747	2446	2349	3107	2871	1774	1923	RPUSD1
ENSG00000110660	2745	2892	1557	2092	3102	3043	2089	2551	SLC35F2
ENSG00000160633	3116	3060	2776	2504	3101	2929	2488	2578	SAFB
ENSG00000112335	3500	2981	2650	2968	3097	3083	3176	3405	SNX3
ENSG00000245532	2780	3097	814	1718	3086	3925	5295	5910	NEAT1
ENSG00000177156	3792	3180	3773	3470	3083	3237	3160	3167	TALDO1
ENSG00000198752	2124	3161	5308	4206	3082	3052	3162	3461	CDC42BPB
ENSG00000160075	3868	3310	4098	3627	3077	3091	2915	3001	SSU72
ENSG00000119707	2844	3419	1192	1400	3074	3300	2806	3481	RBM25
ENSG00000123908	1938	2821	2581	2557	3074	3017	2166	3150	AGO2
ENSG00000175602	4148	3217	3778	3749	3072	3072	2879	2753	CCDC85B
ENSG00000167548	1359	2797	3989	3223	3070	2510	2052	2583	KMT2D
ENSG00000167977	3264	2934	2212	2854	3068	2936	2401	2595	KCTD5
ENSG00000168159	3901	3439	5087	3928	3067	2930	3343	2705	RNF187
ENSG00000099901	3450	2770	2058	2248	3065	3033	2307	2739	RANBP1
ENSG00000092820	2897	3009	3705	3019	3064	3051	2934	2907	EZR
ENSG00000101986	2863	2864	4569	3602	3062	2870	2524	2677	ABCD1
ENSG00000165916	3238	2831	3537	2782	3060	2997	2822	2680	PSMC3
ENSG00000088986	3971	3330	2619	3380	3059	2920	3501	3323	DYNLL1
ENSG00000205922	3187	3484	2976	3825	3056	3231	3306	3578	ONECUT3
ENSG00000013588	2584	2783	3169	3014	3056	3069	3785	3389	GPRC5A
ENSG00000160691	2767	3201	4321	3920	3055	2931	4159	2972	SHC1
ENSG00000090863	2309	2766	4658	4064	3055	2821	3839	3670	GLG1
ENSG00000177606	2840	2525	1583	2283	3051	2987	1954	2634	JUN
ENSG00000156709	3686	3381	2758	3024	3050	3000	2561	2850	AIFM1
ENSG00000112118	3308	3185	2728	3093	3048	3074	2635	3091	MCM3
ENSG00000068654	1942	2714	4177	2739	3041	2693	1975	2565	POLR1A
ENSG00000173674	3484	3258	1527	2147	3038	2969	2359	3128	EIF1AX
ENSG00000127603	1948	3084	2651	2661	3035	2974	2381	3340	MACF1
ENSG00000277443	3536	3337	2660	3415	3033	2898	3359	3172	MARCKS
ENSG00000069329	2956	3139	2103	2460	3030	2945	2742	3270	VPS35
ENSG00000182446	2705	2708	3499	2839	3030	2990	2423	2673	NPLOC4
ENSG00000124486	2722	3356	2655	2592	3029	3110	3103	3646	USP9X
ENSG00000160213	4013	3074	2019	3323	3022	2820	3442	2894	CSTB
ENSG00000110713	2314	2716	3109	2826	3022	2972	2188	3022	NUP98
ENSG00000140319	3978	3430	1996	2767	3016	3040	3111	3080	SRP14
ENSG00000064601	2978	2834	2938	3385	3014	3086	2885	2872	CTSA
ENSG00000025772	3255	2950	3124	3017	3014	3020	2610	2779	TOMM34
ENSG00000101152	2886	3095	4273	3244	3013	2785	2879	2713	DNAJC5
ENSG00000253368	2098	1822	2081	1992	3013	2869	2670	2558	TRNP1
ENSG00000084207	3896	2992	3330	3754	3012	2560	2737	3119	GSTP1
ENSG00000213024	2786	2981	3668	3272	3012	3029	2718	2801	NUP62
ENSG00000125818	2534	2453	3023	2517	3011	2772	2283	2595	PSMF1
ENSG00000104964	3365	3048	3912	3770	3010	2822	3184	2674	AES
ENSG00000077147	2735	2887	1418	1792	3010	3226	2589	3284	TM9SF3
ENSG00000154174	2621	2623	2017	2211	3008	2870	2504	3117	TOMM70
ENSG00000156535	2495	3121	1904	2640	3006	3224	2728	3739	CD109
ENSG00000112787	2739	2648	3114	2831	2997	3006	2060	2565	FBRSL1
ENSG00000100528	3264	3306	2436	2867	2995	3263	2915	3502	CNIH1
ENSG00000154473	3435	3085	1685	2539	2995	3051	2650	3384	BUB3
ENSG00000105576	2563	3099	3583	3564	2994	2847	2882	3067	TNPO2
ENSG00000151239	3422	3542	1366	2091	2994	3287	2974	3328	TWF1
ENSG00000155561	2762	3136	2945	2836	2994	3084	2392	3316	NUP205
ENSG00000001497	2954	2839	3610	3076	2992	2731	2640	2644	LAS1L
ENSG00000180370	2575	2757	2777	2812	2991	3070	2479	3356	PAK2
ENSG00000011451	2359	2760	3336	2769	2990	2826	1978	2415	WIZ
ENSG00000247077	3338	3270	3660	3218	2986	2792	2203	2444	PGAM5
ENSG00000148660	2733	2851	2827	2981	2982	3127	2820	3007	CAMK2G
ENSG00000099624	4093	3069	3116	3476	2980	2793	2445	2508	ATP5F1D
ENSG00000123146	2605	2528	3293	3121	2977	2913	2637	2761	ADGRE5
ENSG00000105202	4033	3215	4257	3721	2975	2750	2650	2584	FBL
ENSG00000119669	3162	3049	4022	4049	2974	3064	2885	2898	IRF2BPL
ENSG00000151503	2550	3032	2620	2848	2974	3020	2281	3062	NCAPD3
ENSG00000182979	2894	3040	3761	3279	2972	3149	2607	2888	MTA1
ENSG00000079785	3087	2798	1284	1774	2970	3004	2127	2725	DDX1
ENSG00000066044	3238	3146	2957	3437	2968	2966	2585	2908	ELAVL1
ENSG00000168488	2110	2818	3273	3328	2966	2963	2273	2765	ATXN2L
ENSG00000006744	2543	2682	3371	2968	2965	2782	2239	2661	ELAC2
ENSG00000196591	3419	3344	1887	2254	2963	2942	3026	3359	HDAC2
ENSG00000196914	2461	3205	2461	2658	2962	2993	2623	3426	ARHGEF12
ENSG00000124795	3104	3281	1221	1592	2961	3066	2668	3327	DEK
ENSG00000180198	2814	2948	2605	2421	2957	2570	1785	2252	RCC1
ENSG00000188612	4107	3376	2134	3081	2956	2884	2940	2909	SUMO2
ENSG00000177885	3160	3149	3627	3170	2955	2889	2875	2719	GRB2
ENSG00000103512	2224	2755	3525	3202	2953	3165	2892	3008	NOMO1
ENSG00000153827	2422	2922	2546	2309	2951	3078	2482	3302	TRIP12
ENSG00000109332	3131	3067	1945	2427	2949	2972	2852	3131	UBE2D3
ENSG00000069849	3852	3279	2813	3125	2946	2943	2604	2906	ATP1B3
ENSG00000071462	3108	2762	2742	2742	2937	2760	2534	2435	BUD23
ENSG00000152102	2480	2823	2190	2589	2936	2873	1983	2558	FAM168B
ENSG00000004487	3191	3209	3839	3016	2933	2800	2878	3092	KDM1A
ENSG00000141959	3196	3175	6362	4792	2930	2838	3735	3051	PFKL
ENSG00000152952	3224	3343	1744	2393	2929	3020	4293	4044	PLOD2
ENSG00000103363	4363	3196	3175	3546	2926	2520	2942	2602	ELOB
ENSG00000014216	2705	2723	3981	3106	2924	2831	2567	2421	CAPN1
ENSG00000154277	2630	2279	1447	1948	2916	2645	1880	2371	UCHL1
ENSG00000166851	2646	2505	2567	2652	2916	2817	1829	2466	PLK1
ENSG00000182809	3580	2876	3171	4113	2915	2678	3994	2905	CRIP2
ENSG00000121060	2226	2527	3054	2788	2915	2738	2341	2680	TRIM25
ENSG00000161714	3062	2988	5122	3612	2913	2889	2819	2523	PLCD3
ENSG00000148843	2141	2574	3900	2735	2911	2625	2287	2776	PDCD11
ENSG00000142230	3162	2743	2898	2963	2909	2762	2435	2707	SAE1
ENSG00000111142	3022	3055	1052	1515	2909	3002	2400	2879	METAP2
ENSG00000084733	3159	3099	2307	2833	2906	2990	2721	3096	RAB10
ENSG00000110108	2872	2538	2826	2760	2906	2834	2145	2428	TMEM109
ENSG00000130164	2251	2734	3018	2909	2903	2914	2080	2725	LDLR
ENSG00000165688	3211	2852	2758	2948	2903	2813	2337	2407	PMPCA
ENSG00000157106	1727	2743	1580	1741	2901	2766	2142	3174	SMG1
ENSG00000159202	2673	2634	3737	3187	2899	2817	2802	2675	UBE2Z
ENSG00000139641	2692	2580	4959	3607	2896	2845	2604	3120	ESYT1
ENSG00000023228	2913	3188	2461	2858	2894	2919	2620	3161	NDUFS1
ENSG00000082641	2141	2550	3897	3269	2893	2601	3213	2751	NFE2L1
ENSG00000175793	3461	2707	2338	2923	2893	2669	2736	2426	SFN
ENSG00000148229	3371	3093	2558	2836	2892	2943	2333	2797	POLE3
ENSG00000173137	2068	2654	3324	2759	2884	3459	2709	3124	ADCK5
ENSG00000113648	3393	3176	3004	3148	2884	2950	2495	2853	H2AFY
ENSG00000159352	3370	2828	2841	2815	2880	2755	2926	2883	PSMD4
ENSG00000102241	3380	2986	1460	2170	2879	2832	2991	3083	HTATSF1
ENSG00000114686	2997	2917	1857	2349	2877	2761	2343	2894	MRPL3
ENSG00000105726	2368	2614	3208	2774	2873	2750	2020	2335	ATP13A1
ENSG00000203879	3382	3120	4228	4525	2872	2875	3891	3587	GDI1
ENSG00000008294	2588	3134	1816	2306	2871	2746	2866	3192	SPAG9
ENSG00000127824	3420	3079	3715	3736	2868	2837	3101	3253	TUBA4A
ENSG00000111676	2231	2629	3050	3028	2868	2617	2247	2392	ATN1
ENSG00000165424	2683	2709	4120	3522	2863	2906	3153	3072	ZCCHC24
ENSG00000135506	2492	2400	2659	2934	2860	2763	3090	2793	OS9
ENSG00000197111	3216	2683	2882	2548	2858	2715	2595	2744	PCBP2
ENSG00000160014	2992	3039	4327	4207	2854	2831	3831	3155	CALM3
ENSG00000054118	2310	2843	2019	1956	2854	2478	2125	2269	THRAP3
ENSG00000059573	3248	3210	4268	3824	2853	2862	2931	3127	ALDH18A1
ENSG00000125651	2744	2653	2991	2497	2849	2621	2343	2308	GTF2F1
ENSG00000159131	2706	2882	2741	2834	2841	2854	2525	3109	GART
ENSG00000038382	1742	2605	2260	2488	2841	2649	2123	2754	TRIO
ENSG00000167642	3257	2604	2308	3213	2840	2810	3297	2576	SPINT2
ENSG00000132466	1955	3080	2453	2394	2839	2709	2393	3173	ANKRD17
ENSG00000162521	3115	3004	2307	2482	2838	2899	2576	2811	RBBP4
ENSG00000067167	2541	2613	1419	2133	2837	3056	2843	3268	TRAM1
ENSG00000106628	3427	2982	5282	3847	2832	2676	3067	2859	POLD2
ENSG00000100462	2545	2716	2959	2852	2831	2796	2067	2607	PRMT5
ENSG00000139726	3356	3039	1839	2396	2831	2846	2505	2959	DENR
ENSG00000185567	2006	3644	9366	6545	2830	2482	4986	3630	AHNAK2
ENSG00000165802	3040	2962	4411	3544	2828	2624	2388	2492	NSMF
ENSG00000117632	3918	3137	2595	3647	2825	2758	3322	3498	STMN1
ENSG00000170540	3391	3033	2496	2878	2824	3091	3101	3541	ARL6IP1
ENSG00000115762	2666	2700	2734	2698	2821	3058	2542	3030	PLEKHB2
ENSG00000120802	3146	3031	1985	2614	2819	3118	2413	3337	TMPO
ENSG00000128918	2444	2677	2664	2653	2816	2956	2122	2954	ALDH1A2
ENSG00000159199	3668	2882	1867	3188	2815	2609	2279	2714	ATP5MC1
ENSG00000163428	2599	2978	1589	1656	2814	3244	2218	3345	LRRC58
ENSG00000113649	2601	3012	1202	1766	2814	2794	2034	2852	TCERG1
ENSG00000071553	2798	2406	2857	2783	2812	2718	2509	2563	ATP6AP1
ENSG00000006118	2896	2623	3944	3550	2812	2829	3535	2893	TMEM132A
ENSG00000158195	2521	2887	4992	3782	2809	2608	2630	2802	WASF2
ENSG00000196642	3155	2951	5105	3299	2808	2725	2800	2467	RABL6
ENSG00000131174	4287	3259	1523	2776	2805	2337	2759	2991	COX7B
ENSG00000144895	2755	2728	1077	1559	2804	2790	2175	2885	EIF2A
ENSG00000132780	3119	2890	1481	2249	2803	2574	2661	2758	NASP
ENSG00000113657	2349	2629	3282	2913	2801	2791	2443	2773	DPYSL3
ENSG00000142798	1541	2838	7318	4970	2800	2429	2940	2927	HSPG2
ENSG00000160113	3228	2712	3335	3023	2796	2721	2562	2276	NR2F6
ENSG00000130508	2276	3265	4771	4360	2795	2724	3356	3443	PXDN
ENSG00000135052	2073	2053	1376	1708	2790	2896	2739	2979	GOLM1
ENSG00000115419	2885	2882	1281	2114	2790	3330	3007	3784	GLS
ENSG00000189343	4026	3116	3662	4006	2789	2831	2544	2642	RPS2P46
ENSG00000125304	2865	2689	2368	2542	2785	3043	2720	3235	TM9SF2
ENSG00000125676	2429	2969	883	1243	2784	2668	2467	2939	THOC2
ENSG00000113368	2783	2785	1695	2800	2784	2654	2337	2884	LMNB1
ENSG00000109606	3013	3136	1481	2261	2783	2929	2469	3033	DHX15
ENSG00000087302	3333	2884	1625	2367	2781	2862	2817	3117	RTRAF
ENSG00000108639	3086	2453	2776	2980	2779	2624	2777	2620	SYNGR2
ENSG00000014641	3794	3063	1772	2569	2777	2884	2887	3140	MDH1
ENSG00000197785	3037	2648	3178	2513	2776	2576	1917	2108	ATAD3A
ENSG00000029363	2573	3089	1105	1358	2775	3097	2294	3119	BCLAF1
ENSG00000131981	3112	2886	2683	2643	2773	2616	3162	2529	LGALS3
ENSG00000172009	2901	2645	3242	2799	2771	2656	2166	2178	THOP1
ENSG00000173692	2682	2713	2186	2070	2771	2706	2352	2789	PSMD1
ENSG00000266412	2403	2520	1967	2107	2770	2857	2369	2821	NCOA4
ENSG00000147684	3305	2549	2031	2392	2769	2565	1920	2307	NDUFB9
ENSG00000184787	2599	2709	2218	2073	2768	2696	2344	2586	UBE2G2
ENSG00000163479	3199	2495	2340	3088	2767	2754	2780	2710	SSR2
ENSG00000167005	2797	2858	1576	2363	2762	2811	2252	3006	NUDT21
ENSG00000112308	2672	2687	1908	2301	2755	3016	2799	3209	C6orf62
ENSG00000177565	2360	2437	1017	1548	2754	2993	2781	3495	TBL1XR1
ENSG00000079999	2699	2622	2855	2802	2751	2606	1936	2089	KEAP1
ENSG00000147526	2360	2845	2410	2786	2751	2860	2813	3274	TACC1
ENSG00000178982	3491	2731	2823	2917	2750	2628	2339	2568	EIF3K
ENSG00000102804	2755	2492	2529	3168	2749	2821	3181	3275	TSC22D1
ENSG00000128641	3044	3647	2119	2733	2748	2737	2553	3035	MYO1B
ENSG00000100243	2701	2553	3047	3402	2747	2545	2736	2312	CYB5R3
ENSG00000213741	4703	3507	3144	2883	2746	1683	2729	2370	RPS29
ENSG00000172380	2306	2700	2316	2639	2745	2830	2768	3367	GNG12
ENSG00000261780	2695	2795	1437	1819	2744	2782	2283	2945	LINC02582
ENSG00000110090	2504	2734	4637	3211	2744	2620	2367	2901	CPT1A
ENSG00000136813	2363	2792	2425	2291	2744	2816	2290	2974	ECPAS
ENSG00000173402	2078	2517	3084	3002	2743	2392	2002	2344	DAG1
ENSG00000225630	2245	2808	3414	2885	2741	2462	2637	2675	MTND2P28
ENSG00000163466	3238	3134	2547	2706	2740	2873	2911	2870	ARPC2
ENSG00000102172	3524	2973	2604	3012	2740	2759	3132	3181	SMS
ENSG00000179271	3343	2543	3247	2676	2740	2342	2242	2201	GADD45GIP1
ENSG00000145555	2215	2978	3299	3173	2736	2602	2590	2840	MYO10
ENSG00000106070	2604	2821	3143	3127	2734	2689	3176	2865	GRB10
ENSG00000113575	2897	2530	1656	1907	2734	2755	2326	2598	PPP2CA
ENSG00000204256	2264	2481	2318	2571	2729	2667	2458	2702	BRD2
ENSG00000170312	2976	2778	1217	2312	2727	2938	3277	3936	CDK1
ENSG00000085719	2478	2811	2389	2766	2723	2881	2564	3335	CPNE3
ENSG00000118680	3115	2656	1338	2274	2722	2619	2759	2908	MYL12B
ENSG00000073060	2588	2495	2666	2925	2722	2649	2293	2428	SCARB1
ENSG00000197226	2706	3044	4386	3585	2721	2662	2592	2363	TBC1D9B
ENSG00000104529	2570	2464	2791	2289	2718	2934	2258	2542	EEF1D
ENSG00000204389	2855	2409	2999	3205	2714	2385	3201	3178	HSPA1A
ENSG00000123989	2491	2289	3619	3657	2712	2551	3617	2837	CHPF
ENSG00000108592	2473	2440	2571	2289	2703	2511	2082	2377	FTSJ3
ENSG00000164934	2857	2397	1074	1708	2703	2775	2391	2971	DCAF13
ENSG00000143418	2453	2741	3660	3538	2701	2950	2469	2908	CERS2
ENSG00000105993	2441	2470	1654	1985	2698	2564	2014	2485	DNAJB6
ENSG00000101166	3193	3051	1191	1948	2696	2862	2607	2996	PRELID3B
ENSG00000101474	2582	2539	2350	2706	2695	2473	2636	2554	APMAP
ENSG00000102054	2989	2739	2097	2448	2691	2483	2358	2744	RBBP7
ENSG00000031698	2946	2706	3028	2735	2690	2651	2422	2505	SARS
ENSG00000099797	2747	2409	3433	3316	2690	2486	2590	2440	TECR
ENSG00000103222	1990	2437	3095	2690	2689	2431	2064	2387	ABCC1
ENSG00000149547	3117	2938	3854	2922	2681	2817	2574	2771	EI24
ENSG00000106636	2957	2579	3187	2801	2681	2607	2507	2365	YKT6
ENSG00000167900	2900	2374	3042	2645	2681	2627	2336	2366	TK1
ENSG00000205581	3268	2857	1557	2313	2677	2749	2687	2987	HMGN1
ENSG00000167965	3166	2838	4664	3447	2674	2636	2421	2385	MLST8
ENSG00000227097	4615	3299	2451	3621	2673	2381	2532	2399	RPS28P7
ENSG00000002834	2275	2362	3599	2703	2672	2591	2383	2372	LASP1
ENSG00000172893	2015	2185	2403	2290	2671	2445	1610	2154	DHCR7
ENSG00000148334	3211	2844	3190	2947	2669	2624	2301	2291	PTGES2
ENSG00000104969	2837	2604	2976	2512	2669	2493	2021	1981	SGTA
ENSG00000185627	3164	2691	2534	2432	2665	2712	2291	2305	PSMD13
ENSG00000124783	2692	2823	1832	1941	2661	2794	2642	3017	SSR1
ENSG00000143320	4126	3226	2826	3932	2659	2321	3598	2480	CRABP2
ENSG00000164919	3840	3014	905	2289	2659	2187	2458	2416	COX6C
ENSG00000181915	2680	2509	2175	2599	2658	2722	2581	2814	ADO
ENSG00000113739	2745	2937	1860	2704	2656	2520	2447	2436	STC2
ENSG00000160007	2131	2845	3545	3042	2656	2559	2380	2621	ARHGAP35
ENSG00000103326	2449	2801	2882	2674	2653	2595	1979	2339	CAPN15
ENSG00000101160	2344	2231	2283	2944	2652	2521	3125	2625	CTSZ
ENSG00000156599	2066	2500	3230	2800	2651	2477	2260	2572	ZDHHC5
ENSG00000131828	3068	2753	2183	2700	2651	2572	2334	2747	PDHA1
ENSG00000169908	4288	3932	2882	4118	2642	2789	3517	3228	TM4SF1
ENSG00000009954	2313	2744	2552	2541	2642	2675	2523	2967	BAZ1B
ENSG00000169251	2882	3010	1279	1826	2639	2870	2681	3174	NMD3
ENSG00000124172	3928	2865	940	2155	2639	1866	2449	2373	ATP5F1E
ENSG00000108588	2794	2772	1356	1708	2639	2813	2317	2790	CCDC47
ENSG00000175390	3258	2709	3180	3190	2638	2697	2177	2601	EIF3F
ENSG00000122034	3053	2530	2664	2860	2635	2401	2468	2855	GTF3A
ENSG00000122952	2606	2364	1533	2067	2635	2509	2355	2520	ZWINT
ENSG00000113504	1877	2260	4066	3266	2632	2397	2262	2907	SLC12A7
ENSG00000120885	2789	2296	2329	3711	2628	2606	3461	3294	CLU
ENSG00000161013	2987	2558	2542	2937	2626	2707	2530	2444	MGAT4B
ENSG00000132305	3041	2816	2606	2452	2623	2922	2333	2889	IMMT
ENSG00000183853	1999	2688	4340	3576	2621	2521	2621	2864	KIRREL1
ENSG00000084070	2264	2535	2738	2738	2619	2488	2274	2437	SMAP2
ENSG00000072958	2319	2247	2434	2656	2614	2438	2201	2333	AP1M1
ENSG00000113552	3013	2911	2932	3269	2613	2571	2531	2782	GNPDA1
ENSG00000149091	2305	2340	3452	2439	2613	2518	2012	2051	DGKZ
ENSG00000167962	2230	2553	2421	2289	2611	2526	1873	2193	ZNF598
ENSG00000167721	2192	2619	1982	2042	2610	2592	1717	2299	TSR1
ENSG00000107372	2803	2741	1699	2310	2609	2801	2297	2846	ZFAND5
ENSG00000142657	2148	2054	2571	2220	2606	2327	2026	2392	PGD
ENSG00000100280	2334	2441	3905	2856	2606	2485	2346	2367	AP1B1
ENSG00000116288	3124	3067	2498	2962	2602	2393	2891	2528	PARK7
ENSG00000142453	2330	2628	4014	3120	2602	2490	2149	2162	CARM1
ENSG00000162734	2148	2077	1977	2297	2602	2549	2215	2465	PEA15
ENSG00000142949	2505	3537	7896	5803	2601	2610	3467	3234	PTPRF
ENSG00000105438	3176	2770	3279	3531	2598	2669	3086	2781	KDELR1
ENSG00000099341	2818	2605	2909	2589	2598	2343	2186	2257	PSMD8
ENSG00000136731	2096	2380	3093	2621	2596	2603	2298	3144	UGGT1
ENSG00000160208	2013	2426	1948	1883	2596	2532	1654	2101	RRP1B
ENSG00000113716	2143	2345	3242	2658	2594	2520	2283	2291	HMGXB3
ENSG00000174243	2426	2413	2763	2669	2591	2426	2304	2215	DDX23
ENSG00000132676	3059	2740	1865	2353	2590	2663	2251	2465	DAP3
ENSG00000123505	2592	2731	1209	1731	2587	2840	2322	2773	AMD1
ENSG00000104331	2568	2887	2385	2574	2587	2623	2377	2917	IMPAD1
ENSG00000101158	2717	2692	2482	2486	2587	2453	2067	2277	NELFCD
ENSG00000115884	2928	2710	3285	3286	2587	2318	2463	2292	SDC1
ENSG00000101558	2881	2478	1616	2180	2584	2739	2345	2672	VAPA
ENSG00000131467	2733	2528	2553	2615	2584	2611	1804	2332	PSME3
ENSG00000077097	2421	2825	1409	1654	2575	2765	2436	2969	TOP2B
ENSG00000170759	2351	2738	1169	1463	2575	2829	2160	3203	KIF5B
ENSG00000136156	2523	2226	1355	2092	2572	2594	2854	2750	ITM2B
ENSG00000197635	2672	2974	2286	2520	2571	2506	2650	2994	DPP4
ENSG00000149639	1584	2590	5219	3830	2568	2617	2233	3137	SOGA1
ENSG00000182087	2200	2378	2066	2262	2564	2467	2303	2276	TMEM259
ENSG00000061676	2352	2468	992	1669	2560	2751	2103	2823	NCKAP1
ENSG00000162302	2338	2268	2709	2229	2560	2511	1662	1876	RPS6KA4
ENSG00000065911	2807	2576	1694	2390	2559	2707	2196	2780	MTHFD2
ENSG00000117724	1959	3028	1738	1522	2559	2613	2818	3625	CENPF
ENSG00000140983	2828	2423	1459	2239	2557	2526	2122	2159	RHOT2
ENSG00000050820	2606	2483	3242	2934	2555	2503	2429	2277	BCAR1
ENSG00000173113	3487	2680	1637	2890	2555	2309	2383	2190	TRMT112
ENSG00000204843	2087	2428	3780	2759	2555	2400	2225	2175	DCTN1
ENSG00000125648	2491	3033	4349	3495	2552	2402	2697	2330	SLC25A23
ENSG00000090776	2875	3216	4582	4114	2549	2218	3428	2529	EFNB1
ENSG00000102900	2486	2524	2398	2484	2549	2573	2006	2447	NUP93
ENSG00000175061	2982	2529	2767	2849	2548	2488	2706	2457	LRRC75A-AS1
ENSG00000173726	2923	2842	1971	2208	2548	2601	2126	2522	TOMM20
ENSG00000107937	2409	2247	1244	1677	2543	2581	2091	2307	GTPBP4
ENSG00000148498	2463	2821	3138	2936	2540	2624	2499	2754	PARD3
ENSG00000237550	4151	3293	3012	3800	2539	2929	3001	2845	RPL9P9
ENSG00000125148	2858	2073	1269	2693	2539	1958	2634	2375	MT2A
ENSG00000166619	2412	2524	1838	2052	2539	2380	2166	2092	BLCAP
ENSG00000230989	3105	2537	1583	2608	2539	2187	2520	2557	HSBP1
ENSG00000143319	2822	2831	3024	2925	2538	2585	2204	2466	ISG20L2
ENSG00000150768	2418	2454	1465	1933	2537	2600	1771	2571	DLAT
ENSG00000076554	3170	2621	1717	2281	2536	2703	2782	2959	TPD52
ENSG00000130254	2116	2144	1698	1784	2536	2153	1671	1780	SAFB2
ENSG00000196411	2504	2576	3947	3242	2534	2436	2454	2339	EPHB4
ENSG00000131238	2449	2372	2671	2370	2533	2530	2270	2601	PPT1
ENSG00000196504	2451	2709	1059	1283	2532	2760	2429	2937	PRPF40A
ENSG00000106348	2566	2541	2799	2605	2528	2477	2096	2167	IMPDH1
ENSG00000141456	2402	2412	2766	2472	2524	2608	1957	2125	PELP1
ENSG00000116016	2038	2516	3030	2718	2520	2447	2151	2406	EPAS1
ENSG00000113569	2053	2350	2264	1982	2520	2690	2188	2916	NUP155
ENSG00000136270	2840	2596	3473	3197	2517	2489	2373	2465	TBRG4
ENSG00000139218	2180	2899	1239	1664	2517	2690	2757	3194	SCAF11
ENSG00000184254	1910	1913	1481	2551	2510	2811	2316	2882	ALDH1A3
ENSG00000091542	2693	2534	2918	3371	2509	2589	2915	2926	ALKBH5
ENSG00000214706	2655	2414	2858	2734	2506	2514	1885	2202	IFRD2
ENSG00000178921	1959	2366	3721	2989	2506	2380	1911	2466	PFAS
ENSG00000099814	1673	1979	2501	2061	2506	2298	1833	2013	CEP170B
ENSG00000140350	3008	2733	1850	2197	2504	2444	2443	2633	ANP32A
ENSG00000206075	2094	2277	890	1280	2496	2525	2155	2314	SERPINB5
ENSG00000140990	3077	2241	2478	2469	2495	2187	2056	2083	NDUFB10
ENSG00000105364	2829	2506	2121	2578	2493	2858	1768	2206	MRPL4
ENSG00000086598	2667	2873	2143	2417	2490	2484	2208	2528	TMED2
ENSG00000146072	2874	3104	4342	3949	2487	2545	3198	2838	TNFRSF21
ENSG00000117410	3006	2275	2138	2529	2487	2365	2273	2255	ATP6V0B
ENSG00000149187	2220	2331	1651	2065	2485	2462	2227	2491	CELF1
ENSG00000115415	1501	1642	1366	1530	2484	2043	3727	2871	STAT1
ENSG00000129562	2911	2527	2703	2616	2480	2291	2954	2533	DAD1
ENSG00000147224	2929	2711	1933	2301	2478	2521	2059	2321	PRPS1
ENSG00000181789	2020	2132	3072	2524	2477	2356	2777	2772	COPG1
ENSG00000049323	2789	3125	3863	3687	2476	2556	2880	3069	LTBP1
ENSG00000072071	2633	2900	4195	3080	2476	2429	2430	2141	ADGRL1
ENSG00000110047	2323	2158	3136	2374	2476	2242	2013	2005	EHD1
ENSG00000168827	2377	2429	1001	1490	2475	2404	1403	2224	GFM1
ENSG00000108819	2471	2716	4175	3519	2474	2350	2767	2525	PPP1R9B
ENSG00000168496	2832	2440	1731	2119	2473	2437	2017	2378	FEN1
ENSG00000055044	2707	2790	737	1169	2468	2562	2013	2630	NOP58
ENSG00000135390	3246	2496	2135	3045	2465	2175	2429	2434	ATP5MC2
ENSG00000148396	1673	2106	3272	2525	2462	2271	2029	2463	SEC16A
ENSG00000105355	2216	2249	3471	2725	2462	2269	2574	2274	PLIN3
ENSG00000011426	2033	2424	1194	1552	2462	2575	2422	3471	ANLN
ENSG00000107438	2828	2524	2429	2725	2459	2231	2388	2070	PDLIM1
ENSG00000099995	1916	2143	2600	2558	2459	2302	1804	2170	SF3A1
ENSG00000188529	2634	2474	1092	1804	2457	2481	2085	2693	SRSF10
ENSG00000035862	2943	2792	4031	4321	2456	2611	3629	3144	TIMP2
ENSG00000165671	1751	2559	2944	2728	2456	2430	2158	2711	NSD1
ENSG00000153560	2107	2353	1570	1868	2450	2460	1860	2334	UBP1
ENSG00000108946	2581	2473	1662	2651	2447	2568	2806	3040	PRKAR1A
ENSG00000157020	2432	2079	2297	2335	2447	2157	2384	2192	SEC13
ENSG00000127483	2323	2793	1667	2435	2447	2451	2570	3156	HP1BP3
ENSG00000160072	2623	2345	2188	1832	2446	2252	1432	1895	ATAD3B
ENSG00000140575	1841	2277	1889	1907	2445	2307	2194	2783	IQGAP1
ENSG00000039560	2311	2570	1392	1817	2444	2594	3508	3027	RAI14
ENSG00000146535	2384	2443	3520	3212	2440	2369	2322	2406	GNA12
ENSG00000100632	3171	2811	1094	2143	2439	2339	2326	2408	ERH
ENSG00000165410	2696	2479	1536	2007	2439	2574	2284	2676	CFL2
ENSG00000143368	2299	2140	1384	2154	2438	2361	1606	1957	SF3B4
ENSG00000005339	1535	2436	2337	2336	2437	2429	1545	2238	CREBBP
ENSG00000171793	2284	2258	2269	2226	2437	2475	2082	2475	CTPS1
ENSG00000100300	2581	2100	1460	2449	2436	2090	2038	1804	TSPO
ENSG00000162607	2391	2426	1042	1224	2434	2479	1831	2547	USP1
ENSG00000189143	3264	2680	3021	3561	2433	2258	3216	2646	CLDN4
ENSG00000183751	2806	2380	3150	2794	2432	2536	2238	2269	TBL3
ENSG00000064102	2323	2320	1467	1635	2432	2615	2721	3218	INTS13
ENSG00000139842	2687	2608	1725	2278	2432	2688	2047	2541	CUL4A
ENSG00000124831	2339	2697	1279	1781	2432	2337	2315	2688	LRRFIP1
ENSG00000116685	2412	2207	3233	2921	2431	2373	2555	2193	KIAA2013
ENSG00000166228	2654	2211	2042	2858	2428	2191	2552	2658	PCBD1
ENSG00000143420	3060	2614	1932	2456	2427	2098	2245	2206	ENSA
ENSG00000148730	2210	2474	2892	2826	2423	2350	2453	2671	EIF4EBP2
ENSG00000175931	2112	2587	3371	2627	2423	2369	1984	2277	UBE2O
ENSG00000136295	1940	2213	3505	2924	2422	2231	2812	2392	TTYH3
ENSG00000023330	2352	2221	2007	2112	2421	2301	2178	2174	ALAS1
ENSG00000108848	2370	2576	611	945	2417	2463	2530	2847	LUC7L3
ENSG00000123159	2781	2295	2445	2627	2416	2409	2371	1988	GIPC1
ENSG00000135821	2943	3162	3820	3691	2413	2373	2818	2637	GLUL
ENSG00000105426	1823	2634	5805	4003	2413	2211	3006	3141	PTPRS
ENSG00000169564	2474	2542	2218	2906	2411	2446	1907	2151	PCBP1
ENSG00000141551	2440	2342	2352	2660	2410	2553	2284	2116	CSNK1D
ENSG00000105329	2259	2198	3440	2825	2405	2354	2322	2167	TGFB1
ENSG00000197601	2657	2746	924	1551	2404	2695	2557	3245	FAR1
ENSG00000170345	3059	2217	173	565	2402	2569	40	895	FOS
ENSG00000103194	2368	2358	2274	2200	2401	2366	2050	2499	USP10
ENSG00000139629	1781	2056	3116	2405	2401	2324	2596	2322	GALNT6
ENSG00000117505	2950	2770	2155	2446	2398	2506	2541	2726	DR1
ENSG00000123131	2905	2367	2516	2441	2398	2236	2353	2156	PRDX4
ENSG00000161179	2663	2252	2222	2433	2397	2337	1753	1923	YDJC
ENSG00000173821	1265	2118	3631	2777	2392	2189	2644	2913	RNF213
ENSG00000141030	2240	2054	1872	1755	2391	2266	1722	2205	COPS3
ENSG00000169398	2419	2770	1933	2701	2387	2596	2865	3034	PTK2
ENSG00000123349	3290	2565	1792	2461	2384	2300	2474	2322	PFDN5
ENSG00000167969	2852	2171	2491	2660	2384	2164	1854	1751	ECI1
ENSG00000130414	2599	2333	1918	2530	2383	2227	2162	2528	NDUFA10
ENSG00000112977	2509	2381	2646	2696	2382	2426	2422	2291	DAP
ENSG00000007080	3340	2850	2823	3361	2381	2236	2430	2077	CCDC124
ENSG00000102158	2624	2563	2074	2499	2381	2480	2291	2720	MAGT1
ENSG00000123575	2444	2442	1602	1992	2381	2425	2086	2745	FAM199X
ENSG00000072062	2021	2348	2649	2633	2381	2146	2106	2001	PRKACA
ENSG00000103275	2877	2353	2527	2527	2380	2268	2081	2017	UBE2I
ENSG00000100888	1604	2287	2724	2210	2380	2302	1942	2495	CHD8
ENSG00000162368	2709	2576	1679	2131	2378	2530	2561	2696	CMPK1
ENSG00000133265	2241	1841	2255	2163	2378	2495	1854	1922	HSPBP1
ENSG00000129083	2303	2213	1100	1736	2371	2680	2707	2954	COPB1
ENSG00000110696	2522	2254	1387	1785	2370	2361	2158	2431	C11orf58
ENSG00000166181	2327	2283	1352	1798	2370	2511	1909	2578	API5
ENSG00000063241	2563	1965	2335	2312	2369	2070	1864	1706	ISOC2
ENSG00000102699	1588	1960	1575	1548	2369	2308	2017	2523	PARP4
ENSG00000163811	2382	2610	1178	1498	2365	2385	1611	2022	WDR43
ENSG00000165934	2340	2590	1451	2008	2361	2457	2320	2913	CPSF2
ENSG00000175063	2649	2097	1274	2197	2361	2096	2030	2436	UBE2C
ENSG00000163110	2285	2636	1880	2105	2359	2483	2768	2611	PDLIM5
ENSG00000116717	2423	2115	806	1544	2359	2402	1951	1872	GADD45A
ENSG00000148672	2477	2454	1956	2338	2357	2353	2029	2540	GLUD1
ENSG00000042753	2992	2415	1844	2365	2357	2276	2105	1793	AP2S1
ENSG00000101421	2794	2280	1781	2347	2355	2168	2190	1909	CHMP4B
ENSG00000112473	2479	2380	1973	2352	2353	2145	2368	2055	SLC39A7
ENSG00000101199	2250	2224	2737	2229	2351	2356	2382	2257	ARFGAP1
ENSG00000168653	3636	2919	2217	2457	2348	2155	2515	2046	NDUFS5
ENSG00000154175	3055	4298	3233	4848	2347	2403	3545	3804	ABI3BP
ENSG00000105520	2496	2423	3408	3030	2346	2329	2492	2155	PLPPR2
ENSG00000105671	2364	2171	2522	2326	2345	2224	1824	1994	DDX49
ENSG00000169727	2700	2478	3125	2701	2344	2274	2053	2077	GPS1
ENSG00000046604	1798	2210	1177	1838	2342	2294	2103	2924	DSG2
ENSG00000168710	2081	2189	3137	2725	2338	2253	2762	2957	AHCYL1
ENSG00000112531	1821	2211	1441	1733	2336	2578	2371	2965	QKI
ENSG00000091140	2585	2568	892	1609	2334	2677	2023	2688	DLD
ENSG00000213639	3017	2936	2499	2191	2333	2555	3003	3022	PPP1CB
ENSG00000135940	3777	2764	2293	3020	2333	2015	2346	2040	COX5B
ENSG00000176903	2468	2237	1656	2016	2331	2347	1938	2067	PNMA1
ENSG00000153147	2448	2411	1062	1472	2331	2411	2120	2924	SMARCA5
ENSG00000104131	2417	2479	1120	1429	2330	2272	1809	2487	EIF3J
ENSG00000147955	2208	2326	2910	2808	2329	2176	2312	2125	SIGMAR1
ENSG00000088888	1613	1899	3486	2415	2329	2262	2554	2482	MAVS
ENSG00000249992	2491	1926	1613	1739	2329	2341	1891	1981	TMEM158
ENSG00000138757	2168	2300	1689	2092	2328	2434	2382	2690	G3BP2
ENSG00000105197	2887	2550	3412	2607	2327	2289	1956	2019	TIMM50
ENSG00000117713	1629	2328	2939	2566	2327	2196	1764	2324	ARID1A
ENSG00000105669	2754	2057	2122	2373	2325	2456	2324	1946	COPE
ENSG00000080845	1749	2105	2949	2376	2325	2236	2141	2190	DLGAP4
ENSG00000265241	2774	2430	1544	1999	2323	2374	2069	2302	RBM8A
ENSG00000186591	2279	2518	2229	2674	2321	2373	2972	2542	UBE2H
ENSG00000158615	1908	2049	1130	1786	2320	2246	1814	2475	PPP1R15B
ENSG00000096746	2632	2447	1185	1936	2320	2471	2556	3119	HNRNPH3
ENSG00000138829	1956	2652	3262	3206	2319	2250	1879	2941	FBN2
ENSG00000030066	2036	2332	1617	1798	2317	2389	1875	2447	NUP160
ENSG00000109685	2237	2644	3521	3153	2314	2229	2414	2570	NSD2
ENSG00000153201	1751	2391	1154	1171	2314	2370	2151	2896	RANBP2
ENSG00000186193	2716	2809	3570	3291	2313	2264	2039	2110	SAPCD2
ENSG00000106244	3132	2720	2177	2582	2311	2006	2167	1993	PDAP1
ENSG00000056097	1963	2357	1257	1592	2309	2509	1894	2668	ZFR
ENSG00000204574	2238	2223	2231	2078	2308	2231	1795	2069	ABCF1
ENSG00000141867	1789	2311	2752	2450	2307	2297	1974	2085	BRD4
ENSG00000179195	2514	2793	1732	2352	2306	2323	2213	2628	ZNF664
ENSG00000172053	2180	2109	3109	2492	2304	2244	2121	2283	QARS
ENSG00000142089	1716	1299	932	1631	2303	1884	3389	2295	IFITM3
ENSG00000128283	2316	2152	2226	2407	2302	2273	1704	1884	CDC42EP1
ENSG00000160803	1997	2304	3256	2467	2301	2155	1970	2129	UBQLN4
ENSG00000122705	2541	2277	1806	2242	2299	2099	1984	1857	CLTA
ENSG00000063660	2152	2100	3839	3097	2299	2175	2194	2163	GPC1
ENSG00000171848	2351	2145	1254	1710	2299	2382	1445	2104	RRM2
ENSG00000168283	2792	2632	1229	1768	2297	2443	2135	2598	BMI1
ENSG00000109519	2677	2403	1862	2095	2296	2023	1963	2056	GRPEL1
ENSG00000149658	2121	2180	1701	2059	2294	2271	1773	2219	YTHDF1
ENSG00000156502	2172	2008	1370	1649	2293	2155	1516	2101	SUPV3L1
ENSG00000072501	1831	2358	2094	2264	2293	2120	1846	2417	SMC1A
ENSG00000101557	2260	2142	1253	1747	2292	2403	1833	2373	USP14
ENSG00000143702	1822	2615	1210	1674	2291	2561	2204	2645	CEP170
ENSG00000055070	2146	2184	2602	2301	2290	2055	1795	1906	SZRD1
ENSG00000112159	1211	2043	1730	1511	2290	2007	1455	2194	MDN1
ENSG00000127314	2384	2149	1244	1648	2289	2364	1979	2380	RAP1B
ENSG00000117335	2182	2305	765	1562	2288	2441	2262	2729	CD46
ENSG00000133275	2511	2318	3085	2808	2287	2120	2029	1966	CSNK1G2
ENSG00000161813	1902	2103	1090	1207	2287	2480	2215	3143	LARP4
ENSG00000070367	2085	2131	1128	1533	2285	2509	2274	3074	EXOC5
ENSG00000168175	2178	2035	1700	2058	2284	2437	2235	2586	MAPK1IP1L
ENSG00000145833	2122	2431	786	1006	2284	2174	1595	2002	DDX46
ENSG00000110367	2019	2454	2601	2080	2283	2162	2130	2538	DDX6
ENSG00000068366	2377	2525	1598	1752	2282	2551	2423	3064	ACSL4
ENSG00000102225	2247	2308	3938	3138	2282	1995	2472	2280	CDK16
ENSG00000132155	2230	2206	1803	1965	2278	2281	1722	2138	RAF1
ENSG00000136261	2461	2297	1958	2062	2277	2318	2055	2206	BZW2
ENSG00000125520	2561	2270	2856	2701	2277	2080	1919	1773	SLC2A4RG
ENSG00000139514	1447	1899	2468	2019	2276	2155	1326	1833	SLC7A1
ENSG00000178252	2089	2218	2981	2682	2274	2195	1808	2142	WDR6
ENSG00000273749	2206	2470	3570	2974	2272	2338	2298	2255	CYFIP1
ENSG00000182307	2756	2358	2478	2844	2271	2281	1652	1889	C8orf33
ENSG00000097021	2347	2065	2448	2458	2271	2202	1981	1938	ACOT7
ENSG00000225614	1494	2241	3976	2620	2271	2051	1371	1823	ZNF469
ENSG00000137710	1874	2054	1156	1501	2271	2269	2108	2655	RDX
ENSG00000251562	2024	2454	799	1043	2269	2754	3523	3709	MALAT1
ENSG00000198805	2452	2394	1662	1983	2269	2411	1885	2162	PNP
ENSG00000064607	1934	2255	1510	2051	2267	2267	2264	2554	SUGP2
ENSG00000116521	2189	1866	1822	2131	2267	2375	1843	2144	SCAMP3
ENSG00000102178	2996	2685	3234	3231	2265	2110	2156	1963	UBL4A
ENSG00000127463	1913	2047	2920	2833	2265	2401	2331	2554	EMC1
ENSG00000149115	2039	2240	3895	2728	2264	2031	2383	2031	TNKS1BP1
ENSG00000162613	1960	2464	1489	1756	2264	2376	2230	2508	FUBP1
ENSG00000198843	2137	2019	1213	1583	2264	2331	2059	2353	SELENOT
ENSG00000005893	2127	2263	1745	2191	2263	2347	2320	2641	LAMP2
ENSG00000159842	1835	2071	2933	2466	2261	2361	2415	2334	ABR
ENSG00000140632	1996	2190	1831	2264	2261	2198	1992	2261	GLYR1
ENSG00000079459	2547	2423	2146	2378	2260	2193	1903	2126	FDFT1
ENSG00000096063	2142	2299	1824	1796	2259	2252	2247	2587	SRPK1
ENSG00000105221	2069	2422	3074	2515	2258	2166	2022	1836	AKT2
ENSG00000100567	2556	2234	848	1404	2255	2408	2203	2649	PSMA3
ENSG00000125743	3428	2650	2193	2693	2254	1979	2278	1942	SNRPD2
ENSG00000129038	1884	1714	2609	2418	2253	2175	2575	2342	LOXL1
ENSG00000118200	1716	2272	1173	1333	2253	2239	1849	2504	CAMSAP2
ENSG00000111581	2226	2278	942	1435	2253	2275	2109	2650	NUP107
ENSG00000106609	2162	2153	1527	2150	2251	2142	1882	2174	TMEM248
ENSG00000177732	2434	2606	4234	3254	2250	2081	2462	2200	SOX12
ENSG00000173120	1676	2165	2704	2210	2250	2024	1937	2206	KDM2A
ENSG00000111667	2181	2099	3092	2561	2250	2236	2026	2204	USP5
ENSG00000136448	2074	2143	2808	2321	2247	2177	2103	2326	NMT1
ENSG00000173207	2936	2304	1751	2389	2246	2183	2154	2334	CKS1B
ENSG00000134851	3016	2860	1674	2209	2245	2322	2312	2306	TMEM165
ENSG00000157933	1944	2325	3800	2731	2245	2351	1914	2064	SKI
ENSG00000196923	2170	1953	1223	1482	2245	2279	1656	1666	PDLIM7
ENSG00000153317	1515	2082	1190	1618	2245	2223	1591	2485	ASAP1
ENSG00000143294	2479	2408	2790	2430	2244	2294	1943	2012	PRCC
ENSG00000062822	2170	2252	3178	2598	2244	2209	1958	2035	POLD1
ENSG00000198242	3248	2743	2350	2590	2242	2450	2510	2301	RPL23A
ENSG00000101191	1656	2068	1858	1810	2241	2153	1631	2042	DIDO1
ENSG00000171298	2051	1974	3578	3248	2239	2175	3172	2479	GAA
ENSG00000143256	2769	2318	1238	2023	2239	1837	2168	2019	PFDN2
ENSG00000131724	2088	2024	1714	2190	2238	2284	2365	2549	IL13RA1
ENSG00000135446	2560	2288	2521	2682	2237	2108	1871	1937	CDK4
ENSG00000244462	2155	2297	1802	2285	2234	2258	1918	2419	RBM12
ENSG00000131389	1549	2065	1723	1709	2234	2082	1407	1618	SLC6A6
ENSG00000167779	2417	1861	1859	1950	2233	2099	2887	1774	IGFBP6
ENSG00000099821	2235	2197	3422	2557	2229	2134	2042	1962	POLRMT
ENSG00000182512	2659	2296	2544	2369	2227	1993	1933	1779	GLRX5
ENSG00000079739	2737	2421	3952	3135	2225	2233	2791	2511	PGM1
ENSG00000198231	1943	2209	1320	1448	2225	2204	2035	2257	DDX42
ENSG00000264364	2071	2142	2639	2181	2225	1922	2020	1941	DYNLL2
ENSG00000131446	2353	2129	3263	2620	2223	2002	2278	1839	MGAT1
ENSG00000111206	1636	2063	3011	2185	2223	2225	1476	2057	FOXM1
ENSG00000170142	2427	2201	1249	1719	2221	2105	2214	2372	UBE2E1
ENSG00000108344	1879	1894	2090	1970	2220	2026	1644	1702	PSMD3
ENSG00000156467	2665	2416	881	1503	2218	1785	2162	2217	UQCRB
ENSG00000203668	2191	2807	1036	1276	2218	2496	2124	2944	CHML
ENSG00000184900	2295	1993	1675	2131	2216	1933	1513	1652	SUMO3
ENSG00000170779	2461	2333	1611	2375	2215	2116	1783	1760	CDCA4
ENSG00000109475	3355	2709	1833	2279	2213	1944	2164	2211	RPL34
ENSG00000111481	2695	2244	2407	2601	2213	2149	2297	2311	COPZ1
ENSG00000088930	1931	2058	1422	1673	2213	2216	1687	2124	XRN2
ENSG00000213593	2415	2125	1899	2160	2212	2134	1721	2151	TMX2
ENSG00000100219	1946	1605	1934	1919	2210	2123	2048	2091	XBP1
ENSG00000181467	2252	2173	2735	1935	2210	2149	2279	2142	RAP2B
ENSG00000143401	2670	2802	1157	1529	2210	2218	2297	2673	ANP32E
ENSG00000162402	1612	2267	1617	1620	2210	2340	1670	2312	USP24
ENSG00000136758	2246	2252	1485	1808	2209	2309	2132	2489	YME1L1
ENSG00000105058	2420	2289	1647	1960	2205	2090	1968	1874	FAM32A
ENSG00000158864	2283	1856	1704	2201	2204	2124	2133	2219	NDUFS2
ENSG00000141759	3096	2598	2246	2394	2204	2103	2080	1879	TXNL4A
ENSG00000169692	2561	2108	3063	2314	2203	2004	2191	1644	AGPAT2
ENSG00000124226	2249	2111	1799	2134	2201	2194	2096	2014	RNF114
ENSG00000136193	2058	2474	3241	2853	2200	2182	2287	2580	SCRN1
ENSG00000176105	2143	2158	1164	1347	2200	2189	2002	2545	YES1
ENSG00000100297	1790	1944	2396	2111	2200	2044	1504	1902	MCM5
ENSG00000065526	1155	2111	1705	1714	2199	1943	1678	1926	SPEN
ENSG00000171988	1581	2508	865	994	2198	2300	2270	2541	JMJD1C
ENSG00000148337	1734	2223	2933	2061	2198	2160	1666	1960	CIZ1
ENSG00000197930	1970	1861	1002	1532	2197	2165	2872	2838	ERO1A
ENSG00000104907	2220	1920	1678	1871	2196	2151	1587	1916	TRMT1
ENSG00000160957	2554	2422	2962	2467	2195	2273	1863	2054	RECQL4
ENSG00000168453	1563	1706	2299	1741	2193	2069	1577	1661	HR
ENSG00000104805	2039	1812	2803	3044	2191	2190	2616	2314	NUCB1
ENSG00000174953	2087	2268	972	1302	2191	2396	1937	2510	DHX36
ENSG00000168092	2334	2390	2708	2149	2190	2413	2159	2269	PAFAH1B2
ENSG00000184990	2571	1973	1274	2172	2190	2070	1708	1868	SIVA1
ENSG00000133612	2559	2355	2829	2569	2189	1938	2020	1885	AGAP3
ENSG00000173327	2074	2026	3432	2302	2189	1978	2041	1763	MAP3K11
ENSG00000126698	2837	2483	1487	2015	2188	2033	2124	1975	DNAJC8
ENSG00000136877	2194	2024	2610	2006	2187	2033	1878	1719	FPGS
ENSG00000070614	1742	2201	3373	2444	2186	2093	1855	1824	NDST1
ENSG00000136699	1565	2028	1917	1595	2186	2137	1345	1690	SMPD4
ENSG00000126261	2389	2454	1329	1923	2184	2255	1894	2311	UBA2
ENSG00000122140	2669	2315	2207	2381	2183	2381	1502	1878	MRPS2
ENSG00000166166	1876	1717	1332	1375	2183	2063	1091	1340	TRMT61A
ENSG00000064666	1943	1971	2436	2179	2182	2107	2038	2041	CNN2
ENSG00000180398	2076	2279	1741	2123	2181	2189	2154	2302	MCFD2
ENSG00000168615	2122	2205	1036	1705	2181	2384	2286	2642	ADAM9
ENSG00000100991	2163	2048	2889	2544	2180	2114	2401	2303	TRPC4AP
ENSG00000139645	1554	2217	3135	2440	2179	1989	1918	2146	ANKRD52
ENSG00000198408	2353	2869	2203	2288	2176	2197	2682	2908	OGA
ENSG00000214485	2808	2329	2203	2054	2173	1763	2160	2209	RPL7P1
ENSG00000108557	1648	2023	2683	2260	2173	1956	1560	1753	RAI1
ENSG00000173442	2062	1998	3403	2180	2172	1998	2170	1852	EHBP1L1
ENSG00000077232	1869	1929	900	1211	2172	2422	2032	2765	DNAJC10
ENSG00000143179	2225	2283	1848	2301	2172	2225	1748	1950	UCK2
ENSG00000206527	1965	2027	1332	1713	2172	2059	1800	2561	HACD2
ENSG00000116251	3339	2653	1530	2457	2171	2460	2015	2253	RPL22
ENSG00000197136	1764	2045	3086	2399	2170	2122	1872	2124	PCNX3
ENSG00000102858	1414	1706	1872	1864	2170	1962	1734	1836	MGRN1
ENSG00000157637	1815	1653	2736	2153	2169	2056	2135	1915	SLC38A10
ENSG00000272391	1777	2246	2837	2607	2169	2138	1574	2008	POM121C
ENSG00000008710	1649	2155	2722	2604	2167	2291	1840	2332	PKD1
ENSG00000188986	2462	2182	3233	2753	2166	2014	2070	1946	NELFB
ENSG00000161202	1767	2006	2443	2272	2166	2167	1912	2102	DVL3
ENSG00000152104	1531	2046	2659	2273	2164	2016	1728	2354	PTPN14
ENSG00000125656	2638	2307	2696	2687	2163	1958	2057	1935	CLPP
ENSG00000176853	1919	1990	792	1324	2163	2331	1763	2407	FAM91A1
ENSG00000148400	1298	1668	2549	2106	2163	1882	1289	2068	NOTCH1
ENSG00000133243	2920	2706	4912	3693	2159	2392	2643	2263	BTBD2
ENSG00000242372	2316	1950	2085	2078	2158	2052	1800	1815	EIF6
ENSG00000115233	2300	2137	1211	1542	2157	2097	1947	2070	PSMD14
ENSG00000041357	2431	2113	927	1347	2156	1991	2035	2091	PSMA4
ENSG00000160131	2357	2246	1198	1731	2156	2287	1841	2258	VMA21
ENSG00000173153	2404	2349	2334	2442	2155	2162	1902	1725	ESRRA
ENSG00000114346	2390	2643	936	1421	2155	2531	1996	2695	ECT2
ENSG00000109919	2433	2047	1923	2087	2153	2099	1791	2109	MTCH2
ENSG00000117395	2361	2042	1642	1689	2151	2096	1634	1958	EBNA1BP2
ENSG00000167881	2142	2044	2304	2327	2150	2306	2110	2414	SRP68
ENSG00000130706	2096	1942	1578	1661	2150	2167	1381	1521	ADRM1
ENSG00000113389	1768	2074	1176	1402	2150	2219	1327	2051	NPR3
ENSG00000146670	2378	2237	2215	2212	2149	2219	1757	1991	CDCA5
ENSG00000120800	1356	1702	970	949	2149	2030	942	1975	UTP20
ENSG00000004779	2952	2326	1674	2206	2147	2074	1819	2240	NDUFAB1
ENSG00000143398	1763	2037	1530	1804	2146	2088	1644	1957	PIP5K1A
ENSG00000123064	2045	2095	3089	2270	2145	2053	1631	1685	DDX54
ENSG00000178741	2501	1966	1768	2052	2145	1952	1700	1871	COX5A
ENSG00000124228	1739	1804	1286	1488	2145	1876	1572	1772	DDX27
ENSG00000197965	2046	2147	1906	2265	2142	2102	1957	2326	MPZL1
ENSG00000121057	1896	2109	1972	2114	2139	1896	1693	1892	AKAP1
ENSG00000197170	2163	2200	1048	1322	2138	2154	1790	2260	PSMD12
ENSG00000138385	2326	2286	732	1068	2137	2337	2077	2440	SSB
ENSG00000154122	2032	2261	2653	2784	2136	2009	2259	2217	ANKH
ENSG00000142409	2308	1959	2261	1977	2135	2026	1544	1630	ZNF787
ENSG00000177700	3031	2251	1143	2160	2134	1717	1708	1836	POLR2L
ENSG00000196367	1211	1884	2567	2279	2134	1817	1364	1946	TRRAP
ENSG00000196363	1993	1796	1670	1865	2134	1851	1605	1832	WDR5
ENSG00000143393	1913	1962	2481	2183	2131	2021	1855	2013	PI4KB
ENSG00000176340	2913	2137	1400	2413	2131	2306	1731	1666	COX8A
ENSG00000131323	1875	2040	2310	2123	2128	2053	1890	2105	TRAF3
ENSG00000177830	2198	2002	2817	2875	2127	2073	2561	2459	CHID1
ENSG00000198356	2324	2245	1932	2256	2127	2058	1826	1729	ASNA1
ENSG00000117411	2502	2470	3833	3238	2126	2106	2392	2068	B4GALT2
ENSG00000131263	2099	2406	1395	1782	2126	2255	2147	2345	RLIM
ENSG00000164692	3692	3516	5908	5987	2124	2095	3289	2951	COL1A2
ENSG00000169021	2765	2246	1599	2076	2124	2117	1684	1951	UQCRFS1
ENSG00000177479	2104	1999	1776	1858	2124	2297	1650	1969	ARIH2
ENSG00000111605	2342	2351	1107	1735	2123	2354	1834	2327	CPSF6
ENSG00000119314	1776	2065	1318	1412	2123	2237	1715	2409	PTBP3
ENSG00000078304	2337	2199	1568	2045	2120	2162	2296	2566	PPP2R5C
ENSG00000107949	2435	2208	723	1160	2120	2300	1761	2051	BCCIP
ENSG00000074696	1944	1991	1696	1872	2117	2000	2153	2323	HACD3
ENSG00000142507	2377	1839	1919	1861	2115	2023	1766	1777	PSMB6
ENSG00000107959	1599	1913	2325	2060	2115	2093	1731	2128	PITRM1
ENSG00000161638	1504	1762	2781	2743	2113	1820	3889	2308	ITGA5
ENSG00000143106	2569	2176	1346	1708	2113	2163	2058	2014	PSMA5
ENSG00000164251	2905	2872	1939	2423	2112	2027	2025	1881	F2RL1
ENSG00000154305	1648	2223	1479	1582	2110	2032	2266	2521	MIA3
ENSG00000084073	2206	2179	1133	1345	2110	2489	1551	2245	ZMPSTE24
ENSG00000149485	1770	2082	2673	2308	2107	2044	1892	2147	FADS1
ENSG00000134057	2341	2055	1813	2000	2106	2136	1654	2178	CCNB1
ENSG00000168137	1568	2176	1950	1921	2105	1973	2260	2442	SETD5
ENSG00000067334	2038	2121	593	724	2104	2107	1799	2062	DNTTIP2
ENSG00000185787	2616	2309	1215	1987	2100	2292	2231	2450	MORF4L1
ENSG00000174574	1759	1705	1262	1574	2100	2118	1897	2054	AKIRIN1
ENSG00000141905	1883	2242	3552	2523	2099	1954	1892	1895	NFIC
ENSG00000119596	1492	1997	2344	2145	2099	1999	1938	2242	YLPM1
ENSG00000278540	1288	1960	2414	2036	2099	1766	1589	2066	ACACA
ENSG00000017797	1980	2201	2313	2076	2098	2106	2205	2205	RALBP1
ENSG00000127837	2291	2040	2025	2135	2097	1953	1656	1581	AAMP
ENSG00000130935	2139	1935	735	1309	2095	2255	1558	2174	NOL11
ENSG00000136718	2356	2042	1877	1945	2094	1845	1439	1718	IMP4
ENSG00000102265	2623	1987	1716	2437	2093	1888	2178	2008	TIMP1
ENSG00000087191	2307	2033	1959	1674	2093	2198	1836	1935	PSMC5
ENSG00000130227	1863	2246	2281	2126	2093	2100	1841	2284	XPO7
ENSG00000170876	1738	1607	1418	1647	2091	2179	1479	1912	TMEM43
ENSG00000163682	3418	2704	2610	2527	2090	1750	2141	2228	RPL9
ENSG00000069011	2084	1761	3735	2614	2090	1884	1979	2079	PITX1
ENSG00000127948	1997	1851	2347	2212	2089	1982	1876	1850	POR
ENSG00000151150	1566	2299	1548	1613	2088	2171	1524	2550	ANK3
ENSG00000114354	2075	2006	1272	1727	2087	2073	1886	2306	TFG
ENSG00000166165	3231	2504	2595	3246	2086	2026	2393	2200	CKB
ENSG00000138363	1780	1704	1728	1817	2086	2105	1733	2234	ATIC
ENSG00000131653	2097	2213	3912	2904	2085	2046	2084	2117	TRAF7
ENSG00000102007	2643	2318	2384	2761	2085	2155	1976	2210	PLP2
ENSG00000189043	2730	2467	1096	2136	2085	1910	1796	2089	NDUFA4
ENSG00000124571	1611	2083	2358	2032	2084	2060	1690	2198	XPO5
ENSG00000115159	1855	2189	1419	1565	2080	2106	1660	2244	GPD2
ENSG00000160767	2181	1981	2449	2327	2079	2040	1862	1809	FAM189B
ENSG00000182871	2339	2295	3571	3963	2077	2019	2364	2226	COL18A1
ENSG00000113558	2746	2145	1245	1977	2076	2251	2058	2399	SKP1
ENSG00000116120	2039	2032	1771	1776	2076	2077	1646	2241	FARSB
ENSG00000072310	2462	2422	2610	2527	2075	2099	2129	1954	SREBF1
ENSG00000128245	2179	1857	1589	1826	2075	2120	1844	2056	YWHAH
ENSG00000076248	2170	1918	1851	2038	2074	1921	1354	1755	UNG
ENSG00000122545	2243	2348	765	1326	2073	2104	2231	2498	2023-09-07
ENSG00000071794	2286	2608	982	1864	2072	2158	2658	3377	HLTF
ENSG00000131508	2296	2156	1822	1975	2071	1977	1809	1870	UBE2D2
ENSG00000112297	1546	1869	1351	1335	2071	1957	1512	1913	CRYBG1
ENSG00000114767	2153	1836	1558	1644	2071	1986	1327	1589	RRP9
ENSG00000104853	1737	1770	2704	2081	2069	1932	1649	1753	CLPTM1
ENSG00000100220	2085	1845	2173	1723	2066	2075	1779	1852	RTCB
ENSG00000152492	2118	2156	2022	2353	2065	2187	2269	2449	CCDC50
ENSG00000101843	2679	2475	1653	2341	2064	2026	2563	2634	PSMD10
ENSG00000283041	2850	2557	3990	3399	2062	2242	2125	2138	AC008038.1
ENSG00000053372	2621	2104	2425	1989	2062	1973	1595	1839	MRTO4
ENSG00000132824	1840	1972	1625	1937	2061	2116	2115	2311	SERINC3
ENSG00000125484	2008	2144	2287	2020	2059	2093	1621	2171	GTF3C4
ENSG00000156650	1423	2303	1523	1913	2058	2032	1986	2437	KAT6B
ENSG00000177963	1782	1964	2400	2107	2056	1761	1751	1742	RIC8A
ENSG00000099875	2215	2124	2930	2902	2053	1996	2609	2468	MKNK2
ENSG00000117500	1879	1841	986	1328	2053	2089	2085	2736	TMED5
ENSG00000001036	2074	1851	1964	1814	2053	1961	1487	1786	FUCA2
ENSG00000008952	2125	2128	974	1088	2051	2106	2228	2405	SEC62
ENSG00000049759	1891	2039	2316	2304	2051	2079	2012	2446	NEDD4L
ENSG00000116209	2211	1984	1431	1679	2050	2107	2454	2202	TMEM59
ENSG00000117298	1652	1809	3252	2652	2050	1740	2382	2003	ECE1
ENSG00000132485	2264	2324	634	1264	2050	2190	2210	2529	ZRANB2
ENSG00000017260	1900	1941	1575	1866	2050	2129	2094	2656	ATP2C1
ENSG00000174938	1788	1665	2617	3099	2049	1887	2373	2092	SEZ6L2
ENSG00000188153	1928	2194	2182	2832	2048	2124	3253	2979	COL4A5
ENSG00000197879	1558	1869	3533	2862	2048	1867	2572	2129	MYO1C
ENSG00000088205	1926	1981	793	1289	2047	2118	1692	2149	DDX18
ENSG00000176171	3994	3794	3340	4178	2046	1915	4525	3232	BNIP3
ENSG00000114650	1920	1768	3940	2612	2046	1925	1891	1964	SCAP
ENSG00000114978	1893	2214	1235	1583	2046	2078	1953	2271	MOB1A
ENSG00000076108	1396	2003	2750	2257	2045	1890	1911	2314	BAZ2A
ENSG00000055130	2210	2303	1349	1632	2045	2103	1791	2173	CUL1
ENSG00000186174	1375	2142	3746	2873	2044	1846	1779	1804	BCL9L
ENSG00000156802	2181	2400	907	1442	2043	2285	2049	2719	ATAD2
ENSG00000101337	1763	2001	2303	2635	2042	1926	2040	2157	TM9SF4
ENSG00000127526	1936	2031	3324	2585	2042	2071	2070	2134	SLC35E1
ENSG00000105011	2122	1966	1693	2280	2042	1967	1733	1843	ASF1B
ENSG00000162923	1976	2189	1520	1790	2041	2297	2298	2432	WDR26
ENSG00000135074	1410	1768	2761	2088	2041	2039	2475	2048	ADAM19
ENSG00000070047	1661	1766	2842	1955	2041	1718	1666	1505	PHRF1
ENSG00000254999	2640	2257	1601	1958	2038	1884	2034	1818	BRK1
ENSG00000196205	2572	2471	3061	2852	2037	1960	2245	2069	EEF1A1P5
ENSG00000073111	1867	2155	2913	2458	2036	1896	1398	1626	MCM2
ENSG00000145919	2222	1793	2145	1930	2034	1994	1930	2050	BOD1
ENSG00000059122	1589	1740	2427	2080	2033	2161	2042	2005	FLYWCH1
ENSG00000173210	1468	1839	2423	2200	2033	2180	2689	2318	ABLIM3
ENSG00000114315	2925	2233	825	1746	2033	2260	974	1864	HES1
ENSG00000153292	2441	2813	2685	3068	2032	2162	3182	2780	ADGRF1
ENSG00000151348	1708	1795	2006	2300	2032	2017	2143	2170	EXT2
ENSG00000105676	1881	1682	2005	1774	2032	1938	1261	1577	ARMC6
ENSG00000086232	2008	2148	2029	2352	2025	1994	2122	2267	EIF2AK1
ENSG00000077549	2033	1875	2272	2041	2024	2003	2132	2056	CAPZB
ENSG00000173020	2081	1880	2286	2250	2022	1994	1975	1808	GRK2
ENSG00000115694	2150	2014	2221	2354	2021	1956	1771	1819	STK25
ENSG00000103266	2376	2139	2544	2468	2020	2140	1759	1609	STUB1
ENSG00000179958	2584	2053	1822	2060	2020	2148	1440	1654	DCTPP1
ENSG00000141349	2056	1947	1915	2175	2019	2056	1659	1709	G6PC3
ENSG00000164828	1731	1983	1532	1984	2018	1919	1993	2162	SUN1
ENSG00000089902	1848	1914	1524	1752	2016	2247	1634	2140	RCOR1
ENSG00000204262	2147	2291	2193	2784	2015	2068	2777	2857	COL5A2
ENSG00000164062	2188	2113	3810	2988	2015	1913	2234	2206	APEH
ENSG00000084463	1822	1978	1704	2031	2015	2018	1576	2062	WBP11
ENSG00000167291	1801	2436	6207	3819	2014	1830	2515	2209	TBC1D16
ENSG00000013275	2115	1902	1485	1661	2014	2030	1553	1708	PSMC4
ENSG00000138434	1818	1946	1065	1520	2013	2211	2183	2488	ITPRID2
ENSG00000196235	1650	1994	2159	1786	2013	1966	1719	1595	SUPT5H
ENSG00000160049	2211	2227	3386	2941	2011	2057	2391	2645	DFFA
ENSG00000131236	1701	2089	1969	1942	2011	1835	1861	1961	CAP1
ENSG00000076003	1458	1596	1021	1275	2011	1991	1608	2016	MCM6
ENSG00000141564	1540	1926	2789	2034	2010	1887	1415	1645	RPTOR
ENSG00000174238	1382	1516	1451	1367	2009	1963	1506	1793	PITPNA
ENSG00000146918	2129	1930	1500	1830	2006	2169	1786	2230	NCAPG2
ENSG00000007520	2361	1810	2368	2079	2004	1983	1740	1583	TSR3
ENSG00000100726	1873	1727	1960	1975	2003	1911	1360	1682	TELO2
ENSG00000118816	2341	2389	3252	2465	2002	2184	2121	2372	CCNI
ENSG00000149923	2275	1930	2693	2114	2001	1923	2014	1821	PPP4C
ENSG00000168090	2180	1894	2550	2158	2001	1789	1946	1791	COPS6
ENSG00000084652	1675	2000	1854	1998	2001	1765	1718	1809	TXLNA
ENSG00000102898	2198	1843	1958	1971	2001	1690	1785	1984	NUTF2
ENSG00000167635	2029	2135	657	970	2000	2141	1865	2303	ZNF146
ENSG00000081154	2547	2325	1135	1788	1996	2107	1967	2344	PCNP
ENSG00000134697	1803	1925	848	1063	1995	2046	1757	1816	GNL2
ENSG00000179262	2105	2112	2664	2750	1993	1911	2147	1941	RAD23A
ENSG00000164054	1462	1451	2350	1840	1991	1782	2433	1968	SHISA5
ENSG00000186716	1509	1850	3533	2330	1990	1755	1675	1702	BCR
ENSG00000130511	2530	2248	2676	2443	1989	1950	1890	1757	SSBP4
ENSG00000106976	1639	1907	2111	1856	1988	1928	1908	2029	DNM1
ENSG00000108064	2077	1867	698	1092	1988	2031	1378	1898	TFAM
ENSG00000012660	2127	2039	2150	2193	1982	2173	2107	2421	ELOVL5
ENSG00000075413	2008	1878	1435	1629	1982	2147	2025	2257	MARK3
ENSG00000105447	1798	1764	2331	1740	1982	2095	1337	1550	GRWD1
ENSG00000257923	1407	1955	2315	2273	1981	1790	1651	1741	CUX1
ENSG00000106785	1515	1622	1990	1936	1980	1857	1641	1930	TRIM14
ENSG00000136875	1958	1879	1884	1787	1978	1898	1595	1889	PRPF4
ENSG00000068878	1787	2137	1497	1507	1977	2149	1765	2220	PSME4
ENSG00000165271	1578	1567	1886	1501	1976	1897	1113	1592	NOL6
ENSG00000074201	2464	2179	1532	1957	1975	1976	1814	1976	CLNS1A
ENSG00000183576	2051	2072	1367	1710	1975	1975	1866	1933	SETD3
ENSG00000101311	1210	1575	1308	1311	1975	1881	1127	1574	FERMT1
ENSG00000100030	1890	1933	1697	1945	1972	2232	1870	2343	MAPK1
ENSG00000171302	2044	1910	3257	2576	1971	1964	2098	1890	CANT1
ENSG00000153989	2055	2065	1054	1418	1970	2041	1577	1912	NUS1
ENSG00000141756	2436	2268	3484	3242	1969	2051	2545	1976	FKBP10
ENSG00000106615	2444	2042	1461	1951	1968	1885	1939	1986	RHEB
ENSG00000135069	2013	1877	1528	1770	1966	1925	1325	2131	PSAT1
ENSG00000107263	1623	2057	2871	2277	1966	1851	1529	1863	RAPGEF1
ENSG00000100605	1957	2044	2752	2442	1965	1773	1691	1711	ITPK1
ENSG00000095002	2068	2023	828	1243	1965	1983	1669	2140	MSH2
ENSG00000137497	1456	1901	2833	2215	1964	1811	1927	1864	NUMA1
ENSG00000155090	1744	1713	1160	1876	1964	2193	1504	2143	KLF10
ENSG00000187079	1507	2121	1266	1503	1964	2004	1688	2359	TEAD1
ENSG00000144021	2040	2099	1697	2084	1961	2011	1886	1888	CIAO1
ENSG00000114302	1840	2040	2501	1877	1961	2095	1281	1838	PRKAR2A
ENSG00000211460	2047	1818	1207	1584	1960	1999	1493	1903	TSN
ENSG00000071537	1383	1765	1353	1343	1959	2003	1968	2550	SEL1L
ENSG00000177239	1876	1752	2711	2381	1957	1791	2424	1843	MAN1B1
ENSG00000162889	2311	2114	2688	2550	1957	1999	2001	2005	MAPKAPK2
ENSG00000163812	2211	2344	2677	2248	1957	1965	1943	1849	ZDHHC3
ENSG00000085721	2033	2022	1143	1487	1957	2078	1704	2127	RRN3
ENSG00000105048	2974	2410	3267	2907	1956	1800	2879	1912	TNNT1
ENSG00000111786	2648	2278	1419	2183	1956	1829	2027	1483	SRSF9
ENSG00000076928	1531	1544	1567	1760	1956	1725	1637	1491	ARHGEF1
ENSG00000100138	2477	2128	1695	1906	1955	1937	1838	1758	SNU13
ENSG00000117676	1551	1774	2223	1863	1955	1744	1694	1580	RPS6KA1
ENSG00000197912	1487	1555	1392	1556	1954	1962	1762	1877	SPG7
ENSG00000113194	1691	1874	1590	1846	1954	1891	1484	1972	FAF2
ENSG00000104320	1629	1630	644	896	1953	2154	1405	2046	NBN
ENSG00000066084	1496	2002	1936	1979	1952	1927	1597	1953	DIP2B
ENSG00000117984	2120	1591	1669	2047	1949	2150	1857	1846	CTSD
ENSG00000255302	2427	2183	1005	1517	1949	1934	2036	1839	EID1
ENSG00000169718	2076	1628	1275	1724	1949	1830	1531	1559	DUS1L
ENSG00000107130	2013	2149	3705	2760	1948	1903	2283	1997	NCS1
ENSG00000136045	2086	2055	1134	1269	1948	1937	1314	1615	PWP1
ENSG00000197256	1437	1822	2354	2075	1947	1849	1844	1798	KANK2
ENSG00000178464	2769	2509	2208	2538	1946	1668	1676	1654	RPL10P16
ENSG00000205476	1779	2028	3337	2613	1946	1816	1615	1870	CCDC85C
ENSG00000097007	1635	1969	3078	2637	1944	2021	1841	1805	ABL1
ENSG00000110400	1576	1889	2839	2154	1944	1802	1468	1684	NECTIN1
ENSG00000113594	1404	1667	740	864	1943	2102	1374	2385	LIFR
ENSG00000179889	1618	1822	1581	1751	1942	2005	1800	2083	PDXDC1
ENSG00000163349	1706	2160	2352	2279	1941	1957	1815	2323	HIPK1
ENSG00000024422	1512	1796	3214	2457	1940	1848	2316	1912	EHD2
ENSG00000112378	2105	2007	1513	1914	1940	1985	2135	2217	PERP
ENSG00000172366	2349	1776	1894	1930	1938	1740	1624	1571	MCRIP2
ENSG00000118523	2032	1750	1123	2119	1937	2534	997	2116	CTGF
ENSG00000029364	1485	1559	1507	1547	1937	1784	1866	2030	SLC39A9
ENSG00000060491	1995	1732	2023	1902	1935	1643	1847	1496	OGFR
ENSG00000141447	1931	1978	1792	2030	1935	1975	2055	2410	OSBPL1A
ENSG00000130589	656	820	1254	1104	1931	1381	2183	1821	HELZ2
ENSG00000175467	1729	1755	2240	1907	1931	1934	1587	1465	SART1
ENSG00000197771	1976	1949	1297	1634	1931	1925	1635	1818	MCMBP
ENSG00000133226	1618	2207	1323	1688	1930	1995	1722	2039	SRRM1
ENSG00000168924	1713	1776	2627	1916	1930	1831	1532	1696	LETM1
ENSG00000138760	1720	1786	1389	1620	1929	1977	1892	2114	SCARB2
ENSG00000102181	1680	1690	2946	2807	1929	1972	2620	2224	CD99L2
ENSG00000051596	2082	1774	1762	2296	1929	1792	1697	1813	THOC3
ENSG00000136271	2007	1726	1736	1580	1929	1821	1333	1689	DDX56
ENSG00000101447	1887	1783	1616	1991	1929	1908	1511	1986	FAM83D
ENSG00000103197	1378	1652	2937	2092	1927	1882	1725	1984	TSC2
ENSG00000143183	2297	2136	1284	1584	1927	1914	1821	1967	TMCO1
ENSG00000131149	1370	1837	1941	1807	1927	1901	1432	1855	GSE1
ENSG00000081791	1836	1900	1499	1931	1926	1932	1566	1946	DELE1
ENSG00000010438	2588	2218	2175	2434	1925	1895	2093	1622	PRSS3
ENSG00000157916	2004	1736	1910	1774	1925	1845	1782	2049	RER1
ENSG00000105968	2396	2200	1801	2194	1925	2049	1976	2117	H2AFV
ENSG00000034152	2178	2025	1914	2177	1924	1665	1546	1552	MAP2K3
ENSG00000156113	1957	1976	2326	2169	1923	2043	2178	2324	KCNMA1
ENSG00000198931	2443	1945	2600	2788	1922	1813	2073	1961	APRT
ENSG00000060749	1462	1941	1081	1292	1922	2122	1478	2460	QSER1
ENSG00000214078	1841	1605	1796	1901	1921	1885	1878	2100	CPNE1
ENSG00000085872	1397	1841	2341	2163	1920	1852	1306	1575	CHERP
ENSG00000158470	1835	1944	1807	2074	1919	1932	1887	2050	B4GALT5
ENSG00000155959	2355	2071	1025	1606	1919	2005	1905	2217	VBP1
ENSG00000116350	2115	1980	1736	1998	1917	1782	1967	2083	SRSF4
ENSG00000174903	1930	1937	2546	2270	1917	1866	1872	1608	RAB1B
ENSG00000108091	1603	1673	1192	1423	1917	1945	1507	1983	CCDC6
ENSG00000103966	1813	1909	2321	2219	1916	1810	1834	1812	EHD4
ENSG00000069345	2072	2011	1634	1549	1916	1938	1888	2020	DNAJA2
ENSG00000123983	2359	2422	1221	1497	1915	1988	1885	2495	ACSL3
ENSG00000162434	1663	1979	1736	1969	1914	1857	1998	2224	JAK1
ENSG00000126012	1548	1930	2700	2133	1914	1741	1757	1760	KDM5C
ENSG00000198682	1566	1788	1740	2207	1914	1876	1913	2128	PAPSS2
ENSG00000114023	3372	2789	1706	2476	1913	1895	3083	2251	FAM162A
ENSG00000029993	2622	2406	1453	2111	1912	1741	1818	2054	HMGB3
ENSG00000126464	1430	1765	2578	2190	1910	1862	1572	1693	PRR12
ENSG00000153944	1839	2249	1548	1766	1909	1843	1866	2161	MSI2
ENSG00000153113	1818	1989	1693	1904	1907	2113	2439	2375	CAST
ENSG00000101126	1785	2143	1682	1900	1907	2008	1834	2231	ADNP
ENSG00000018510	1712	1770	965	1269	1907	1980	1520	1949	AGPS
ENSG00000161800	1917	1805	1830	1995	1907	1820	1825	2140	RACGAP1
ENSG00000108468	2254	2233	1463	1983	1906	1787	2051	2049	CBX1
ENSG00000141385	1901	1856	1648	1647	1906	1902	1471	1725	AFG3L2
ENSG00000142871	1636	1370	584	1165	1904	2062	672	1621	CYR61
ENSG00000065518	2399	2006	1422	2090	1903	1710	1803	1725	NDUFB4
ENSG00000110717	2235	1826	1944	2047	1902	1703	1780	1673	NDUFS8
ENSG00000159069	1705	1546	1902	1652	1902	1779	1456	1374	FBXW5
ENSG00000126391	1947	1816	1107	1745	1902	1783	1317	1383	FRMD8
ENSG00000179604	1901	1915	2353	2080	1901	1746	1762	1640	CDC42EP4
ENSG00000155254	1544	1588	2083	1842	1900	1798	1933	1835	MARVELD1
ENSG00000153207	1512	2042	813	964	1900	1977	1445	1987	AHCTF1
ENSG00000165283	2285	1954	2205	2112	1899	1738	1678	1619	STOML2
ENSG00000025800	1677	2013	1785	1805	1899	1786	1685	1939	KPNA6
ENSG00000031823	1791	1762	1745	1817	1898	1740	1517	1612	RANBP3
ENSG00000099942	1589	1820	1670	1907	1898	1758	1675	1792	CRKL
ENSG00000105397	1449	1711	2148	1909	1897	1949	2009	1936	TYK2
ENSG00000074527	1810	1917	1538	2061	1896	1828	2348	2210	NTN4
ENSG00000100522	1858	1987	1364	1699	1896	2040	1606	2004	GNPNAT1
ENSG00000099795	3096	2254	2219	2480	1893	1905	1807	1717	NDUFB7
ENSG00000128928	1803	1960	2057	2208	1893	1908	1839	2094	IVD
ENSG00000124570	1853	1824	1839	1724	1893	1995	2218	2088	SERPINB6
ENSG00000163946	1642	2028	1093	1424	1893	1942	1953	2449	FAM208A
ENSG00000198492	2074	2041	1421	1795	1893	1850	1529	1778	YTHDF2
ENSG00000106367	2386	1978	1957	2273	1892	1700	1956	1865	AP1S1
ENSG00000172586	2555	2022	1228	1886	1892	1560	1840	1812	CHCHD1
ENSG00000132329	2226	1699	1240	1908	1891	1757	1691	1584	RAMP1
ENSG00000185033	1565	1724	1923	2093	1891	1836	2314	1987	SEMA4B
ENSG00000140157	1812	1850	1593	1714	1891	1791	1393	1779	NIPA2
ENSG00000134590	2115	1854	1651	2295	1890	1865	2263	1875	RTL8C
ENSG00000153310	2353	2032	999	1536	1890	2065	1638	1992	FAM49B
ENSG00000049449	1909	1677	1376	1830	1889	1925	1991	2355	RCN1
ENSG00000122515	1478	1632	1680	1604	1889	1656	1594	1749	ZMIZ2
ENSG00000100241	1825	2024	4855	2918	1888	1735	2086	1853	SBF1
ENSG00000117143	2031	1937	1275	1545	1888	1989	1989	2035	UAP1
ENSG00000111331	824	1077	1747	1447	1887	1524	2854	2257	OAS3
ENSG00000007168	1879	1925	1449	1674	1887	1941	1679	2121	PAFAH1B1
ENSG00000080371	1683	1754	1106	1254	1887	1845	1488	1839	RAB21
ENSG00000164466	2108	2028	1918	1891	1886	1835	1726	2086	SFXN1
ENSG00000175792	2126	1860	1845	2079	1885	1867	1696	1947	RUVBL1
ENSG00000088833	1834	1676	1751	1706	1882	1776	1735	1762	NSFL1C
ENSG00000132470	1329	1640	4263	3019	1881	1613	4726	2422	ITGB4
ENSG00000173334	1906	1854	1179	1484	1881	2031	1107	1709	TRIB1
ENSG00000162704	2147	1869	1651	1881	1880	1951	2174	2011	ARPC5
ENSG00000164961	1652	1923	1182	1584	1880	1863	1670	2078	WASHC5
ENSG00000221978	1932	1864	527	1400	1878	1909	2056	2221	CCNL2
ENSG00000074416	1852	1988	3801	2696	1878	1893	2359	1933	MGLL
ENSG00000169567	2408	1945	1366	1694	1878	1720	1627	1793	HINT1
ENSG00000185359	1468	1665	1786	1769	1877	1805	1378	1562	HGS
ENSG00000197045	1918	1964	904	1193	1877	2137	1645	2267	GMFB
ENSG00000112996	1901	1706	1357	1572	1877	2143	1441	1988	MRPS30
ENSG00000101608	2132	1890	1049	1472	1875	1944	1887	1914	MYL12A
ENSG00000171456	1441	1765	2139	1945	1873	1713	1582	1824	ASXL1
ENSG00000171223	2321	1741	934	1490	1871	1916	1235	1311	JUNB
ENSG00000179409	1527	1726	2315	1930	1871	1804	1459	1724	GEMIN4
ENSG00000143753	2060	1747	1510	1891	1870	1882	1700	2071	DEGS1
ENSG00000196313	1180	1795	2210	1810	1870	1671	1074	1477	POM121
ENSG00000183741	1800	2044	3954	2666	1868	1771	2372	2107	CBX6
ENSG00000120889	1618	1623	1461	1831	1868	1675	1762	1857	TNFRSF10B
ENSG00000165175	2341	2086	1585	2259	1867	1737	2012	1764	MID1IP1
ENSG00000005100	1539	1939	1321	1435	1867	1829	1227	1676	DHX33
ENSG00000103653	1701	1589	1708	1960	1866	1886	1548	1739	CSK
ENSG00000130299	1879	1617	1274	1788	1866	1787	1456	1735	GTPBP3
ENSG00000090006	1846	1845	2389	3300	1865	1818	2582	2181	LTBP4
ENSG00000134107	2020	2081	2029	2409	1865	1831	3264	2240	BHLHE40
ENSG00000010244	1828	1806	1253	1399	1864	2008	1506	1907	ZNF207
ENSG00000013810	2059	1808	2174	2169	1864	1739	1807	1834	TACC3
ENSG00000068697	2429	2040	1582	2182	1863	1825	2088	1990	LAPTM4A
ENSG00000090889	1969	1943	1915	1950	1863	2002	1711	2176	KIF4A
ENSG00000002549	1793	1640	1346	1629	1862	1713	1735	2035	LAP3
ENSG00000170558	1521	1631	1511	1658	1860	2151	1703	2274	CDH2
ENSG00000111799	796	1140	825	861	1860	1824	952	1877	COL12A1
ENSG00000166833	1074	1578	2055	1924	1859	1802	1372	2023	NAV2
ENSG00000108021	1083	1636	811	962	1859	2002	1184	1943	FAM208B
ENSG00000090615	1490	1611	2570	1961	1858	1737	1905	1911	GOLGA3
ENSG00000167112	2091	1985	2134	1859	1858	1730	1317	1525	TRUB2
ENSG00000041802	1634	1762	1381	1338	1858	2045	1432	1657	LSG1
ENSG00000167972	1908	2286	5122	3667	1856	1607	2043	1986	ABCA3
ENSG00000064419	1477	1861	1661	1588	1856	1712	1603	1881	TNPO3
ENSG00000197006	1801	1605	1372	1584	1855	1820	1681	1814	METTL9
ENSG00000072506	2298	1959	1674	1815	1855	1593	1443	1449	HSD17B10
ENSG00000166170	1910	1856	1250	1463	1855	1731	1462	1873	BAG5
ENSG00000166123	1966	2050	2492	2409	1854	1792	2138	1892	GPT2
ENSG00000118900	1429	1875	2636	2240	1853	1801	1748	1848	UBN1
ENSG00000175416	2196	1815	2449	1886	1853	1707	1682	1416	CLTB
ENSG00000172239	1379	1316	793	1128	1853	1705	1728	1857	PAIP1
ENSG00000179820	1706	1571	2016	1907	1850	1981	2186	1905	MYADM
ENSG00000131165	2091	1841	2504	2057	1850	1901	1831	1667	CHMP1A
ENSG00000124145	1712	1785	2413	1950	1849	1784	2331	1866	SDC4
ENSG00000141568	1749	1871	2435	2090	1849	1840	1716	1845	FOXK2
ENSG00000120948	1672	1470	775	1078	1849	2229	1821	2005	TARDBP
ENSG00000105618	2172	1881	1500	1667	1848	1770	1329	1525	PRPF31
ENSG00000064726	1935	1853	954	1403	1847	1865	1489	1840	BTBD1
ENSG00000114120	1788	2151	781	1499	1846	1998	2109	2575	SLC25A36
ENSG00000076924	1778	1600	2595	2005	1846	1737	1715	1728	XAB2
ENSG00000110048	1503	1646	1913	1931	1846	1792	1731	1905	OSBP
ENSG00000102119	2091	2040	1822	2116	1845	1743	1677	1667	EMD
ENSG00000116871	1745	1744	2220	1855	1843	1742	1812	1567	MAP7D1
ENSG00000103365	1873	2108	1921	1992	1842	1936	1800	1848	GGA2
ENSG00000077721	1810	1542	1021	1484	1841	1729	1726	1853	UBE2A
ENSG00000101384	1305	1371	1326	1547	1841	1731	1755	1941	JAG1
ENSG00000029725	1689	1776	1062	1243	1841	1806	1731	1998	RABEP1
ENSG00000147394	979	1052	1813	1393	1840	1947	2242	2041	ZNF185
ENSG00000198258	2837	2109	981	2117	1839	1533	1833	1669	UBL5
ENSG00000100304	1747	1851	2770	2145	1839	1713	1426	1499	TTLL12
ENSG00000185591	1448	1923	2204	1937	1838	1878	1835	2050	SP1
ENSG00000043143	1591	1740	2592	1872	1838	1689	1120	1479	JADE2
ENSG00000117118	2330	2019	1606	1877	1838	1935	1628	1884	SDHB
ENSG00000107223	2702	2189	1910	2314	1837	1677	2164	1826	EDF1
ENSG00000122126	1577	1864	1899	2285	1837	1904	2180	2345	OCRL
ENSG00000168502	1350	1716	2120	1794	1837	1784	1645	1793	MTCL1
ENSG00000119487	2022	1912	2137	2014	1837	2021	1827	1857	MAPKAP1
ENSG00000235174	3296	2746	2255	2873	1836	1882	2335	1994	RPL39P3
ENSG00000078668	2087	1957	1390	1509	1836	1766	1608	1813	VDAC3
ENSG00000135720	1470	1931	1327	1708	1835	1992	1808	2271	DYNC1LI2
ENSG00000113643	1893	1701	1111	1255	1834	1944	1684	1857	RARS
ENSG00000134508	1670	1741	2398	1987	1834	1714	1351	1648	CABLES1
ENSG00000183010	2048	2111	2884	2766	1833	1680	2024	1821	PYCR1
ENSG00000087502	1732	1756	965	1220	1833	2095	2283	2600	ERGIC2
ENSG00000214517	1792	2022	2142	2195	1832	1881	1959	2174	PPME1
ENSG00000170113	1848	2064	1385	1584	1832	1824	1777	1979	NIPA1
ENSG00000100979	1964	1937	2342	2350	1831	1573	1705	1724	PLTP
ENSG00000152642	2049	1985	1715	1994	1830	1944	1963	2286	GPD1L
ENSG00000108604	1885	1919	2134	2069	1830	1699	1649	1630	SMARCD2
ENSG00000145912	2242	1906	2217	2200	1830	1654	1737	1596	NHP2
ENSG00000132603	1920	1965	1057	1382	1830	1767	1166	1526	NIP7
ENSG00000149532	1706	1792	1779	1784	1827	1887	1399	1734	CPSF7
ENSG00000136450	2218	2055	1511	1718	1827	2178	1506	2153	SRSF1
ENSG00000117593	1728	1542	1971	2021	1826	1872	1628	2173	DARS2
ENSG00000135269	1998	1800	949	1469	1825	1867	1695	2016	TES
ENSG00000177889	1956	1960	1295	1564	1824	1880	1829	1783	UBE2N
ENSG00000135862	1378	1826	2279	2260	1823	1832	1964	2183	LAMC1
ENSG00000140941	1692	1590	1228	1601	1822	1857	1784	1946	MAP1LC3B
ENSG00000136636	1990	2192	1068	1525	1822	2012	1617	2017	KCTD3
ENSG00000151491	1934	2114	1001	1749	1820	1863	1682	2186	EPS8
ENSG00000101188	1982	2154	3846	2847	1819	1715	2036	1842	NTSR1
ENSG00000138430	2157	2031	1436	1564	1819	1883	1704	1973	OLA1
ENSG00000004142	1707	1711	1926	1885	1819	1791	1511	1528	POLDIP2
ENSG00000055332	1085	1281	1011	1033	1818	1653	2201	2294	EIF2AK2
ENSG00000130193	2088	1761	1961	1981	1817	1727	1451	1422	THEM6
ENSG00000160216	1779	1836	2953	2410	1817	1686	1751	1884	AGPAT3
ENSG00000156671	1657	1832	1063	1409	1816	2017	2018	2203	SAMD8
ENSG00000103549	1312	1581	2468	1776	1815	1701	1382	1377	RNF40
ENSG00000060339	1737	1891	516	876	1814	1898	1335	1809	CCAR1
ENSG00000126267	2764	2080	1259	2068	1810	1765	1544	1753	COX6B1
ENSG00000114480	1923	2051	1660	2219	1809	1870	2468	2488	GBE1
ENSG00000141985	1845	1820	1942	1770	1809	1757	1528	1512	SH3GL1
ENSG00000176087	1757	1835	2219	2104	1808	1815	1586	1724	SLC35A4
ENSG00000156011	1303	1843	1194	1317	1807	1864	1680	2000	PSD3
ENSG00000116161	2085	1769	904	1353	1807	1700	1688	1786	CACYBP
ENSG00000198911	1744	1793	3207	2510	1806	1805	1740	1795	SREBF2
ENSG00000112697	1736	1623	850	1348	1806	2026	1688	2080	TMEM30A
ENSG00000213281	1954	1794	1190	1527	1806	1981	1519	1938	NRAS
ENSG00000064313	1441	1758	882	1159	1806	1734	1478	1943	TAF2
ENSG00000126456	1966	1704	1811	1907	1804	1806	1941	1790	IRF3
ENSG00000101752	1575	1866	1043	1411	1804	2062	1922	2313	MIB1
ENSG00000158941	1637	1675	1875	1583	1804	1729	1367	1347	CCAR2
ENSG00000100796	1636	1741	814	1229	1803	1881	1424	1752	PPP4R3A
ENSG00000173905	1627	1945	1263	1321	1802	1757	2278	2032	GOLIM4
ENSG00000071539	1943	1725	1471	1636	1802	2007	1531	1936	TRIP13
ENSG00000113328	2527	2148	1447	1871	1801	1804	1845	1995	CCNG1
ENSG00000122068	1744	1813	1007	1432	1801	1919	1879	2336	FYTTD1
ENSG00000162714	1509	1676	2451	1897	1801	1604	1532	1524	ZNF496
ENSG00000205250	1699	1776	1309	1727	1801	1881	1427	1661	E2F4
ENSG00000167088	2211	1842	1000	1374	1801	1713	1526	1688	SNRPD1
ENSG00000137692	2082	1781	1182	1406	1801	1719	1381	1627	DCUN1D5
ENSG00000186468	2373	2415	1953	1987	1798	1790	1818	1434	RPS23
ENSG00000055483	1469	1669	1500	1453	1798	1811	1177	1495	USP36
ENSG00000206503	2187	1695	1289	2431	1797	1479	2364	1735	HLA-A
ENSG00000182379	3819	3268	5139	4999	1796	1639	3681	2256	NXPH4
ENSG00000168288	1865	1724	1304	1447	1796	1820	1731	1868	MMADHC
ENSG00000107164	1750	1835	1174	1636	1796	1686	1352	1716	FUBP3
ENSG00000095906	2044	1685	1842	1862	1794	1626	1547	1350	NUBP2
ENSG00000102554	1484	1689	1095	1210	1794	1754	1366	1666	KLF5
ENSG00000161847	1197	1639	1792	1847	1794	1593	1218	1334	RAVER1
ENSG00000070961	1729	1875	770	914	1793	1939	1334	1821	ATP2B1
ENSG00000214160	1873	1651	2025	2111	1792	1791	1620	1750	ALG3
ENSG00000137312	1863	1734	2224	2349	1792	1561	2118	1732	FLOT1
ENSG00000172046	1521	1618	2300	1861	1791	1721	1469	1645	USP19
ENSG00000182240	2127	1982	2536	2642	1790	1827	1971	2171	BACE2
ENSG00000173898	1232	1556	3887	2463	1790	1680	1762	1777	SPTBN2
ENSG00000004897	1630	1766	867	1155	1790	1838	1478	1941	CDC27
ENSG00000114648	1426	1632	1587	1393	1789	1692	1171	1542	KLHL18
ENSG00000133872	1991	1773	1506	1737	1788	1865	1829	1852	SARAF
ENSG00000143515	1632	2175	2848	2566	1787	1744	2054	2048	ATP8B2
ENSG00000100335	1742	1854	2376	1840	1787	1725	1316	1627	MIEF1
ENSG00000085224	1375	1954	956	913	1785	1864	1997	2255	ATRX
ENSG00000108010	2193	1997	1571	1607	1785	1774	1427	1753	GLRX3
ENSG00000142207	1098	1428	2482	1888	1784	1743	1392	1820	URB1
ENSG00000187840	2284	1942	1719	1986	1783	1653	1491	1599	EIF4EBP1
ENSG00000165458	1575	1775	2627	2139	1782	1816	1988	1955	INPPL1
ENSG00000175203	1886	1828	1901	1865	1782	1750	1705	1718	DCTN2
ENSG00000138069	2227	2093	1256	1775	1781	1825	1976	2118	RAB1A
ENSG00000103495	1850	1754	3424	2271	1781	2092	1577	1716	MAZ
ENSG00000162413	1361	1549	1584	1459	1781	1684	1136	1226	KLHL21
ENSG00000128989	1709	1730	935	1455	1780	1792	1487	1905	ARPP19
ENSG00000175832	2035	1862	2587	2329	1779	1707	1535	1691	ETV4
ENSG00000185236	1914	1699	1727	2262	1778	1853	1833	1807	RAB11B
ENSG00000122958	1735	1761	754	1106	1778	1829	1501	1881	VPS26A
ENSG00000175215	2152	2339	3183	3029	1774	1820	2035	2007	CTDSP2
ENSG00000165502	2705	2061	768	1414	1774	1658	1927	1773	RPL36AL
ENSG00000105135	1796	1679	2496	2204	1774	1579	1711	1670	ILVBL
ENSG00000103018	1934	1988	1674	1702	1774	1849	1693	1830	CYB5B
ENSG00000184207	2141	1688	1858	1821	1774	1549	1483	1507	PGP
ENSG00000138018	1758	1956	1190	1719	1773	1979	1397	2133	SELENOI
ENSG00000165689	1876	1753	1643	1625	1773	1681	1225	1465	ENTR1
ENSG00000090372	1795	1709	1918	1916	1772	1823	1544	1463	STRN4
ENSG00000130640	1640	1594	2148	1716	1772	1596	1596	1607	TUBGCP2
ENSG00000110104	1518	1474	1611	1528	1772	1782	1134	1377	CCDC86
ENSG00000167193	1834	1833	1497	1692	1771	1822	1803	1963	CRK
ENSG00000137575	1975	1927	989	1486	1770	1930	1895	2219	SDCBP
ENSG00000169057	1708	2190	3136	2517	1770	1747	1836	1870	MECP2
ENSG00000104979	2464	2078	1347	2129	1770	1558	1850	1688	C19orf53
ENSG00000172939	1710	1804	1155	1500	1770	1681	1613	1873	OXSR1
ENSG00000143149	1769	1722	1626	1795	1770	1750	1562	1819	ALDH9A1
ENSG00000136937	1808	1845	1345	1617	1770	1839	1725	2200	NCBP1
ENSG00000011007	1650	1672	1475	1621	1769	1682	1430	1655	ELOA
ENSG00000116062	1835	1889	1611	1614	1769	1691	1470	1786	MSH6
ENSG00000265972	1799	1813	2035	2562	1768	1690	4455	2827	TXNIP
ENSG00000066117	1456	1525	1486	1409	1768	1699	1149	1330	SMARCD1
ENSG00000100075	1676	1496	2030	1920	1767	1705	1849	1695	SLC25A1
ENSG00000086504	2078	1770	1848	2042	1767	1639	1615	1485	MRPL28
ENSG00000115234	1949	1668	1951	2011	1766	1633	1571	1553	SNX17
ENSG00000116830	1282	1598	1230	1448	1764	1800	1408	1981	TTF2
ENSG00000165629	2241	1987	1459	1637	1763	1738	1498	1763	ATP5F1C
ENSG00000087269	1866	1730	2272	1551	1763	1902	1135	1407	NOP14
ENSG00000198677	1496	1780	710	1010	1760	1818	1797	2239	TTC37
ENSG00000163660	1580	1665	335	773	1759	2032	1441	2253	CCNL1
ENSG00000103353	1643	1784	2277	2076	1759	1714	1743	1883	UBFD1
ENSG00000111897	1509	1447	740	1096	1758	1840	1885	2078	SERINC1
ENSG00000136521	2186	1809	1693	1956	1757	1586	2061	2126	NDUFB5
ENSG00000177542	1808	1739	1379	1791	1757	1834	1309	1509	SLC25A22
ENSG00000101782	1706	1613	1085	1240	1757	1946	1642	1956	RIOK3
ENSG00000124789	1393	1665	1208	1376	1755	1694	1282	1925	NUP153
ENSG00000108528	1960	1677	2215	2336	1754	1740	1778	1767	SLC25A11
ENSG00000157193	1104	1337	711	974	1754	1833	1319	1774	LRP8
ENSG00000101255	1522	1307	1372	1469	1752	1840	1212	1661	TRIB3
ENSG00000143575	2068	1687	2030	1803	1752	1731	1774	1772	HAX1
ENSG00000162430	1611	1845	3537	3031	1752	1805	2125	1814	SELENON
[truncated: 56,736 more rows]

## Sheet: table6
RB loss up signature			AR repressed signature
	CDKN2A			NRXN3
	MESP1			ALX4
	USP1			TRAF31P2
	RIBC2			ATP2C2
	CCNE2			KDM4A
	GPR137C			TGFBR3
	DONSON			SEMA3C
	AKAP5			RBL1
	ZSCAN16			MET
	ZNF606			CIT
	LHX2			CHAC1
	ELF2			CABLES1
	H2AFV			FLNB
	IQCC			DAB21P
	TTLL7			AUTS2
	ACYP1			DAB1
	ZSCAN18			CDC42EP4
	FANCL			CD55
	POU4F1			TTLL3
	SH3GL2			RP11-159F241
	ID4			MY015B
	CAMK2N2			BCLAF1
	TXNDC16			RIMS1
	RAD1			NEFL
	PIK3R3			GPD2
	CDKN2C			HPCAL4
	DCHS1			SCRN1
	UCHL1			TACC2
	KCTD16			APBB2
	TEX9			CDCA7L
	TIGD7			GABRA5
	RTN3			MGST1
	KIAA1841			DPF1
	CPE			RAl14
	ZNF367			PARP12
	ZNF43			PLXNA2
	HSD17B6			EPB41L2
	PCSK1			IGSF9B
	KCND2			RCOR1
	ZNF528			SMAD7
	STMN1			MAP2K6
	CLSPN			FHOD3
	EID2B			BIN1
	RNASEH2A			TMOD1
	ZNF347			SMAD6
	CDKAL1			DUSP5
	PDIK1L			HUNK
	BTF3L4			MY010
	COCH			CXorf57
	UBR7			SMC6
	GLRB			ARHGEF3
	DAND5			STRBP
	ZNF254			STXBP6
	ZNF610			ROB01
				TANC2
				FRMD3
				GOLIM4
				DPP10
				WSCD1
				TNFAIP2
				EPHA6
				SH3GL2
				BCL2
				BEND3
				MBP
				SAMD5
				TMEM65
				MYB
				ASXL2
				HRH2
				KIAA0319
				CREB5
				AK5
				PALM2-AKAP2
				IKZF3
				ARHGEF28

## Sheet: table7
Oligo sequence used for RT-qPCR analysis
Gene	Forward primers	Reverse primers
ID2	GCTATACAACATGAACGACTGCT	AATAGTGGGATGCGAGTCCAG
AR	ATCCTCATATGGCCCAGTGTC	GCTCTCTAAACTTCCCGTGGC
PSA	GCATGGGATGGGGATGAAGTAAG	CATCAAATCTGAGGGTTGTCTGGA
CHGA	CGCTGTCCTGGCTCTTCTG	TCACCTCGGTATCCCCTTTATTC
NCAM1	GGCATTTACAAGTGTGTGGTTAC	TTGGCGCATTCTTGAACATGA
EZH2	AATCAGAGTACATGCGACTGAGA	GCTGTATCCTTCGCTGTTTCC

## Sheet: table8
Sequences of ID2-shRNAs
sh1	CCCTTCTGAGTTAATGTCAAA
sh2	GACCACCCTCAACACGGATAT
sh3	GAGCCTGCTATACAACATGAA
